# Supplementary material for: Cell crowding activates pro-invasive mechanotransduction pathway in high-grade DCIS via TRPV4 inhibition and cell volume reduction
Source: eLife journal article supplement (doi:10.7554/elife.100490), 2024-09-26
Supplement: fig3-data4 [file elife-100490-fig3-data4-v1.zip]

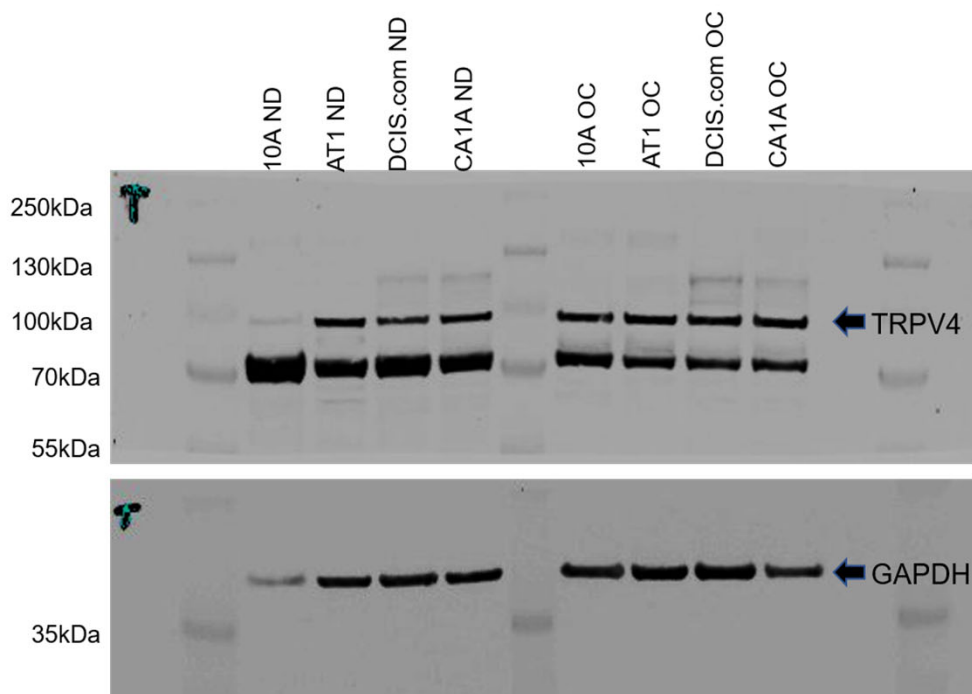

**Figure 3C – source data 1. Original western blot images.** Overall TRPV4 protein levels from whole-cell lysates from four 10A cell derivatives. GAPDH was a loading control.
