# Supplementary material for: Cell crowding activates pro-invasive mechanotransduction pathway in high-grade DCIS via TRPV4 inhibition and cell volume reduction
Source: eLife journal article supplement (doi:10.7554/elife.100490), 2024-09-26
Supplement: fig3-data7 [file elife-100490-fig3-data7-v1.pdf]

| Gene names<br>MCF10DCIS.com<br>cells | Protein Name<br>(MCF10DCIS.com)                                                                                                                                                          | OC/ND ratio<br>(MCF10DCIS.com) |
|--------------------------------------|------------------------------------------------------------------------------------------------------------------------------------------------------------------------------------------|--------------------------------|
| TRPV4                                | Transient Receptor Potential Vanilloid 4                                                                                                                                                 | 153.01                         |
| IVL                                  | Involucrin                                                                                                                                                                               | 55.35                          |
| SCN11A;SCN5A;SCN10A;SCN9A            | Sodium Voltage-Gated Channel Alpha Subunit 11; Sodium Voltage-Gated Channel Alpha Subunit 5; Sodium Voltage-Gated Channel Alpha Subunit 10; Sodium Voltage-Gated Channel Alpha Subunit 9 | 41.82                          |
| HNRNPM                               | Heterogeneous Nuclear Ribonucleoprotein M                                                                                                                                                | 26.91                          |
| COPG2                                | Coatmer Protein Complex Subunit Gamma 2                                                                                                                                                  | 18.33                          |
| S100P                                | S100 calcium-binding protein P                                                                                                                                                           | 18.01                          |
| MRPL16                               | Mitochondrial Ribosomal Protein L16                                                                                                                                                      | 14.43                          |
| IDH2                                 | Isocitrate Dehydrogenase [NADP] Mitochondrial                                                                                                                                            | 8.68                           |
| EML4                                 | Echinoderm Microtubule-Associated Protein-Like 4                                                                                                                                         | 7.94                           |
| GSN                                  | Gelsolin                                                                                                                                                                                 | 7.89                           |
| CKAP4                                | Cytoskeleton-Associated Protein 4                                                                                                                                                        | 7.82                           |
| PRSS8                                | Serine Protease 8                                                                                                                                                                        | 6.93                           |
| MFI2                                 | Melanotransferrin                                                                                                                                                                        | 6.85                           |
| CEACAM1                              | Carcinoembryonic Antigen-Related Cell Adhesion Molecule 1                                                                                                                                | 6.84                           |
| ADGRL3;LPHN3                         | Adhesion G protein-coupled receptor L3; Latrophilin-3                                                                                                                                    | 6.82                           |
| HNRNPC                               | Heterogeneous Nuclear Ribonucleoprotein C                                                                                                                                                | 6.78                           |
| RPL7L1                               | Ribosomal Protein L7-Like 1                                                                                                                                                              | 6.54                           |

|                                                                              |                                                                |      |
|------------------------------------------------------------------------------|----------------------------------------------------------------|------|
| NDUFV1                                                                       | NADH:Ubiquinone Oxidoreductase Core Subunit V1                 | 6.19 |
| HIST1H2A;HIST1H2AH;HIST1H2AF;HIST1H2AJ;HIST1H2AG;HIST1H2AA3;HIST2H2AA3;H2AFX | Histone H2A family                                             | 6.07 |
| GTF2I                                                                        | General Transcription Factor II-I                              | 5.88 |
| ERP44                                                                        | Endoplasmic Reticulum Protein 44                               | 5.81 |
| <b>KCNN4</b>                                                                 | Potassium Intermediate Conductance Calcium-Activated Channel 4 | 5.61 |
| NDUFB9                                                                       | NADH:Ubiquinone Oxidoreductase Subunit B9                      | 5.59 |
| RPL32                                                                        | Ribosomal Protein L32                                          | 5.47 |

**Figure 3 – source data 7.** Gene and protein names that showed more than a 5-fold increase in plasma membrane association under OC conditions relative to ND conditions in MCF10DCIS.com cells were identified by mass spectrometry. Ion channels among these are highlighted in bold.
