# Supplementary material for: Cell crowding activates pro-invasive mechanotransduction pathway in high-grade DCIS via TRPV4 inhibition and cell volume reduction
Source: eLife journal article supplement (doi:10.7554/elife.100490), 2024-09-26
Supplement: fig3-figsupp1-data1 [file elife-100490-fig3-figsupp1-data1-v1.zip]

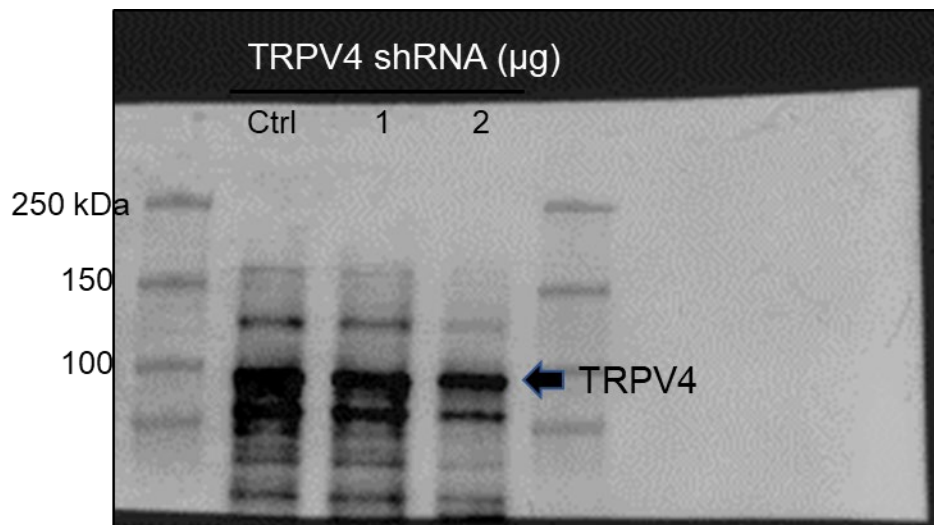

**Figure 3 – figure supplement 1B – source data 1.** Immunoblot results confirmed this dose-responsive depletion of TRPV4, with 33% reduction observed at 1 μg shRNA and 51% at 2 μg.
