# Supplementary material for: Cell crowding activates pro-invasive mechanotransduction pathway in high-grade DCIS via TRPV4 inhibition and cell volume reduction
Source: eLife. 2025 Apr 21;13:RP100490. doi: 10.7554/eLife.100490 (PMC12011371; doi:10.7554/eLife.100490)
Supplement: Figure 1—figure supplement 2—source data 1. [file elife-100490-fig1-figsupp2-data1.xlsx]

## Sheet: Sheet1
Numerical data for Figure 1 - figure supplement 2 - for % dead cell fraction
ND	Day 1 Post Confluence	Day 3 Post Confluence	Day 5 Post Confluence	Day 7 Post Confluence	Day 10 Post Confluence
0.679	2.65006	1.59813	3.16628	0.835655	0.677201
1.03	1.01106	1.47656	6.48649	0.54902	0.539643
	0.360036	1.24651	2.14198	0.26252	0.887749
	2.03365	1.60204	6.15092	1.2014	0.500278
			1.24034	0.75188	1.27615
			2.11024	0.67411	1.63348
			3.55675	0.717261	0.97561
			0.893326	0.3421	1.66304
