# Supplementary material for: Cell crowding activates pro-invasive mechanotransduction pathway in high-grade DCIS via TRPV4 inhibition and cell volume reduction
Source: eLife. 2025 Apr 21;13:RP100490. doi: 10.7554/eLife.100490 (PMC12011371; doi:10.7554/eLife.100490)
Supplement: Figure 1—figure supplement 3—source data 1. [file elife-100490-fig1-figsupp3-data1.xlsx]

## Sheet: Sheet1
Numerical data for Figure 1 - figure supplement 3D - for % invasive cell fraction
ND DCIS.com	Day 2 post con	Day 4 post con	Day 7 post con	Day 10 post con
22.3968	27.417	51.2797	61.6688	59.6688
23.8966	33.4525	55.85	57.7241	51.7241
29.2857	39.9649	49.0989	60.0359	60.0359
27.2549	30.5851	42.8753	59.7818	51.7818
31.0976	26.467	48.4738	58.5565	58.5565
29.8319	29.8535	42.6335	56.4989	56.4989
25.2918	31.29	51.7019	56.3777	56.3777
