# Supplementary material for: Cell crowding activates pro-invasive mechanotransduction pathway in high-grade DCIS via TRPV4 inhibition and cell volume reduction
Source: eLife. 2025 Apr 21;13:RP100490. doi: 10.7554/eLife.100490 (PMC12011371; doi:10.7554/eLife.100490)
Supplement: Figure 1—figure supplement 3—source data 2. [file elife-100490-fig1-figsupp3-data2.xlsx]

## Sheet: Sheet1
Numerical data for Figure 1 - figure supplement 3E - for % invasive cell fraction
ND DCIS.com	OC DCIS.com	DCIS.com reseeded at ND
5.7554	31.98	59.81
18.5324	28.09	58.49
20.7893	28.91	58.04
17.0146	34.63	60.79
17.982	33.67
23.4618	29.56
	30.22
	33.05
