# Supplementary material for: Cell crowding activates pro-invasive mechanotransduction pathway in high-grade DCIS via TRPV4 inhibition and cell volume reduction
Source: eLife. 2025 Apr 21;13:RP100490. doi: 10.7554/eLife.100490 (PMC12011371; doi:10.7554/eLife.100490)
Supplement: Figure 1—figure supplement 3—source data 3. [file elife-100490-fig1-figsupp3-data3.xlsx]

## Sheet: Sheet1
Numerical data for Figure 1 - figure supplement 3F - for % invasive cell fraction
ND DCIS.com	ND DCIS.com in OC conditioned media	OC DCIS.com
37.17	31.98	59.81
32.33	28.09	58.49
34.69	28.91	58.04
27.35	34.63	60.79
33	33.67	61.21
27.71	29.56	65.63
33.02	30.22	67.59
32.57	33.05	72.81
39.56		64.01
36.46		73.97
32.66		71.21
38.5		74.05
40.47		74.01
39.75		69.41
31.6		67.04
36.26		68.34
18.53		71.09
20.79		75.52
17.01		64.38
17.98		73.31
23.46		59.81
		58.49
		58.04
		60.79
