# Supplementary material for: Cell crowding activates pro-invasive mechanotransduction pathway in high-grade DCIS via TRPV4 inhibition and cell volume reduction
Source: eLife. 2025 Apr 21;13:RP100490. doi: 10.7554/eLife.100490 (PMC12011371; doi:10.7554/eLife.100490)
Supplement: Figure 1—source data 1. [file elife-100490-fig1-data1.xlsx]

## Sheet: Sheet1
Numerical data for Figure 1C - % Invasive cell fraction
ND 10A	OC 10A	ND AT1	OC AT1	ND DCIS.com	OC DCIS.com	ND CA1a	OC CA1a
5.7554	0.986278	10.2669	7.26909	25.3968	59.6688	86.631	69.4038
7.69231	0.449102	15.9036	3.2036	26.8966	51.7241	99.8374	99.4362
6.18557	1.4518	9.53545	3.71661	39.2857	60.0359	81.4448	78.5877
5.66038	0.858062	5.65371	8.62857	37.2549	51.7818	78.6596	100
3.6	1.17925	19.1209	8.26101	31.0976	58.5565	78.7105	90.9091
2.76498	1.28857	7.32437	3.21739	29.8319	56.4989	76.8763	99.2519
3.10786				25.2918	56.3777		61.8157
1.32789				30.7222	57.882
				5.6188	61.7
