# Supplementary material for: Cell crowding activates pro-invasive mechanotransduction pathway in high-grade DCIS via TRPV4 inhibition and cell volume reduction
Source: eLife. 2025 Apr 21;13:RP100490. doi: 10.7554/eLife.100490 (PMC12011371; doi:10.7554/eLife.100490)
Supplement: Figure 2—figure supplement 1—source data 1. [file elife-100490-fig2-figsupp1-data1.xlsx]

## Sheet: Sheet1
Numerical data for Figure 2 - figure supplement 1B - for cell volume differences between ND and OC states (um^3)
		Volume different ratio (mean)	SD
10A volume difference ratio		0.326765	0.067242
at1 volume difference ratio		0.100277	0.019026
DCIS.com volume difference ratio		0.54281	0.085132
CA1a volume difference ratio		0.045716	0.015081
