# Supplementary material for: Cell crowding activates pro-invasive mechanotransduction pathway in high-grade DCIS via TRPV4 inhibition and cell volume reduction
Source: eLife. 2025 Apr 21;13:RP100490. doi: 10.7554/eLife.100490 (PMC12011371; doi:10.7554/eLife.100490)
Supplement: Figure 2—figure supplement 1—source data 2. [file elife-100490-fig2-figsupp1-data2.xlsx]

## Sheet: Sheet1
Numerical data for Figure 2 - figure supplement 1C - for cell stiffness differences between ND and OC states (Pa)
	Stiffness difference ratio (mean)	SD
10A stiffness difference ratio	0.586859	0.223773
AT1 stiffness difference ratio	0.445917	0.085389
DCIS.com stiffness difference ratio	0.694946	0.134379
CA1a stiffness difference ratio	0.256193	0.065542
