# Supplementary material for: Cell crowding activates pro-invasive mechanotransduction pathway in high-grade DCIS via TRPV4 inhibition and cell volume reduction
Source: eLife. 2025 Apr 21;13:RP100490. doi: 10.7554/eLife.100490 (PMC12011371; doi:10.7554/eLife.100490)
Supplement: Figure 2—figure supplement 1—source data 3. [file elife-100490-fig2-figsupp1-data3.xlsx]

## Sheet: Sheet1
Numerical data for Figure 2 - figure supplement 1D - for cell volume differences between ND and OC states versus ND volume
	ND volume	normalized cell volume differences between ND and OC states
10A	4618	0.326765
AT1	2892	0.100277
DCIS.com	5431	0.54281
CA1a	2299	0.045716
