# Supplementary material for: Cell crowding activates pro-invasive mechanotransduction pathway in high-grade DCIS via TRPV4 inhibition and cell volume reduction
Source: eLife. 2025 Apr 21;13:RP100490. doi: 10.7554/eLife.100490 (PMC12011371; doi:10.7554/eLife.100490)
Supplement: Figure 2—source data 1. [file elife-100490-fig2-data1.xlsx]

## Sheet: Sheet1
Numerical data for Figure 2A - for cell volume (um^3)
ND 10A volume	OC 10A volume	ND AT1 volume	OC AT1 volume	ND DCIS.com volume	OC DCIS.com volume	ND CA1a volume	ND CA1a volume
6294.74	2107.89	2436.54	2569.8	4720.41	3311.7	3616	2482
4379.36	1768.45	2649.48	1990.2	6783.91	2467.17	2116	1253
6994.27	4798.83	1952.69	1780.2	9976.4	2732.36	2814	2530
6110.76	3396.62	4083.43	3507.3	9569.85	1554.85	2938	1068
5208.39	1762	3693.31	2391.6	4003.97	4774.02	1425	3336
5503.8	1916	2783.06	3799.6	6443.72	1097.28	784.674	2154
1531.57	2030	2393.1	4407.73	7549.47	2027.91	335.857	1583
7480.02	2391	2269.95	1921.05	7970.95	3071.62	1181	2452
5103.1	6472	3358.31	979.65	8501.73	1366.82	808	1621
2504.05	1829	3360.58	1116.1	8740.4	4413.55	4103	723
4198.95	3225	2121.59	2510.9	7434.59	3540.37	4518	2640
5438.72	4476	2761.1	1146.4	5598	3027.35	3058	1845
5254.47	5743	2186.64	3977.81	3964.55	2310.27	4228	2191
3917.05	1609	3029.24	4331.43	5211.15	1794.06	3080	1628
2496.9		3164.93		2642.07	1861.78	664	2009
5686.22		4027.75		3368.78	2795	1671	2147
3670.3				3762.13	3628	1964	1766
3714.59				6782.99	1296	1438	2486
4860.33				5076.21	2342	1159	2746
2459.31				2890.51	2856	1753	1912
3426.13				2321.12	1194	1593	2862
2894.6				3884.62	797	1289	2954
2944.37				2262.48	1335	1928	2457
2944.48				4407.96	1565	2070	2695
2324.24				3560.66		1890	1575
4000.57				5573.93		3747	2895
3987.13				5211.15		2812	2908
4147.43				5877		4698	1885
4039.36				7434		2987
6246.92				5295
2371.66				4273
6590.85				3569
3487.24				3150
4138.29				4005
4021.67				3465
2855.89				1635
3416.82				9616
5632				9850
7153
5074
5014
8694
6860
8133
