# Supplementary material for: Cell crowding activates pro-invasive mechanotransduction pathway in high-grade DCIS via TRPV4 inhibition and cell volume reduction
Source: eLife. 2025 Apr 21;13:RP100490. doi: 10.7554/eLife.100490 (PMC12011371; doi:10.7554/eLife.100490)
Supplement: Figure 2—source data 2. [file elife-100490-fig2-data2.xlsx]

## Sheet: Sheet1
Numerical data for Figure 2C - for cell stiffness (Pa)
ND 10A stiffness	OC 10A stiffness	ND AT1 stiffness	OC AT1 stiffness	ND DCIS.com stiffness	OC DCIS.com stiffness	ND CA1a stiffness	ND CA1a stiffness
625	2160	957.54	2120	813.89	1520	1600	3860
643.5	1820	627.05	1940	1150	1130	1720	3640
597.84	1980	1080	1940	589.52	1270	2050	5270
829.73	2.34	726.07	1510	1040	1830	3120	3570
569.77	2430	1040	1480	380.64	1650	1260	1380
585.44	1360	870.26	1880	492.05	1600	1050	1530
770.61	1490	874.34	1520	949.84	2530	3141	2170
1140	1910	530.03	880.96	760.17	1760	3140	2250
1180	2640	450.88	2130	634.96	2060	2570	2850
1160	2860	902.53	2190	673.56	1750	2270
1690	2270	936.24	1870	479.81	1630
611.24	1450	2640	2070	561.37	1440
1760	2470	1620	2650	792.04	2080
877.96	1370	687.87	2230	942.51	3110
841.57	3170	801.11		1250	3860
738	1630	2160		602.45	3500
965.8	3630	1390		707.67	2850
738.61	2880	512			2560
517.63					4300
385.53					4260
