# Supplementary material for: Cell crowding activates pro-invasive mechanotransduction pathway in high-grade DCIS via TRPV4 inhibition and cell volume reduction
Source: eLife. 2025 Apr 21;13:RP100490. doi: 10.7554/eLife.100490 (PMC12011371; doi:10.7554/eLife.100490)
Supplement: Figure 2—source data 3. [file elife-100490-fig2-data3.xlsx]

## Sheet: Sheet1
Numerical data for Figure 2D - for cell volume (um^3)
LD DCIS.com volume	LD DCIS.com volume + 2% PEG	LD DCIS.com volume + 4% PEG
8382	2846	3133
3808	4250	2866
3568	3120	3445
4432	5060	2925
6979	3493	4007
1908	5140	4200
4935	4619	2377
4036	4718	2990
4937	4032	3102
2677	5410	3525
3425	3629
2299	3381
2959	4438
3293	4750
3915	3610
7480	4432
7280	4901
6029	5160
6294.74	4110
4379.36	3307
6994.27	5236
6110.76	2131
5208.39	3562
5503.8
1531.57
7480.02
5103.1
2504.05
4198.95
5438.72
5254.47
3917.05
2496.9
5686.22
3670.3
3714.59
4860.33
2459.31
3426.13
2894.6
2944.37
2944.48
2324.24
4000.57
3987.13
4147.43
4039.36
6246.92
2371.66
6590.85
3487.24
4138.29
4021.67
2855.89
3416.82
5632
7153
5074
5014
8694
6860
8133
