# Supplementary material for: Cell crowding activates pro-invasive mechanotransduction pathway in high-grade DCIS via TRPV4 inhibition and cell volume reduction
Source: eLife. 2025 Apr 21;13:RP100490. doi: 10.7554/eLife.100490 (PMC12011371; doi:10.7554/eLife.100490)
Supplement: Figure 3—figure supplement 2—source data 1. [file elife-100490-fig3-figsupp2-data1.xlsx]

## Sheet: Sheet1
Numerical data for Figure 3 - figure supplement 2A - for line intensity plots in OC DCIS.com and OC CA1a cells
	OC DCIS.com				OC CA1a
Location (um)	TRPV4 intensity	DiI intensity	DAPI intensity	Location (um)	ca1aocnuc	ca1aocdii	ca1aoctrpv4
0	0	0	254	0	79	0	0
0.267	0.451	0	248.369	0.267	79.106	14.388	0
0.534	19.724	0	248.4	0.534	68.859	37.576	0
0.801	11.93	0.27	254.18	0.801	58.576	33.953	20.0471
1.068	4.169	0.876	254.991	1.068	56.424	38.729	0
1.335	20.917	0.139	250.917	1.335	53.529	33.941	28.2353
1.602	44.76	0	233.44	1.602	56.424	81.706	30.7059
1.869	46.1	13.698	210.547	1.869	47	86.953	57.5176
2.136	73.502	101.36	179.102	2.136	46.153	73.412	52.7176
2.403	156.16	166.34	161.09	2.403	48.141	57.506	41.6941
2.67	207.222	197.222	166.444	2.67	62.529	29.647	9.2353
2.937	214.737	206.85	142.587	2.937	62.447	18.612	7.7647
3.204	158.12	121.52	102.52	3.204	72.118	17.459	12.2
3.471	68.333	25.724	131.478	3.471	71.671	10.835	0
3.738	20.24	0.342	195.613	3.738	85.435	11.412	8.4
4.005	5	0	227.75	4.005	97.824	18.118	0
4.272	1.924	0	237.222	4.272	106.953	11.788	18.2235
4.539	1.157	0	242.524	4.539	134.6	15.4	19.2
4.806	1.28	0	246.8	4.806	141.365	13.753	21.1059
5.073	0.884	0	244.067	5.073	163.341	10.635	0
5.34	1.556	0	240	5.34	158.706	16.118	0
5.607	1.26	0	239.19	5.607	163.741	14.965	0
5.874	0.098	0	240.902	5.874	155.224	12.118	6.6706
6.141	0	0	248.79	6.141	158.435	12.988	2.4471
6.408	0	0	253.88	6.408	158.071	5.082	10.9059
6.675	0	0	247.583	6.675	160.471	0.882	1.8824
6.942	0	0	244.031	6.942	161.082	7.341	14.5882
7.209	0.07	0	246.38	7.209	165.906	11.435	0
7.476	0.436	0	239.547	7.476	160.988	3	12.8471
7.743	0	0	231.304	7.743	156.906	0	0
8.01	0	0	237	8.01	148.059	8.235	0.4706
8.277	0	0	242.918	8.277	153.682	3.224	1.0353
8.544	0	0	236.671	8.544	168.059	13.059	0
8.811	0	0	232.66	8.811	177.706	2.165	0
9.078	0.924	0	242.893	9.078	177.4	4.2	0
9.345	0.139	0.028	248.472	9.345	169.059	13.235	4.4706
9.612	2.56	0	246	9.612	188.941	5.271	0
9.879	2.153	0	241.738	9.879	206.859	9.753	0
10.146	0.756	0	233.947	10.146	211.024	5.294	3.9529
10.413	0.37	0	226.74	10.413	205.882	15.294	0.7529
10.68	4.444	0	230.444	10.68	203	15.647	0
10.947	14.134	0	230.356	10.947	217.788	19.318	0
11.214	13.08	0	207.44	11.214	212.482	11.388	0
11.481	6.929	0.019	145.961	11.481	217	14.824	0
11.748	18.293	1.938	75.476	11.748	217.129	11.624	5.8118
12.015	34	10.75	35	12.015	219.647	2.882	0
12.282	55.276	37.933	16.489	12.282	209.894	10.624	0
12.549	48.132	74.591	12.247	12.549	206.729	10.294	0
12.816	23.76	120.04	16.12	12.816	212.141	5.671	0
13.083	70.377	171.463	14.388	13.083	211.647	14.835	5.1059
13.35	179.111	200.556	13.556	13.35	191.529	2.588	0
13.617	247.41	222	17.77	13.617	167.2	9.2	0
13.884	250.911	239.48	17.156	13.884	168.165	0.165	1.8118
14.151	215.342	237.054	13.869	14.151	177.612	0	1.4235
14.418	130	177.08	33.04	14.418	164.812	6.624	1.0353
14.685	106.778	74.222	106.333	14.685	154.882	0.824	0
14.952	69.898	18.951	202.04	14.952	146.906	14.647	0.1412
15.219	18.37	0	203.68	15.219	162.953	0	0
15.486	2.364	0	173.893	15.486	167.765	4.471	1.9059
15.753	4.511	0	188.399	15.753	168.506	15.094	0.3294
16.02	9.047e-26	0	206	16.02	154.529	19.176	12
16.287	1.056	0.924	61	16.287	125.153	48.718	9.1412
16.554	5.583	0.361	62	16.554	99	47.953	8.7647
16.821	12	0	63	16.821	81.329	110.424	60.4118
17.088	0	0	64	17.088	71.706	176.612	57.5765
17.355	0	0	65	17.355	63.824	211.353	93.2353
17.622	0.5	0	66	17.622	50.353	219.694	67.1529
17.889	4.292	0	67	17.889	42.082	210.424	9.5294
18.156	3.556	0	68	18.156	35.6	199.2	15.6
18.423	0.271	0	69	18.423	34.306	157.094	7.6118
18.69	1.417	0	70	18.69	33.353	122.941	32.7059
18.957	11.028	0	71	18.957	29	82.518	16.9294
19.224	3	0	72	19.224	29.835	57.835	0
				19.491	27.541	52.459	0
				19.758	25.718	62.494	4.8941
				20.025	27.059	84.765	1.0588
				20.292	23.682	66.188	9.9882
				20.559	27	46.024	18.3882
				20.826	28.506	37.753	28.0588
				21.093	36.365	21.635	12.8824
				21.36	36.294	22.529	0.8235
				21.627	30.141	24.294	0
				21.894	26.635	15.576	6.9529
				22.161	27.141	16.141	0
				22.428	25.035	30.118	27.8941
				22.695	23	55	5
