# Supplementary material for: Cell crowding activates pro-invasive mechanotransduction pathway in high-grade DCIS via TRPV4 inhibition and cell volume reduction
Source: eLife. 2025 Apr 21;13:RP100490. doi: 10.7554/eLife.100490 (PMC12011371; doi:10.7554/eLife.100490)
Supplement: Figure 3—figure supplement 2—source data 2. [file elife-100490-fig3-figsupp2-data2.xlsx]

## Sheet: Sheet1
Numerical data for Figure 3 - figure supplement 2C - for % PM KCNN4 fraction
ND DCIS.com	OC DCIS.com
0.270081	18.3618
4.94666	20.9262
1.46116	17.0169
3.98052	19.2343
0.836556	12.8833
1.85756	17.7204
6.6149	13.1672
4.91891	16.072
3.2396	12.4583
2.13841	16.2249
5.04774	14.1705
1.31376	13.6638
2.2981	11.0762
6.81753
17.1
8.25023
4.74282
9.13514
17.1
8.25023
23.4418
4.74282
9.13514
22.8845
17.4121
20.6337
11.0199
18.4979
11.2304
14.5211
19.7414
11.1589
27.0832
4.68711
2.65339
4.30336
3.12407
4.03297
