# Supplementary material for: Cell crowding activates pro-invasive mechanotransduction pathway in high-grade DCIS via TRPV4 inhibition and cell volume reduction
Source: eLife. 2025 Apr 21;13:RP100490. doi: 10.7554/eLife.100490 (PMC12011371; doi:10.7554/eLife.100490)
Supplement: Figure 3—figure supplement 2—source data 3. [file elife-100490-fig3-figsupp2-data3.xlsx]

## Sheet: Sheet1
Numerical data for Figure 3 - figure supplement 2C - for % PM PIEZO1 fraction
ND DCIS.com	OC DCIS.com
13.3631	62.7881
27.0424	67.1892
21.5792	65.9406
36.5631	64.0539
21.777	89.4878
25.0964	64.8353
35.8836	53.4088
29.1046	44.2722
40.0165	74.9511
22.3589	74.7354
45.9256
23.7838
42.7538
29.3705
35.9923
41.263
19.3093
13.8285
26.0204
6.40897
4.70882
