# Supplementary material for: Cell crowding activates pro-invasive mechanotransduction pathway in high-grade DCIS via TRPV4 inhibition and cell volume reduction
Source: eLife. 2025 Apr 21;13:RP100490. doi: 10.7554/eLife.100490 (PMC12011371; doi:10.7554/eLife.100490)
Supplement: Figure 3—figure supplement 3—source data 1. [file elife-100490-fig3-figsupp3-data1.xlsx]

## Sheet: Sheet1
Numerical data for Figure 3 - figure supplement 3 - for % TRPV4 intensity
			ND 10A											OC 10A
Plasma Membrane	11.1487	5.37997	15.3042	16.9858	18.3892	12.2695		8.73593	13.3543	4.92695	10.4718	9.65803	9.11535	5.72289	9.54281	21.921	6.53993	13.0044	13.4258
Cytosol	23.4421	32.2288	26.2822	31.4964	46.9239	30.2638		33.5732	34.3802	39.7225	35.6324	43.8817	32.1392	45.1683	37.3568	32.6649	34.2707	35.8808	33.6731
Nuclei	65.4092	62.3912	58.4136	51.5177	34.6869	57.4668		32.4862	34.1054	38.9076	28.4377	34.8473	27.1107	7.06578	37.5753	29.1266	39.5976	39.1071	45.2735
			ND AT1										OC AT1
Plasma Membrane	3.04483	2.14129	4.06012	21.2405	18.3001	8.07428		1.59329	0.0608313	4.62484	3.14496	13.6661	10.1401	12.0059	6.8118	0.72872	4.63803	6.44911
Cytosol	19.1975	24.1935	30.5949	27.2085	21.5646	34.5305		94.7	93.792	87.104	90.621	63.371	81.718	72.007	71.531	92.032	88.489	77.709
Nuclei	77.7577	73.6652	65.345	51.5511	60.1353	57.3952		3.70701	6.14733	8.27109	6.23449	22.9632	8.14185	15.9868	13.346	7.23897	6.87251	15.8422
						ND DCIS.com												OC DCIS.com
Plasma Membrane	11.7773	17.4217	12.9954	20.7674	19.5607	18.2041	21.7825	4.74158	8.04364	7.0182	14.0788	7.6187		89.2111	67.495	91.4611	65.9143	62.5835	72.7446	78.4624	76.9254
Cytosol	25.363	31.207	21.512	25.214	35.26	37.753	32.175	28.526	26.711	28.154	34.797	28.691		8.343	27.714	5.347	23.136	24.802	16.093	18.47	19.951
Nuclei	62.8593	51.3714	65.4925	54.0183	45.1791	44.0426	46.0424	66.7327	65.2451	64.8282	51.1247	63.6905		2.44569	4.79131	3.1914	10.95	12.6141	11.1623	3.06721	3.12399
					ND DCIS.com												OC CA1a
Plasma Membrane	33.225	25.4301	42.9606	45.005	16.2129	41.4902	26.3418	28.5446	35.445	31.1553		65.8637	72.1974	68.4258	87.7514	86.0889	68.1166	87.2408	79.4985	71.0847	84.4279
Cytosol	50.767	57.811	46.158	47.077	49.101	57.032	67.6	60.278	57.26	49.278		21.57	22.227	24.793	5.302	7.706	20.774	9.387	14.905	21.615	12.654
Nuclei	16.0079	16.7586	10.8818	7.91832	34.686	1.47824	6.05867	11.177	7.29538	19.567		12.5668	5.57538	6.78075	6.94686	6.20528	11.109	3.37245	5.59605	7.30047	2.91801
				ND 10A									ND 10A 4% PEG 15 min
Plasma Membrane	11.1487	5.37997	15.3042	16.9858	18.3892	12.2695		9.93686	3.98388	8.1151	4.76608	6.89379	8.40676	9.18718	9.98219	8.27139	4.08561
Cytosol	23.4421	32.2288	26.2822	31.4964	46.9239	30.2638		25.474	35.332	32.857	9.585	26.136	26.05	27.027	34.591	23.272	33.881
Nuclei	65.4092	62.3912	58.4136	51.5177	34.6869	57.4668		64.5894	60.6838	59.0275	85.649	66.9705	65.5433	63.7862	55.4269	68.4567	62.033
				ND AT1								ND AT1 4% PEG 15 min
Plasma Membrane	3.04483	2.14129	4.06012	21.2405	18.3001	8.07428		2.97821	2.58644	5.15268	4.58308	5.64495	1.68034	6.26453	5.43453	6.27759
Cytosol	19.1975	24.1935	30.5949	27.2085	21.5646	34.5305		16.06	23.274	8.439	33.434	9.514	30.811	16.58	29.521	25.521
Nuclei	77.7577	73.6652	65.345	51.5511	60.1353	57.3952		80.9617	74.1393	86.4078	61.9833	84.8406	67.5088	77.1556	65.0441	68.2014
						DCIS ND CTRL													DCIS ND 2% PEG 15 min											DCIS ND 4% PEG 15 min
Plasma Membrane	11.7773	17.4217	12.9954	20.7674	19.5607	18.2041	21.7825	4.74158	8.04364	7.0182	14.0788	7.6187		59.6578	57.9468	49.4377	49.2258	68.2582	44.5294	50.5997	51.9282	67.512	53.2592		47.3054	50.8452	64.9314	61.8304	56.6322	61.3369	59.749	54.4246	54.5117	60.7866	67.5017	73.9273
Cytosol	25.363	31.207	21.512	25.214	35.26	37.753	32.175	28.526	26.711	28.154	34.797	28.691		25.127	13.916	20.922	16.921	10.012	27.428	20.242	9.229	11.467	5.247		23.295	20.94	10.778	12.266	13.649	11.391	17.853	16.232	11.356	14.135	14.292	13.713
Nuclei	62.8593	51.3714	65.4925	54.0183	45.1791	44.0426	46.0424	66.7327	65.2451	64.8282	51.1247	63.6905		15.2153	28.1374	29.64	33.8527	21.7299	28.0428	29.1585	38.8424	21.0207	41.4942		29.3994	28.2148	24.2902	25.904	29.7186	27.2719	22.3979	29.3437	34.1325	25.0785	18.2066	12.3599
					ND CA1a												ND CA1a 4% PEG 15 min
Plasma Membrane	33.225	25.4301	42.9606	45.005	16.2129	41.4902	26.3418	28.5446	35.445	31.1553		47.5409	47.5409	40.6382	58.201	60.1171	69.5329	37.2705	32.7169	26.039	46.8139	39.1732
Cytosol	50.767	57.811	46.158	47.077	49.101	57.032	67.6	60.278	57.26	49.278		32.705	32.705	36.238	29.364	33.066	19.954	28.374	24.836	20.017	38.177	27.565
Nuclei	16.0079	16.7586	10.8818	7.91832	34.686	1.47824	6.05867	11.177	7.29538	19.567		19.7536	19.7536	23.1236	12.435	6.8167	10.5127	34.3552	42.4476	53.9443	15.009	33.2615
