# Supplementary material for: Cell crowding activates pro-invasive mechanotransduction pathway in high-grade DCIS via TRPV4 inhibition and cell volume reduction
Source: eLife. 2025 Apr 21;13:RP100490. doi: 10.7554/eLife.100490 (PMC12011371; doi:10.7554/eLife.100490)
Supplement: Figure 3—figure supplement 4—source data 1. [file elife-100490-fig3-figsupp4-data1.xlsx]

## Sheet: Sheet1
Numerical data for Figure 3 - figure supplement 4B - for % PM TRPV4 in MCF10DCIS.com cells
ND ctrl	ND + 74.4 mOsm/L PEG 300 for 15 min
44.7655	49.2159
1.2673	68.38
0.8419	53.8758
1.1962	66.2272
1.0035	52.7185
0.5797	45.6589
0.4782	55.3924
0.7454	64.4194
1.1064	84.3536
0.1251	58.1701
1.7644	73.3564
0.6822	55.4415
																																54.4246	54.5117	60.7866	67.5017	73.9273
																																16.232	11.356	14.135	14.292	13.713
																																29.3437	34.1325	25.0785	18.2066	12.3599
