# Supplementary material for: Cell crowding activates pro-invasive mechanotransduction pathway in high-grade DCIS via TRPV4 inhibition and cell volume reduction
Source: eLife. 2025 Apr 21;13:RP100490. doi: 10.7554/eLife.100490 (PMC12011371; doi:10.7554/eLife.100490)
Supplement: Figure 3—figure supplement 5—source data 1. [file elife-100490-fig3-figsupp5-data1.xlsx]

## Sheet: Sheet1
Numerical data for Figure 3 - figure supplement 5C - for % PM TRPV4 in MCF10DCIS.com cells
ND ctrl	ND + 74.4 mOsm/L PEG 300 for 15 min	ND reseeded	ND reseeded + 74.4 mOsm/L PEG 300 for 15 min
11.7773	47.3054	33.7522	59.9655
17.4217	50.8452	3.0621	47.177
12.9954	64.9314	8.141	50.7367
20.7674	61.8304	13.4371	48.7229
19.5607	56.6322	18.2464	53.6661
18.2041	61.3369	14.6897	54.7873
21.7825	59.749	9.1585	71.6147
4.74158	54.4246	28.2149	72.2373
8.04364	54.5117	12.5185	52.2189
7.0182	60.7866	19.8802	57.1721
14.0788	67.5017	17.6585	65.8056
7.6187	73.9273	14.0172	52.125
		26.3595	65.6344
		23.6434	61.119
		43.665	53.8365
																																54.4246	54.5117	60.7866	67.5017	73.9273
																																16.232	11.356	14.135	14.292	13.713
																																29.3437	34.1325	25.0785	18.2066	12.3599
