# Supplementary material for: Cell crowding activates pro-invasive mechanotransduction pathway in high-grade DCIS via TRPV4 inhibition and cell volume reduction
Source: eLife. 2025 Apr 21;13:RP100490. doi: 10.7554/eLife.100490 (PMC12011371; doi:10.7554/eLife.100490)
Supplement: Figure 3—source data 1. [file elife-100490-fig3-data1.xlsx]

## Sheet: Sheet2
Numerical data for Figure 3A - for the original and analyzed mass spectrometry data (D = OC; A = ND)
Gene names	normalized intensity A1	normalized intensity A2	normalized intensity A3	normalized intensity D1	normalized intensity D2	normalized intensity D3	Avg A	Avg D	fold (=D/A)	Stdev A	Stdev D	A = ND		Gene names	Avg A	Avg D	Stdev A	Stdev D
TRPV4		0.000609668		0.0589154	0.113275	0.107658	0.000609668	0.093283	153.006	#DIV/0!	0.0298954	D = OC		TRPV4	0.000609668	0.093283	#DIV/0!	0.0298954
IVL	0.000564532	0.00055828		0.0254598	0.0485229	0.0192378	0.000561406	0.0310735	55.3494	4.42094e-06	0.0154285			IVL	0.000561406	0.0310735	4.42094e-06	0.0154285
SCN11A;SCN5A;SCN10A;SCN9A	0.000412496			0.0172495			0.000412496	0.0172495	41.8175	#DIV/0!	#DIV/0!			SCN11A;SCN5A;SCN10A;SCN9A	0.000412496	0.0172495	#DIV/0!	#DIV/0!
HNRNPM		0.000412009		0.00974073	0.00910224	0.0144189	0.000412009	0.0110873	26.9103	#DIV/0!	0.00290289			HNRNPM	0.000412009	0.0110873	#DIV/0!	0.00290289
COPG2	0.00269441		0.00240877	0.0911991		0.00235961	0.00255159	0.0467794	18.3334	0.000201975	0.062819			COPG2	0.00255159	0.0467794	0.000201975	0.062819
S100P	0.0052342	0.00187208	0.00249275	0.0732805	0.0618454	0.0377075	0.00319968	0.0576111	18.0053	0.00178907	0.0181606			S100P	0.00319968	0.0576111	0.00178907	0.0181606
MRPL16		0.00403006		0.0518408	0.0602585	0.0624578	0.00403006	0.0581857	14.4379	#DIV/0!	0.00560377			MRPL16	0.00403006	0.0581857	#DIV/0!	0.00560377
IDH2		0.00154962		0.0109024	0.0148329	0.0141324	0.00154962	0.0132892	8.57579	#DIV/0!	0.00209652			IDH2	0.00154962	0.0132892	#DIV/0!	0.00209652
EML4	0.000990928			0.0107152	0.00681413	0.00608532	0.000990928	0.00787154	7.9436	#DIV/0!	0.00248947		`	EML4	0.000990928	0.00787154	#DIV/0!	0.00248947
GSN	0.00114337	0.00176879		0.00841412	0.00963508	0.0164119	0.00145608	0.011487	7.889	0.000442233	0.00430851			GSN	0.00145608	0.011487	0.000442233	0.00430851
CKAP4	0.0213236	0.0229711	0.0149637	0.104249	0.210549	0.148477	0.0197528	0.154425	7.81787	0.00422847	0.0533987			CKAP4	0.0197528	0.154425	0.00422847	0.0533987
PRSS8			0.0022137	0.00561282	0.0250657		0.0022137	0.0153392	6.92924	#DIV/0!	0.0137552			PRSS8	0.0022137	0.0153392	#DIV/0!	0.0137552
MFI2	0.000957717		0.00282812	0.0121692	0.0176326	0.00911	0.00189292	0.0129706	6.85218	0.00132257	0.00431743			MFI2	0.00189292	0.0129706	0.00132257	0.00431743
CEACAM1	0.00332034	0.00298452	0.00584178	0.0194908	0.0296608	0.0338927	0.00404888	0.0276815	6.83682	0.00156175	0.00740218			CEACAM1	0.00404888	0.0276815	0.00156175	0.00740218
ADGRL3;LPHN3	0.00329409	0.0210132	0.0202667	0.0940439	0.134738	0.0753212	0.014858	0.101368	6.82244	0.0100216	0.030378			ADGRL3;LPHN3	0.014858	0.101368	0.0100216	0.030378
HNRNPC			0.000894468			0.00606698	0.000894468	0.00606698	6.78279	#DIV/0!	#DIV/0!			HNRNPC	0.000894468	0.00606698	#DIV/0!	#DIV/0!
RPL7L1	0.000531197				0.00576259	0.00118219	0.000531197	0.00347239	6.53692	#DIV/0!	0.00323884			RPL7L1	0.000531197	0.00347239	#DIV/0!	0.00323884
NDUFV1	0.00150929	0.00708532	0.00357425	0.0309139	0.0206076	0.0238639	0.00405629	0.0251285	6.19495	0.0028191	0.00526824			NDUFV1	0.00405629	0.0251285	0.0028191	0.00526824
HIST1H2AJ;HIST1H2AH;H2AFJ;HIST1H2AD;HIST1H2AG;HIST2H2AC;HIST2H2AA3;H2AFX	0.0156194	0.028253	0.0166493	0.0337825	0.0164314	0.316984	0.0201739	0.122399	6.06722	0.00701563	0.168739			HIST1H2AJ;HIST1H2AH;H2AFJ;HIST1H2AD;HIST1H2AG;HIST2H2AC;HIST2H2AA3;H2AFX	0.0201739	0.122399	0.00701563	0.168739
GTF2I	0.00156588	0.00393518	0.000818186	0.0116723	0.00422968	0.0212278	0.00210641	0.0123766	5.87567	0.00162728	0.00852092			GTF2I	0.00210641	0.0123766	0.00162728	0.00852092
ERP44	0.00195907	0.005107	0.00335201	0.0523255	0.0053143	0.00288227	0.00347269	0.020174	5.80934	0.00157743	0.0278706			ERP44	0.00347269	0.020174	0.00157743	0.0278706
KCNN4		0.00245817	0.00278958	0.0167245	0.016532	0.010864	0.00262387	0.0147068	5.60501	0.000234344	0.00332938			KCNN4	0.00262387	0.0147068	0.000234344	0.00332938
NDUFB9		0.00384653		0.0215074			0.00384653	0.0215074	5.59138	#DIV/0!	#DIV/0!			NDUFB9	0.00384653	0.0215074	#DIV/0!	#DIV/0!
RPL32		0.00178939	0.000114293	0.00794743	0.00590382	0.00177783	0.000951841	0.00520969	5.47328	0.00118447	0.00314283			RPL32	0.000951841	0.00520969	0.00118447	0.00314283
OCLN		0.00078423	0.00107231	0.00278639	0.00450939	0.00789086	0.000928269	0.00506221	5.45339	0.000203702	0.00259675			OCLN	0.000928269	0.00506221	0.000203702	0.00259675
PCCB	0.00442645	0.00781737	0.0087053	0.03635	0.0411164	0.0349257	0.00698304	0.037464	5.365	0.00225815	0.00324222			PCCB	0.00698304	0.037464	0.00225815	0.00324222
PTPRF	0.015965	0.0078887	0.0102473	0.0416205	0.0755337	0.0639548	0.011367	0.0603696	5.31095	0.00415294	0.0172385			PTPRF	0.011367	0.0603696	0.00415294	0.0172385
CTSD	0.0240463	0.0202178	0.0253263	0.122362	0.134256	0.087426	0.0231968	0.114681	4.94385	0.00265808	0.0243415			CTSD	0.0231968	0.114681	0.00265808	0.0243415
P4HA1	0.00773626	0.0247597	0.0134168	0.0743248	0.0907731	0.0512675	0.0153042	0.0721218	4.71254	0.00866724	0.0198447			P4HA1	0.0153042	0.0721218	0.00866724	0.0198447
PEX16		0.00177654	0.000728347	0.010157	0.00449809	0.00235939	0.00125244	0.00567149	4.52834	0.000741186	0.00402906			PEX16	0.00125244	0.00567149	0.000741186	0.00402906
NDUFS1	0.0359159	0.0433825	0.00924315	0.106417	0.140324	0.149971	0.0295138	0.132237	4.48052	0.0179475	0.0228755			NDUFS1	0.0295138	0.132237	0.0179475	0.0228755
SLC27A1	0.00198261	0.00218679	0.00188607	0.00652459	0.00720075	0.0122326	0.00201849	0.00865264	4.28669	0.000153533	0.00311869			SLC27A1	0.00201849	0.00865264	0.000153533	0.00311869
SUN2	0.00078718	0.000767851	0.00105274	0.00584292	0.00221904	0.00291288	0.000869257	0.00365828	4.20851	0.000159195	0.0019235			SUN2	0.000869257	0.00365828	0.000159195	0.0019235
HIST1H2BN;HIST1H2BL;HIST1H2BM;HIST1H2BH;HIST2H2BF;HIST1H2BC;HIST1H2BD;H2BFS;HIST1H2BK;HIST2H2BE;HIST1H2BB;HIST1H2BO;HIST1H2BJ;HIST3H2BB;HIST1H2BA	0.0319505	0.0230542	0.02066	0.0412884	0.0295744	0.246672	0.0252216	0.105845	4.19661	0.00594912	0.122101			HIST1H2BN;HIST1H2BL;HIST1H2BM;HIST1H2BH;HIST2H2BF;HIST1H2BC;HIST1H2BD;H2BFS;HIST1H2BK;HIST2H2BE;HIST1H2BB;HIST1H2BO;HIST1H2BJ;HIST3H2BB;HIST1H2BA	0.0252216	0.105845	0.00594912	0.122101
HSPB1	0.192505	0.0886938	0.131501	0.573021	0.678595	0.472124	0.137566	0.57458	4.17675	0.0521705	0.103245			HSPB1	0.137566	0.57458	0.0521705	0.103245
PSPC1		0.00279971	0.00594259	0.0296269	0.0151571	0.00739642	0.00437115	0.0173935	3.97916	0.00222235	0.0112827			PSPC1	0.00437115	0.0173935	0.00222235	0.0112827
GPX1		0.00102324		0.00235153		0.00575964	0.00102324	0.00405558	3.96349	#DIV/0!	0.00240989			GPX1	0.00102324	0.00405558	#DIV/0!	0.00240989
SLC26A2	0.00129199	0.00141571	0.00885479	0.0139625	0.0197398	0.0120875	0.00385416	0.0152633	3.96021	0.00433111	0.00398854			SLC26A2	0.00385416	0.0152633	0.00433111	0.00398854
PLCD3	0.00573604	0.0116223	0.0142844	0.0443219	0.0468379	0.0326786	0.0105476	0.0412795	3.91364	0.00437433	0.00755404			PLCD3	0.0105476	0.0412795	0.00437433	0.00755404
SLC25A12		0.00209135		0.00341577	0.00867165	0.0120629	0.00209135	0.00805012	3.84925	#DIV/0!	0.00435696			SLC25A12	0.00209135	0.00805012	#DIV/0!	0.00435696
ECHS1		0.00305395		0.0115967			0.00305395	0.0115967	3.79727	#DIV/0!	#DIV/0!			ECHS1	0.00305395	0.0115967	#DIV/0!	#DIV/0!
S100A6	0.205136	0.0393206	0.10518	0.575924	0.451064	0.295756	0.116545	0.440914	3.7832	0.0834897	0.140359			S100A6	0.116545	0.440914	0.0834897	0.140359
NSFL1C			0.000869537		0.00315653		0.000869537	0.00315653	3.63012	#DIV/0!	#DIV/0!			NSFL1C	0.000869537	0.00315653	#DIV/0!	#DIV/0!
LCN2	0.00314143	0.00282083	0.00238419	0.015673	0.00700125	0.00739642	0.00278215	0.0100236	3.60281	0.0003801	0.00489657			LCN2	0.00278215	0.0100236	0.0003801	0.00489657
ST14	0.0406815	0.0308789	0.0497765	0.183976	0.128063	0.120933	0.0404456	0.144324	3.56834	0.00945103	0.034524			ST14	0.0404456	0.144324	0.00945103	0.034524
NSUN5			0.00136095	0.00173043	0.00719734	0.00543489	0.00136095	0.00478755	3.51781	#DIV/0!	0.00279035			NSUN5	0.00136095	0.00478755	#DIV/0!	0.00279035
RPL9	0.222114	0.248282	0.206277	0.997263	0.802868	0.556049	0.225558	0.785393	3.482	0.0212133	0.221126			RPL9	0.225558	0.785393	0.0212133	0.221126
ALDOC	0.0199033	0.0422813	0.0189432	0.061117	0.150848	0.0699148	0.0270426	0.0939599	3.47451	0.0132058	0.0494624			ALDOC	0.0270426	0.0939599	0.0132058	0.0494624
ACADM	0.00501307	0.0048743	0.00539879	0.0210356	0.0188221	0.0104208	0.00509539	0.0167595	3.28916	0.000271762	0.00559994			ACADM	0.00509539	0.0167595	0.000271762	0.00559994
RPL17;RPL17-C18orf32	0.0332849	0.0100956	0.0211333	0.0934822	0.0766908	0.0405572	0.0215046	0.0702434	3.26644	0.0115991	0.0270451			RPL17;RPL17-C18orf32	0.0215046	0.0702434	0.0115991	0.0270451
GLUD1;GLUD2	0.0125127	0.0201531	0.0154614	0.0418977	0.061729	0.0518074	0.0160424	0.0518114	3.22966	0.00385318	0.00991564			GLUD1;GLUD2	0.0160424	0.0518114	0.00385318	0.00991564
SFPQ	0.0398591	0.0474652	0.0223654	0.118876	0.123475	0.0946153	0.0365632	0.112322	3.072	0.0128704	0.015506			SFPQ	0.0365632	0.112322	0.0128704	0.015506
TPP1	0.000898207	0.00989231	0.0032797	0.0182485	0.0160266	0.00879168	0.00469007	0.0143556	3.06085	0.00465997	0.00494489			TPP1	0.00469007	0.0143556	0.00465997	0.00494489
PTPRK	0.00333573	0.00728582	0.0148575	0.0142009	0.00763516	0.0561109	0.00849301	0.0259823	3.05926	0.00585496	0.0262978			PTPRK	0.00849301	0.0259823	0.00585496	0.0262978
RPS15	0.0618317	0.205565	0.120362	0.694699	0.241962	0.240927	0.129253	0.392529	3.03691	0.0722778	0.261687			RPS15	0.129253	0.392529	0.0722778	0.261687
ADGRL2;LPHN2;ADGRL1;LPHN1			0.00225929	0.00809435	0.00991189	0.00251465	0.00225929	0.0068403	3.02763	#DIV/0!	0.00385477			ADGRL2;LPHN2;ADGRL1;LPHN1	0.00225929	0.0068403	#DIV/0!	0.00385477
IGF1R			0.00222701	0.00975657	0.00442178	0.00583925	0.00222701	0.00667253	2.99619	#DIV/0!	0.00276329			IGF1R	0.00222701	0.00667253	#DIV/0!	0.00276329
SRP14	0.0223123	0.0120555	0.0123972	0.06104	0.0403392	0.0373697	0.0155884	0.0462496	2.96693	0.00582564	0.0128946			SRP14	0.0155884	0.0462496	0.00582564	0.0128946
THEM6	0.00345755			0.00610104	0.0150973	0.00941677	0.00345755	0.010205	2.95152	#DIV/0!	0.00454961			THEM6	0.00345755	0.010205	#DIV/0!	0.00454961
NDUFA9	0.0143914	0.0189643	0.00505016	0.0416889	0.0383998	0.0326115	0.0128019	0.0375667	2.93446	0.00709192	0.00459566			NDUFA9	0.0128019	0.0375667	0.00709192	0.00459566
RPS9	0.0891241	0.0335854	0.0504718	0.240418	0.155694	0.10877	0.0577271	0.168294	2.91534	0.0284713	0.0667222			RPS9	0.0577271	0.168294	0.0284713	0.0667222
UGP2	0.0289972	0.0507133	0.0336452	0.111408	0.109235	0.10916	0.0377853	0.109934	2.90945	0.0114347	0.00127677			UGP2	0.0377853	0.109934	0.0114347	0.00127677
AIMP2	0.00286559	0.00463155		0.00628045	0.0162361	0.0101884	0.00374857	0.0109016	2.90821	0.00124872	0.00501599			AIMP2	0.00374857	0.0109016	0.00124872	0.00501599
ECH1	0.034251	0.0500796	0.0305423	0.123313	0.119451	0.0886675	0.038291	0.110477	2.8852	0.0103763	0.0189862			ECH1	0.038291	0.110477	0.0103763	0.0189862
LPGAT1	0.000482498	0.00659706	0.00431963	0.00856896	0.00883957	0.0153306	0.00379973	0.010913	2.87206	0.00309026	0.0038281			LPGAT1	0.00379973	0.010913	0.00309026	0.0038281
NONO	0.0194897	0.0202126	0.0115202	0.0613525	0.0556434	0.0300808	0.0170742	0.0490256	2.87133	0.00482346	0.0166531			NONO	0.0170742	0.0490256	0.00482346	0.0166531
MAP2K2	0.00472502	0.0140782	0.0090882	0.0225546	0.0270831	0.030358	0.00929714	0.0266652	2.86811	0.00468008	0.00391848			MAP2K2	0.00929714	0.0266652	0.00468008	0.00391848
DSC2	0.00360033	0.00293964	0.00420868	0.00718711	0.0184904	0.00498167	0.00358289	0.0102197	2.85238	0.000634699	0.00724703			DSC2	0.00358289	0.0102197	0.000634699	0.00724703
IARS2	0.00102209			0.00264206		0.00309528	0.00102209	0.00286867	2.80668	#DIV/0!	0.000320475			IARS2	0.00102209	0.00286867	#DIV/0!	0.000320475
LEMD2		0.00198037	0.00291925	0.00604364	0.00633516	0.00810885	0.00244981	0.00682922	2.78766	0.000663891	0.00111774			LEMD2	0.00244981	0.00682922	0.000663891	0.00111774
DECR1	0.0153969	0.012887	0.0239745	0.0412841	0.0735686	0.0287859	0.0174195	0.0478795	2.74862	0.00581388	0.0231084			DECR1	0.0174195	0.0478795	0.00581388	0.0231084
CAPNS1	0.0121136	0.0143923	0.0156853	0.0527699	0.0263824	0.0345554	0.0140637	0.0379025	2.69505	0.00180838	0.0135084			CAPNS1	0.0140637	0.0379025	0.00180838	0.0135084
RPS13	0.261222	0.208764	0.136487	0.724235	0.54	0.361094	0.202158	0.541776	2.67997	0.0626292	0.181577			RPS13	0.202158	0.541776	0.0626292	0.181577
RASA1	0.00219954			0.00344804	0.00761072	0.00616234	0.00219954	0.00574037	2.60981	#DIV/0!	0.00211318			RASA1	0.00219954	0.00574037	#DIV/0!	0.00211318
SLC25A1	0.034946	0.00270694	0.0104768	0.0729852	0.00827598	0.0435636	0.0160432	0.0416083	2.59351	0.0168249	0.0323989			SLC25A1	0.0160432	0.0416083	0.0168249	0.0323989
TPD52	0.00136462			0.00384717	0.00321081		0.00136462	0.00352899	2.58606	#DIV/0!	0.000449979			TPD52	0.00136462	0.00352899	#DIV/0!	0.000449979
ALDH5A1			0.000312565		0.000470823	0.00110286	0.000312565	0.000786841	2.51737	#DIV/0!	0.000446917			ALDH5A1	0.000312565	0.000786841	#DIV/0!	0.000446917
PAPSS1			0.0015958		0.00410141	0.00347632	0.0015958	0.00378887	2.37428	#DIV/0!	0.000442004			PAPSS1	0.0015958	0.00378887	#DIV/0!	0.000442004
DHRS9	0.00227881			0.00702982	0.00474289	0.00427061	0.00227881	0.00534777	2.34674	#DIV/0!	0.00147571			DHRS9	0.00227881	0.00534777	#DIV/0!	0.00147571
CLDN4;CLDN9;CLDN6;CLDN3	0.0107377		0.00458472	0.0256896	0.0102319	0.0138971	0.00766119	0.0166062	2.16757	0.00435078	0.00807709			CLDN4;CLDN9;CLDN6;CLDN3	0.00766119	0.0166062	0.00435078	0.00807709

## Sheet: Sheet3
Gene names	Avg A	Avg D	Stdev A	Stdev D
TRPV4	0.000609668	0.093283	#DIV/0!	0.0298954
IVL	0.000561406	0.0310735	4.42094e-06	0.0154285
SCN11A;SCN5A;SCN10A;SCN9A	0.000412496	0.0172495	#DIV/0!	#DIV/0!
HNRNPM	0.000412009	0.0110873	#DIV/0!	0.00290289
COPG2	0.00255159	0.0467794	0.000201975	0.062819
S100P	0.00319968	0.0576111	0.00178907	0.0181606
MRPL16	0.00403006	0.0581857	#DIV/0!	0.00560377
IDH2	0.00154962	0.0132892	#DIV/0!	0.00209652
EML4	0.000990928	0.00787154	#DIV/0!	0.00248947
GSN	0.00145608	0.011487	0.000442233	0.00430851
CKAP4	0.0197528	0.154425	0.00422847	0.0533987
PRSS8	0.0022137	0.0153392	#DIV/0!	0.0137552
MFI2	0.00189292	0.0129706	0.00132257	0.00431743
CEACAM1	0.00404888	0.0276815	0.00156175	0.00740218
ADGRL3;LPHN3	0.014858	0.101368	0.0100216	0.030378
HNRNPC	0.000894468	0.00606698	#DIV/0!	#DIV/0!
RPL7L1	0.000531197	0.00347239	#DIV/0!	0.00323884
NDUFV1	0.00405629	0.0251285	0.0028191	0.00526824
HIST1H2AJ;HIST1H2AH;H2AFJ;HIST1H2AD;HIST1H2AG;HIST2H2AC;HIST2H2AA3;H2AFX	0.0201739	0.122399	0.00701563	0.168739
GTF2I	0.00210641	0.0123766	0.00162728	0.00852092
ERP44	0.00347269	0.020174	0.00157743	0.0278706
KCNN4	0.00262387	0.0147068	0.000234344	0.00332938
NDUFB9	0.00384653	0.0215074	#DIV/0!	#DIV/0!
RPL32	0.000951841	0.00520969	0.00118447	0.00314283
OCLN	0.000928269	0.00506221	0.000203702	0.00259675
PCCB	0.00698304	0.037464	0.00225815	0.00324222
PTPRF	0.011367	0.0603696	0.00415294	0.0172385
CTSD	0.0231968	0.114681	0.00265808	0.0243415
P4HA1	0.0153042	0.0721218	0.00866724	0.0198447
PEX16	0.00125244	0.00567149	0.000741186	0.00402906
NDUFS1	0.0295138	0.132237	0.0179475	0.0228755
SLC27A1	0.00201849	0.00865264	0.000153533	0.00311869
SUN2	0.000869257	0.00365828	0.000159195	0.0019235
HIST1H2BN;HIST1H2BL;HIST1H2BM;HIST1H2BH;HIST2H2BF;HIST1H2BC;HIST1H2BD;H2BFS;HIST1H2BK;HIST2H2BE;HIST1H2BB;HIST1H2BO;HIST1H2BJ;HIST3H2BB;HIST1H2BA	0.0252216	0.105845	0.00594912	0.122101
HSPB1	0.137566	0.57458	0.0521705	0.103245
PSPC1	0.00437115	0.0173935	0.00222235	0.0112827
GPX1	0.00102324	0.00405558	#DIV/0!	0.00240989
SLC26A2	0.00385416	0.0152633	0.00433111	0.00398854
PLCD3	0.0105476	0.0412795	0.00437433	0.00755404
SLC25A12	0.00209135	0.00805012	#DIV/0!	0.00435696
ECHS1	0.00305395	0.0115967	#DIV/0!	#DIV/0!
S100A6	0.116545	0.440914	0.0834897	0.140359
NSFL1C	0.000869537	0.00315653	#DIV/0!	#DIV/0!
LCN2	0.00278215	0.0100236	0.0003801	0.00489657
ST14	0.0404456	0.144324	0.00945103	0.034524
NSUN5	0.00136095	0.00478755	#DIV/0!	0.00279035
RPL9	0.225558	0.785393	0.0212133	0.221126
ALDOC	0.0270426	0.0939599	0.0132058	0.0494624
ACADM	0.00509539	0.0167595	0.000271762	0.00559994
RPL17;RPL17-C18orf32	0.0215046	0.0702434	0.0115991	0.0270451
GLUD1;GLUD2	0.0160424	0.0518114	0.00385318	0.00991564
SFPQ	0.0365632	0.112322	0.0128704	0.015506
TPP1	0.00469007	0.0143556	0.00465997	0.00494489
PTPRK	0.00849301	0.0259823	0.00585496	0.0262978
RPS15	0.129253	0.392529	0.0722778	0.261687
ADGRL2;LPHN2;ADGRL1;LPHN1	0.00225929	0.0068403	#DIV/0!	0.00385477
IGF1R	0.00222701	0.00667253	#DIV/0!	0.00276329
SRP14	0.0155884	0.0462496	0.00582564	0.0128946
THEM6	0.00345755	0.010205	#DIV/0!	0.00454961
NDUFA9	0.0128019	0.0375667	0.00709192	0.00459566
RPS9	0.0577271	0.168294	0.0284713	0.0667222
UGP2	0.0377853	0.109934	0.0114347	0.00127677
AIMP2	0.00374857	0.0109016	0.00124872	0.00501599
ECH1	0.038291	0.110477	0.0103763	0.0189862
LPGAT1	0.00379973	0.010913	0.00309026	0.0038281
NONO	0.0170742	0.0490256	0.00482346	0.0166531
MAP2K2	0.00929714	0.0266652	0.00468008	0.00391848
DSC2	0.00358289	0.0102197	0.000634699	0.00724703
IARS2	0.00102209	0.00286867	#DIV/0!	0.000320475
LEMD2	0.00244981	0.00682922	0.000663891	0.00111774
DECR1	0.0174195	0.0478795	0.00581388	0.0231084
CAPNS1	0.0140637	0.0379025	0.00180838	0.0135084
RPS13	0.202158	0.541776	0.0626292	0.181577
RASA1	0.00219954	0.00574037	#DIV/0!	0.00211318
SLC25A1	0.0160432	0.0416083	0.0168249	0.0323989
TPD52	0.00136462	0.00352899	#DIV/0!	0.000449979
ALDH5A1	0.000312565	0.000786841	#DIV/0!	0.000446917
PAPSS1	0.0015958	0.00378887	#DIV/0!	0.000442004
DHRS9	0.00227881	0.00534777	#DIV/0!	0.00147571
CLDN4;CLDN9;CLDN6;CLDN3	0.00766119	0.0166062	0.00435078	0.00807709
