# Supplementary material for: Cell crowding activates pro-invasive mechanotransduction pathway in high-grade DCIS via TRPV4 inhibition and cell volume reduction
Source: eLife. 2025 Apr 21;13:RP100490. doi: 10.7554/eLife.100490 (PMC12011371; doi:10.7554/eLife.100490)
Supplement: Figure 3—source data 6. [file elife-100490-fig3-data6.xlsx]

## Sheet: Sheet1
Numerical data for Figure 3E - for % PM TRPV4 fraction
ND 10A	OC 10A	ND AT1	OC AT1	ND DCIS.com	OC DCIS.com	ND CA1a	OC CA1a
11.1487	8.73593	3.04483	1.59329	11.7773	89.2111	33.225	65.8637
5.37997	13.3543	2.14129	0.0608313	17.4217	67.495	25.4301	72.1974
15.3042	4.92695	4.06012	4.62484	12.9954	91.4611	42.9606	68.4258
16.9858	10.4718	21.2405	3.14496	20.7674	65.9143	45.005	87.7514
18.3892	9.65803	18.3001	13.6661	19.5607	62.5835	16.2129	86.0889
12.2695	9.11535	8.07428	10.1401	18.2041	72.7446	41.4902	68.1166
	5.72289		12.0059	21.7825	78.4624	26.3418	87.2408
	9.54281		6.8118	4.74158	76.9254	28.5446	79.4985
	21.921		0.72872	8.04364		35.445	71.0847
	6.53993		4.63803	7.0182		31.1553	84.4279
	13.0044		6.44911	14.0788
	13.4258			7.6187
