# Supplementary material for: Cell crowding activates pro-invasive mechanotransduction pathway in high-grade DCIS via TRPV4 inhibition and cell volume reduction
Source: eLife. 2025 Apr 21;13:RP100490. doi: 10.7554/eLife.100490 (PMC12011371; doi:10.7554/eLife.100490)
Supplement: Figure 4—figure supplement 1—source data 1. [file elife-100490-fig4-figsupp1-data1.xlsx]

## Sheet: Sheet1
Numerical data for Figure 4 - figure supplement 1A - for Intensity line plots in Con MCF10DCIS.com cells
Location (um)	TRPV4	DiI	DAPI
0	7	19	74
0.267	19.207	17.931	71.759
0.534	7.276	16.1379	65.241
0.801	12.966	18.4138	56.448
1.068	9.828	36.8276	47.103
1.335	151.379	89.7586	40.034
1.602	255	134	36.655
1.869	160.483	109.483	36.931
2.136	52.276	67.8966	38.552
2.403	34	43.7586	38
2.67	60.414	43.3793	38.31
2.937	103.345	57.6552	39
3.204	66.414	52.5862	43.828
3.471	27.103	46.4483	46.793
3.738	0	42.5517	50.897
4.005	1.517	39.5172	64.172
4.272	3.517	31.9655	88.517
4.539	0	26.6552	115.517
4.806	14.552	24.5172	137
5.073	33.31	20	150.379
5.34	2.655	18.3793	157.862
5.607	0	18.5517	167.759
5.874	8.793	17	175.483
6.141	39.862	16	178.517
6.408	51.69	16	176.207
6.675	32.276	16	174.862
6.942	15.103	16	173.517
7.209	27.448	16	177.034
7.476	7.828	17	179.931
7.743	2	17	184
8.01	14.345	17	180
8.277	27.345	17	180.552
8.544	5.517	17	181.034
8.811	4.759	17	184
9.078	4.138	17	180.31
9.345	14.069	17	180
9.612	10.621	17	179.448
9.879	2.207	16.4483	173.552
10.146	1.517	16.3793	165.759
10.413	18.034	16	151.931
10.68	26.103	21.2759	136.483
10.947	55.31	23.4828	117.172
11.214	22.31	23.8966	97.103
11.481	51.345	29.8621	78.069
11.748	67.931	30.2759	60.069
12.015	25.552	46.7931	46.517
12.282	124.207	59.069	36.69
12.549	143.069	45.4483	27.483
12.816	195.414	61.1034	18.31
13.083	255	64	15.379
13.35	187.345	38.069	15.897
13.617	58.069	17.4483	15.517
13.884	25.241	17	13.586
14.151	5.448	17	11.655
14.418	14.828	17	11.724
14.685	3.172	17	13
14.952	25.552	16	13.276
15.219	11.655	16.931	11.207
15.486	19	16	11
