# Supplementary material for: Cell crowding activates pro-invasive mechanotransduction pathway in high-grade DCIS via TRPV4 inhibition and cell volume reduction
Source: eLife. 2025 Apr 21;13:RP100490. doi: 10.7554/eLife.100490 (PMC12011371; doi:10.7554/eLife.100490)
Supplement: Figure 4—figure supplement 1—source data 2. [file elife-100490-fig4-figsupp1-data2.xlsx]

## Sheet: Sheet1
Numerical data for Figure 4 - figure supplement 1B - for Fluo-4 intensity line plots in ND MCF10DCIS.com cells
	1		2
Location (um)	Fluo-4 intensity	Location (um)	Fluo-4 intensity
0	30	0	0
0.267	15.626	0.267	230
0.534	8.82	0.534	257.017
0.801	13.872	0.801	301.491
1.068	13.858	1.068	382.536
1.335	21.723	1.335	144.719
1.602	18.82	1.602	334.351
1.869	20.474	1.869	188.967
2.136	21.159	2.136	244.531
2.403	84.529	2.403	206.233
2.67	226.349	2.67	200.675
2.937	435.848	2.937	127.372
3.204	605.031	3.204	222.259
3.471	677.848	3.471	413.265
3.738	684.471	3.738	164.382
4.005	641.443	4.005	109.448
4.272	438.668	4.272	206.606
4.539	255	4.539	110.36
4.806	149.913	4.806	338.349
5.073	116.509	5.073	162.77
5.34	114.384	5.34	81.166
5.607	130.529	5.607	184.388
5.874	151.799	5.874	276.29
6.141	179.332	6.141	309.9
6.408	205.934	6.408	674.235
6.675	223.457	6.675	498.666
6.942	220.765	6.942	210.657
7.209	210.315	7.209	94.607
7.476	205.799	7.476	53.557
7.743	205.256	7.743	9.739
8.01	186.277	8.01	49.718
8.277	179.533	8.277	31.674
8.544	166.734	8.544	-12.911
8.811	165.868	8.811	63.005
9.078	182	9.078	55.425
9.345	220.744	9.345	6.534
9.612	219.218	9.612	23.89
9.879	221.695	9.879	30.002
10.146	209.941	10.146	17.933
10.413	191.038	10.413	10.018
10.68	174.692	10.68	48.625
10.947	162.374	10.947	65.749
11.214	173.156	11.214	24.39
11.481	185.045	11.481	4.362
11.748	183.073	11.748	29.692
12.015	163.882	12.015	94.55
12.282	134.903	12.282	16.529
12.549	114.097	12.549	21.892
12.816	110.09	12.816	56.713
13.083	123.536	13.083	59.964
13.35	113.367	13.35	27.016
13.617	101	13.617	57.811
13.884	161.74	13.884	33.103
14.151	181.941	14.151	66.491
14.418	160.18	14.418	259.378
14.685	175.197	14.685	500.687
14.952	193.868	14.952	443.079
15.219	187.889	15.219	505.484
15.486	161.574	15.486	617.508
15.753	178.225	15.753	532.603
16.02	173.651	16.02	313.555
16.287	184.176	16.287	225.958
16.554	180.9	16.554	75.758
16.821	168.581	16.821	184.11
17.088	165.128	17.088	237.777
17.355	152.965	17.355	128.685
17.622	139.197	17.622	116.337
17.889	147.882	17.889	52.308
18.156	134	18.156	144.299
		18.423	132.219
		18.69	139.241
		18.957	389.363
		19.224	92.55
		19.491	97.7
		19.758	165
