# Supplementary material for: Cell crowding activates pro-invasive mechanotransduction pathway in high-grade DCIS via TRPV4 inhibition and cell volume reduction
Source: eLife. 2025 Apr 21;13:RP100490. doi: 10.7554/eLife.100490 (PMC12011371; doi:10.7554/eLife.100490)
Supplement: Figure 4—figure supplement 2—source data 1. [file elife-100490-fig4-figsupp2-data1.xlsx]

## Sheet: Sheet1
Numerical data for Figure 4 - figure supplement 2A - for % live DCIS.com cells
DCIS density	GSK1 pM	live cell	dead cell	total cell	%live cells	average	stdev	DCIS density	GSK1 pM	live cell	dead cell	total cell	%live cells	average	stdev
ND	0	27	0	27	100			OC	0	38	1	39	97.4359
	0	28	1	29	96.5517				0	41	2	43	95.3488
	0	32	0	32	100				0	43	2	45	95.5556
	0	28	1	29	96.5517	98.2759	1.99086		0	38	3	41	92.6829	95.2558	1.95542
	0.05	26	0	26	100				0.05	38	1	39	97.4359
	0.05	22	2	24	91.6667				0.05	39	1	40	97.5
	0.05	26	1	27	96.2963				0.05	34	2	36	94.4444
	0.05	22	0	22	100	96.9907	3.95556		0.05	35	1	36	97.2222	96.6506	1.47558
	0.1	20	2	22	90.9091				0.1	37	2	39	94.8718
	0.1	22	1	23	95.6522				0.1	36	1	37	97.2973
	0.1	26	1	27	96.2963				0.1	34	2	36	94.4444
	0.1	28	2	30	93.3333	94.0477	2.44893		0.1	40	2	42	95.2381	95.4629	1.2652
	0.2	17	3	20	85				0.2	31	4	35	88.5714
	0.2	21	3	24	87.5				0.2	28	3	31	90.3226
	0.2	25	2	27	92.5926				0.2	41	2	43	95.3488
	0.2	24	2	26	92.3077	89.3501	3.72413		0.2	33	3	36	91.6667	91.4774	2.8753
	1	10	10	20	50				1	27	9	36	75
	1	3	2	5	60				1	29	6	35	82.8571
	1	6	6	12	50				1	33	8	41	80.4878
	1	6	7	13	46.1538	51.5385	5.92524		1	35	9	44	79.5455	79.4726	3.29116
DCIS density	GSK2 nM	live cell	dead cell	total cell	%live cells	average	stdev	DCIS density	GSK2 nM	live cell	dead cell	total cell	%live cells	average	stdev
ND	0	27	0	27	100			OC	0	38	1	39	97.4359
	0	28	1	29	96.5517				0	41	2	43	95.3488
	0	32	0	32	100				0	43	2	45	95.5556
	0	28	1	29	96.5517	98.2759	1.99086		0	38	3	41	92.6829	95.2558	1.95542
	0.1	24	1	25	96				0.1	35	2	37	94.5946
	0.1	28	2	30	93.3333				0.1	39	3	42	92.8571
	0.1	26	2	28	92.8571				0.1	36	2	38	94.7368
	0.1	24	1	25	96	94.5476	1.6883		0.1	36	3	39	92.3077	93.6241	1.22491
	0.2	18	1	19	94.7368				0.2	40	4	44	90.9091
	0.2	21	3	24	87.5				0.2	39	3	42	92.8571
	0.2	24	2	26	92.3077				0.2	41	5	46	89.1304
	0.2	26	2	28	92.8571	91.8504	3.08113		0.2	40	3	43	93.0233	91.48	1.83708
	1	21	2	23	91.3043				1	31	6	35	88.5714
	1	26	2	28	92.8571				1	28	6	31	90.3226
	1	17	3	20	85				1	31	7	36	86.1111
	1	17	3	20	85	88.5404	4.13693		1	33	5	36	91.6667	89.1679	2.39978
	3	15	3	18	83.3333				3	27	9	36	75
	3	11	3	14	78.5714				3	29	11	40	72.5
	3	9	4	13	69.2308				3	33	8	41	80.4878
	3	10	4	14	71.4286	75.641	6.49602		3	35	9	44	79.5455	76.8833	3.77887
