# Supplementary material for: Cell crowding activates pro-invasive mechanotransduction pathway in high-grade DCIS via TRPV4 inhibition and cell volume reduction
Source: eLife. 2025 Apr 21;13:RP100490. doi: 10.7554/eLife.100490 (PMC12011371; doi:10.7554/eLife.100490)
Supplement: Figure 4—figure supplement 3—source data 1. [file elife-100490-fig4-figsupp3-data1.xlsx]

## Sheet: Sheet1
Numerical data for Figure 4 - figure supplement 3A - for the temporal Fluo-4 intensity value in ND MCF10DCIS.com cells
time (s)	Fluo-4 (74.4 mOsmol/Kg added at 180 s)
0	711.334
30	709.705
60	700.57
90	702.115
120	713.357
150	707.387
180	700.318
210	838.533
240	953.95
270	1083.32
300	1239.58
330	1356.5
360	1403.04
390	1422.15
420	1431.63
450	1409.91
480	1357.68
510	1336.87
540	1306.47
570	1276.55
600	1244.37
630	1216.29
660	1183
690	1169.24
720	1166.56
750	1146.91
780	1148.7
810	1135.82
840	1111.84
870	1124.46
900	1116.47
930	1108.63
960	1079.94
990	1075.47
1020	1074.56
1050	1079.22
1080	1062.4
1110	1056.46
1140	1053.84
1170	1064.72
1200	1064.32
1230	1090.93
1260	1091.62
1290	1091.7
1320	1099.38
1350	1078.1
1380	1104.19
1410	1093.97
1440	1111.37
1470	1108.18
1500	1109.43
1530	1106.87
1560	1114.02
1590	1122.4
1620	1111.23
1650	1112.98
1680	1108.88
1710	1110.03
1740	1114.41
1770	1107.92
1800	1112.55
1830	1101.17
