# Supplementary material for: Cell crowding activates pro-invasive mechanotransduction pathway in high-grade DCIS via TRPV4 inhibition and cell volume reduction
Source: eLife. 2025 Apr 21;13:RP100490. doi: 10.7554/eLife.100490 (PMC12011371; doi:10.7554/eLife.100490)
Supplement: Figure 4—figure supplement 3—source data 2. [file elife-100490-fig4-figsupp3-data2.xlsx]

## Sheet: Sheet1
Numerical data for Figure 4 - figure supplement 3B - for % PM KCNN4 and PIEZO1 in DCIS.com cells
	KCNN4			#NAME?	PIEZO1
Control	0.3 Osm/L PEG 300	OC		Control	0.3 Osm/L PEG 300	OC
0.270081	18.6833	18.3618		13.3631	32.5988	62.7881
4.94666	22.6972	20.9262		27.0424	45.2155	67.1892
1.46116	17.5844	17.0169		21.5792	44.6474	65.9406
3.98052	22.5221	19.2343		36.5631	43.2552	64.0539
0.836556	21.1972	12.8833		21.777	38.4255	89.4878
1.85756	27.829	17.7204		25.0964	28.4956	64.8353
6.6149	26.5326	13.1672		35.8836	38.8161	53.4088
4.91891	27.2219	16.072		29.1046	32.5803	44.2722
3.2396	22.6826	12.4583		40.0165	38.6799	74.9511
2.13841	25.5163	16.2249		22.3589	34.6924	74.7354
5.04774	28.5523	14.1705		45.9256	34.9532
1.31376	22.8422	13.6638		23.7838
2.2981		11.0762		42.7538
6.81753		6.59412		29.3705
17.1		16.4129		35.9923
8.25023				41.263
4.74282				19.3093
9.13514				13.8285
17.1				26.0204
8.25023				6.40897
23.4418				4.70882
4.74282
9.13514
22.8845
17.4121
20.6337
11.0199
18.4979
11.2304
14.5211
19.7414
11.1589
27.0832
4.68711
2.65339
4.30336
3.12407
4.03297
