# Supplementary material for: Cell crowding activates pro-invasive mechanotransduction pathway in high-grade DCIS via TRPV4 inhibition and cell volume reduction
Source: eLife. 2025 Apr 21;13:RP100490. doi: 10.7554/eLife.100490 (PMC12011371; doi:10.7554/eLife.100490)
Supplement: Figure 4—source data 1. [file elife-100490-fig4-data1.xlsx]

## Sheet: Sheet1
Numerical data for Figure 4B - for the temporal Fluo-4 intensity values in ND vs Con MCF10DCIS.com cells
time (s)	ND	Con
0	1117.53	1050.27
30	1145.37	1104.22
60	1150.56	1096.82
90	1145.04	1101.19
120	1134.52	1101.56
150	1160.41	1130.72
180	1144.25	1121.23
210	1147.22	1105.21
240	1143.35	1110.78
270	1156.55	1090.46
300	1150.93	1108.64
330	1454.71	1081.09
360	1468.56	1045.36
390	1461.09	1068.07
420	1473.42	1061.42
450	1482.26	1074.25
480	1460.61	1075.36
510	1436.65	1080.66
540	1463.08	1070.59
570	1449.58	1086.83
600	1460.7	1065.13
630	1457.02	1087.44
660	1495.07	1072.25
690	1473.64	1085.93
720	1456.46	1093.27
750	1466.58	1084.3
780	1471.88	1098.73
810	1485.48	1073.24
840	1459.36	1083.89
870	1472.65	1085.47
900	1475.39	1093.72
930	1502.9	1091.15
960	1469.23	1093.92
990	1496.28	1079.68
1020	1468.1	1097.06
1050	1478.47	1092.69
1080	1487.52	1094.89
1110	1487.89	1079.73
1140	1470.22	1100.18
1170	1462.69	1079.3
1200	1471.98	1101.83
1230	1477.02	1096.78
1260	1477.59	1109.69
1290	1465.77	1101.44
1320	1456.91	1101.52
1350	1474.53	1093.09
1380	1476.24	1096.21
1410	1447.59	1107.44
1440	1458.71	1084.81
1470	1476.4	1090.27
1500	1461.78	1099.45
