# Supplementary material for: Cell crowding activates pro-invasive mechanotransduction pathway in high-grade DCIS via TRPV4 inhibition and cell volume reduction
Source: eLife. 2025 Apr 21;13:RP100490. doi: 10.7554/eLife.100490 (PMC12011371; doi:10.7554/eLife.100490)
Supplement: Figure 4—source data 2. [file elife-100490-fig4-data2.xlsx]

## Sheet: Sheet1
Numerical data for Figure 4C - for average Fluo-4 intensity values between ND and Con MCF10DCIS.com cells
ND	Con
760	489
842	340
609	438
910	403
1200	403
1350	340
1646	134
1034	216
1116	203
1004	360
