# Supplementary material for: Cell crowding activates pro-invasive mechanotransduction pathway in high-grade DCIS via TRPV4 inhibition and cell volume reduction
Source: eLife. 2025 Apr 21;13:RP100490. doi: 10.7554/eLife.100490 (PMC12011371; doi:10.7554/eLife.100490)
Supplement: Figure 4—source data 3. [file elife-100490-fig4-data3.xlsx]

## Sheet: Sheet1
Numerical data for Figure 4E - for temporal Fluo-4 intensity values with GSK219 added in the middle in ND MCF10DCIS.com cells
ND	Con
760	489
842	340
609	438
910	403
1200	403
1350	340
1646	134
1034	216
1116	203
1004	360
