# Supplementary material for: Cell crowding activates pro-invasive mechanotransduction pathway in high-grade DCIS via TRPV4 inhibition and cell volume reduction
Source: eLife. 2025 Apr 21;13:RP100490. doi: 10.7554/eLife.100490 (PMC12011371; doi:10.7554/eLife.100490)
Supplement: Figure 4—source data 4. [file elife-100490-fig4-data4.xlsx]

## Sheet: Sheet1
Numerical data for Figure 4G - for temporal Fluo-4 intensity values with GSK219 added in the middle in Con MCF10DCIS.com cells
time (s)	GSK219 added to Con DCIS.com
0	270.207
30	266.103
60	260.485
90	273.923
120	284.169
150	271.224
180	273.466
210	265.865
240	273.534
270	272.395
300	275.997
330	275.843
360	274.435
390	268.27
420	242.759
450	271.925
480	260.407
510	267.11
540	262.931
570	271.952
600	266.981
630	261.521
660	264.128
690	261.916
720	274.996
750	264.318
780	267.895
810	272.471
840	258.266
870	264.396
900	266.784
930	264.177
960	266.522
990	261.813
1020	263.326
1050	265.602
1080	266.574
1110	257.62
1140	264.982
1170	263.39
1200	263.656
1230	263.697
1260	266.621
1290	267.566
1320	259.3
1350	267.792
1380	266.641
1410	263.918
1440	260.291
1470	269.209
1500	973.929
1530	984.749
1560	975.772
1590	992.976
1620	980.667
1650	994.148
1680	988.135
1710	976.413
1740	979.7
1770	989.159
1800	993.328
1830	968.873
1860	973.363
1890	980.33
1920	992.49
1950	1002.69
1980	1006.1
2010	984.803
2040	985.124
2070	999.128
