# Supplementary material for: Cell crowding activates pro-invasive mechanotransduction pathway in high-grade DCIS via TRPV4 inhibition and cell volume reduction
Source: eLife. 2025 Apr 21;13:RP100490. doi: 10.7554/eLife.100490 (PMC12011371; doi:10.7554/eLife.100490)
Supplement: Figure 4—source data 5. [file elife-100490-fig4-data5.xlsx]

## Sheet: Sheet1
Numerical data for Figure 4H - for Del Ca value comparison between ND and Con MCF10DCIS.com cells
ND-gsk219L	ND-gsk219H	C-gsk219L	C-gsk219H
-9	-70	-14	-50
-12	-80	-8	-50
-20	-50	-7	-30
-9	-40	-7	-30
-13	-40	-4	-30
-8	-50	-3	-45
-11	-90	-6	-45
-30	-60		-31
-29	-75		-25
	-55		-25
	-65		-30
	-120		-25
			-35
			-30
