# Supplementary material for: Cell crowding activates pro-invasive mechanotransduction pathway in high-grade DCIS via TRPV4 inhibition and cell volume reduction
Source: eLife. 2025 Apr 21;13:RP100490. doi: 10.7554/eLife.100490 (PMC12011371; doi:10.7554/eLife.100490)
Supplement: Figure 4—source data 6. [file elife-100490-fig4-data6.xlsx]

## Sheet: Sheet1
Numerical data for Figure 4J - for temporal Fluo-4 intensity values with GSK101 added in the middle in ND MCF10DCIS.com cells
time (s)	GSK101 added to ND DCIS.com cells
0	1107.9
30	1084.77
60	1067.11
90	1094.03
120	1097.52
150	1097.07
180	1105.32
210	1099.51
240	1107.9
270	1084.77
300	1120.37
330	1125.37
360	1126.5
390	1304.17
420	1264.51
450	1170.26
480	1108.81
510	1095.67
540	1086.09
570	1073.86
600	1075.96
630	1091.46
660	1079.81
690	1067.41
720	1071.81
750	1074.48
780	1069.05
810	1065.87
840	1074.64
870	1080.54
900	1068.97
930	1067.66
960	1041.47
990	1070.18
1020	1067.41
1050	1074.05
1080	1068.1
1110	1069.59
1140	1072.02
1170	1065.64
1200	1056.04
1230	1081.54
1260	1075.37
1290	1070.98
1320	1071.42
1350	1075.27
1380	1089.26
1410	1078
1440	1097.06
1470	1078.45
1500	1078.28
1530	1075.25
1560	1080.57
1590	1074.46
1620	1075.61
1650	1079.8
1680	1076.14
1710	1079.32
1740	1068.62
1770	1084.57
1800	1078.26
1830	1082.54
1860	1092.2
1890	1066.39
1920	1086.52
1950	1071.33
1980	1079.17
2010	1079.54
2040	1080.36
2070	1086.33
2100	1091.56
2130	1077
