# Supplementary material for: Cell crowding activates pro-invasive mechanotransduction pathway in high-grade DCIS via TRPV4 inhibition and cell volume reduction
Source: eLife. 2025 Apr 21;13:RP100490. doi: 10.7554/eLife.100490 (PMC12011371; doi:10.7554/eLife.100490)
Supplement: Figure 4—source data 7. [file elife-100490-fig4-data7.xlsx]

## Sheet: Sheet1
Numerical data for Figure 4L - for temporal Fluo-4 intensity values with GSK101 added in the middle in Con MCF10DCIS.com cells
time (s)	GSK101 added to Con DCIS.com cells
0	367.408
30	415.104
60	416.061
90	408.652
120	424.816
150	424.627
180	416.839
210	409.236
240	417.684
270	414.5
300	431.601
330	3003.36
360	2053.04
390	1178.01
420	798.998
450	604.171
480	524.856
510	474.993
540	465.603
570	458.304
600	438.548
630	431.352
660	437.548
690	427.533
720	443.583
750	455.787
780	438.932
810	454.719
840	453.381
870	430.198
900	442.255
930	441.75
960	434.296
990	452.383
1020	446.878
1050	447.47
1080	448.101
1110	448.112
1140	439.5
1170	428.895
1200	444.06
1230	427.869
1260	423.181
1290	430.613
1320	421.532
1350	407.564
1380	417.602
1410	426.93
1440	417.588
1470	422.014
1500	416.157
1530	425.563
1560	402.375
1590	420.725
1620	410.504
1650	418.55
1680	425.484
1710	419.524
1740	425.654
1770	420.887
1800	418.54
1830	426.13
1860	415.712
1890	415.707
1920	423.502
1950	416.829
1980	430.039
2010	403.54
2040	414.62
2070	423.969
2100	1091.56
2130	1077
