# Supplementary material for: Cell crowding activates pro-invasive mechanotransduction pathway in high-grade DCIS via TRPV4 inhibition and cell volume reduction
Source: eLife. 2025 Apr 21;13:RP100490. doi: 10.7554/eLife.100490 (PMC12011371; doi:10.7554/eLife.100490)
Supplement: Figure 4—source data 8. [file elife-100490-fig4-data8.xlsx]

## Sheet: Sheet1
Numerical data for Figure 4M - for Del Ca value comparison between ND and Con MCF10DCIS.com cells
ND-gsk101L	ND-gsk101H	C-GSK101L	C-gsk101H
34	400	200	2600
30	200	110	2900
46	500	130	2800
31	320	103	1540
34	200	230	900
42	250	160	1900
33	400	160	2000
	330	180	1800
	280	280	1500
