# Supplementary material for: Cell crowding activates pro-invasive mechanotransduction pathway in high-grade DCIS via TRPV4 inhibition and cell volume reduction
Source: eLife. 2025 Apr 21;13:RP100490. doi: 10.7554/eLife.100490 (PMC12011371; doi:10.7554/eLife.100490)
Supplement: Figure 4—source data 9. [file elife-100490-fig4-data9.xlsx]

## Sheet: Sheet1
Numerical data for Figure 4P - for %PM TRPV4 in ND DCIS.com cells
ctrl	GSK101 L	GSK101H	GSK219L	GSK219H	PEG300
11.7773	18.9911	17.5896	48.8706	62.5	47.3054
17.4217	20.7831	13.5385	43.4243	58.1967	50.8452
12.9954	19.6262	16.5803	50.2273	55.132	64.9314
20.7674	11.2211	6.07143	50.1188	55.2795	61.8304
19.5607	15.9292	10.2804	56.6667	63.2479	56.6322
18.2041	17.5637	5.76271	62.963	73.4767	61.3369
21.7825			60.2837	68.5185	59.749
4.74158					54.4246
8.04364					54.5117
7.0182					60.7866
14.0788					67.5017
7.6187					73.9273
