# Supplementary material for: Cell crowding activates pro-invasive mechanotransduction pathway in high-grade DCIS via TRPV4 inhibition and cell volume reduction
Source: eLife. 2025 Apr 21;13:RP100490. doi: 10.7554/eLife.100490 (PMC12011371; doi:10.7554/eLife.100490)
Supplement: Figure 4—source data 10. [file elife-100490-fig4-data10.xlsx]

## Sheet: Sheet1
Numerical data for Figure 4Q - for %PM TRPV4 in OC DCIS.com cells
ctrl	GSK101 L	GSK101H	GSK219L	GSK219H	PEG300
89.2111	53.2192	49.8691	51.9097	60.5378	47.3054
67.495	46.8184	41.7855	72.5688	66.2506	50.8452
91.4611	58.6922	37.9703	70.7958	57.6592	64.9314
65.9143	43.1204	48.5367	68.4331	68.3133	61.8304
62.5835	48.5944	45.9293	55.1551	63.2603	56.6322
72.7446	46.259	58.0409	57.9626	58.9326	61.3369
78.4624	69.3908	51.8657	54.0685	66.1359	59.749
76.9254		52.9212	60.3426	62.9905	54.4246
		45.7017		71	54.5117
		49.0107		66	60.7866
		41.8215			67.5017
		41.3407			73.9273
		54.0952
