# Supplementary material for: Cell crowding activates pro-invasive mechanotransduction pathway in high-grade DCIS via TRPV4 inhibition and cell volume reduction
Source: eLife. 2025 Apr 21;13:RP100490. doi: 10.7554/eLife.100490 (PMC12011371; doi:10.7554/eLife.100490)
Supplement: Figure 4—source data 11. [file elife-100490-fig4-data11.xlsx]

## Sheet: Sheet1
Numerical data for Figure 4R - for correlating Del Ca with % PM TRPV4
	-Ca	pmTRPV4
Con	-350	83
ND-219H	-70	62
ND-219L	-16	53
ND	0	13.6
ND-101L	36	17
ND-101H	320	11
