# Supplementary material for: Cell crowding activates pro-invasive mechanotransduction pathway in high-grade DCIS via TRPV4 inhibition and cell volume reduction
Source: eLife. 2025 Apr 21;13:RP100490. doi: 10.7554/eLife.100490 (PMC12011371; doi:10.7554/eLife.100490)
Supplement: Figure 4—source data 12. [file elife-100490-fig4-data12.xlsx]

## Sheet: Sheet1
Numerical data for Figure 4T - for Fluo-4 time traces with PEG added in ND versus Con MCF10DCIS.com cells
t (s)	ND + PEG	Con
0	900.114	237.952
30	941.306	244.346
60	943.726	237.346
90	940.579	240.906
120	944.575	239.923
150	958.962	239.452
180	956.159	237.499
210	962.335	243.193
240	959.176	240.689
270	967.68	241.87
300	972.301	244.872
330	1669.56	244.451
360	1881.43	238.989
390	1963.73	239.144
420	2027.13	232.571
450	2092.45	230.598
480	2108.78	239.457
510	2130.33	236.848
540	2112	236.989
570	2038.95	233.147
600	1998.88	240.458
630	1922.74	237.951
660	1835.13	241.435
690	1784.33	244.462
720	1735.37	244.458
750	1667.45	245.78
780	1616.07	241.963
810	1581.11	242.079
840	1533.81	244.666
870	1517.88	247.47
900	1456.77	248.45
930	1431.59	244.306
960	1409.79	247.345
990	1398.03	247.433
1020	1387.12	249.577
1050	1354.67	248.723
1080	1326.27	245.791
1110	1295.99	245.372
1140	1307.32	245.292
1170	1292.39	248.635
1200	1256.8	248.742
1230	1277.21	255.671
1260	1241.08	254.308
1290	1228.36	252.105
1320	1220.12	250.957
1350	1212.47	252.66
1380	1211.8	255.048
1410	1216.75	250.455
1440	1214.31	254.677
1470	1201.36	252.537
1500	1197.24	254.264
1530	1174.58	252.033
1560	1181.32	258.997
1590	1170.3	257.201
1620	1166.45	257.618
1650	1157.64	263.201
1680	1155.93	252.03
1710	1140.61	260.875
1740	1143.71	263.425
1770	1128.96	262.098
1800	1134.83	261.848
1830	1135.69	263.928
1860	1132.11	260.974
1890	1117.04	262.735
1920	1079.38	262.917
1950	1091.01	264.109
1980	1060.56	265.595
2010	1060.56	258.613
2040	1044.65	268.325
2070	1032.73	263.346
