# Supplementary material for: Cell crowding activates pro-invasive mechanotransduction pathway in high-grade DCIS via TRPV4 inhibition and cell volume reduction
Source: eLife. 2025 Apr 21;13:RP100490. doi: 10.7554/eLife.100490 (PMC12011371; doi:10.7554/eLife.100490)
Supplement: Figure 4—source data 13. [file elife-100490-fig4-data13.xlsx]

## Sheet: Sheet1
Numerical data for Figure 4V - for Fluo-4 time traces with PEG added in shRNA+ND versus shRNA+Con MCF10DCIS.com cells
time (s)	PEG + shRNA-ND DCIS.com	shRNA-Con
0	560.186	387.568
30	564.511	399.317
60	567.537	395.859
90	580.777	403.92
120	595.126	403.359
150	569.957	397.177
180	565.489	397.594
210	571.003	405.089
240	561.58	405.833
270	590.969	404.515
300	572.14	404.134
330	600.314	424.182
360	650.891	419.144
390	677.163	416.321
420	696.76	418.173
450	705.049	413.077
480	703.203	415.674
510	686.874	422.899
540	692.677	417.881
570	680.583	419.131
600	651.814	419.485
630	645.154	423.147
660	603.414	421.284
690	572.806	418.312
720	554.197	435.377
750	520.523	429.222
780	487.063	432.957
810	498.246	432.369
840	483.631	437.42
870	464.331	439.498
900	476.863	433.155
930	465.354	434.025
960	478.843	437.235
990	481.446	434.253
1020	479.24	435.936
1050	479.569	442.732
1080	475.646	433.381
1110	461.183	434.149
1140	467.434	441.046
1170	458.606	445.262
1200	461.006	442.705
1230	463.714	448.495
1260	451.071	443.932
1290	462.494	449.238
1320	468.914	453.597
1350	464.669	444.787
1380	464.834	448.756
1410	472.423	450.125
1440	459.351	447.182
1470	464.403	439.266
1500	458.869	453.266
1530	460.614	448.123
1560	479.1	448.63
1590	475.489	457.938
1620	468.714	458.588
1650	473.094	460.295
1680	477.44	454.045
1710	470.537	450.708
1740	469.386	462
1770	470.251	461.696
1800	480.874	470.698
1830	473.563	470.702
1860	470.306	462.644
1890	476.966	473.705
1920	465.131	467.616
1950	484.949	463.96
1980	482.649	459.174
2010	470.126	475.354
