# Supplementary material for: Cell crowding activates pro-invasive mechanotransduction pathway in high-grade DCIS via TRPV4 inhibition and cell volume reduction
Source: eLife. 2025 Apr 21;13:RP100490. doi: 10.7554/eLife.100490 (PMC12011371; doi:10.7554/eLife.100490)
Supplement: Figure 4—source data 14. [file elife-100490-fig4-data14.xlsx]

## Sheet: Sheet1
Numerical data for Figure 4W - for comparing average Fluo-4 values between ND and Con, without or with shRNA TRPV4 treatment
ctrlNDDCIS	conDCIS	shNDDCIS	conshDCIS
1023	500	660	490
761	310	730	640
964	240	750	540
1164	310	540	520
700	290	500	590
550	290	760	620
959	370	650	480
1134	310	670	250
691	489	930	460
760	340	630	730
842	438	730	470
609	403		480
910	403		250
1200	340		450
1350	134		400
1646	216		450
1034	203
1116	360
1004
