# Supplementary material for: Cell crowding activates pro-invasive mechanotransduction pathway in high-grade DCIS via TRPV4 inhibition and cell volume reduction
Source: eLife. 2025 Apr 21;13:RP100490. doi: 10.7554/eLife.100490 (PMC12011371; doi:10.7554/eLife.100490)
Supplement: Figure 4—source data 15. [file elife-100490-fig4-data15.xlsx]

## Sheet: Sheet1
Numerical data for Figure 4X - for Del Ca value comparison between ctrl and shTRPV4 treated ND MCF10DCIS.com cells
CA-PEGNDDCIS (difference)	CA-PEGshNDDCIS (different)
1700	650
2200	718
1200	600
2200	400
1300	490
1400	320
2100	290
1400	610
1100	370
1530	370
1000	200
750	530
670	210
650	280
720	282
580	285
620
380
600
