# Supplementary material for: Cell crowding activates pro-invasive mechanotransduction pathway in high-grade DCIS via TRPV4 inhibition and cell volume reduction
Source: eLife. 2025 Apr 21;13:RP100490. doi: 10.7554/eLife.100490 (PMC12011371; doi:10.7554/eLife.100490)
Supplement: Figure 4—source data 16. [file elife-100490-fig4-data16.xlsx]

## Sheet: Sheet1
Numerical data for Figure 4Y - for comparing cell volume between ND and ND + PEG, without or with shRNA TRPV4 treatment
dcisND	dicsND-PEG	dcis ND-shRNA	dcisND-shRNA-PEG
7464	6768	8880	4810
13000	7582	10700	9733
8364	3471	7869	9483
11200	3897	10400	8599
9852	3950	10900	8124
10700	3549	9397	6742
7857	4631	10200	4857
8501	6629	10600	7472
10700	4472		9491
11800	8240		4328
9211	6117		5429
	4662
	3934
