# Supplementary material for: Cell crowding activates pro-invasive mechanotransduction pathway in high-grade DCIS via TRPV4 inhibition and cell volume reduction
Source: eLife. 2025 Apr 21;13:RP100490. doi: 10.7554/eLife.100490 (PMC12011371; doi:10.7554/eLife.100490)
Supplement: Figure 5—source data 1. [file elife-100490-fig5-data1.xlsx]

## Sheet: Sheet1
Numerical data for Figure 5A - for cell volume values in ND DCIS.com cells
ctrl	GSK1L	GSK1H	GSK2L	GSK2H	PEG
8382	7488	6515	5786	2351	2846
3808	3989	11840	4401	2617	4250
3568	3855	11840	4726	2650	3120
4432	4175	3553	5614	4079	5060
6979	3497	3210	3522	4742	3493
1908	10840	6303	7041	7676	5140
4935	6408	5136	3590	6245	4619
4036	6559	5954	7022	4918	4718
4937	4715	5056	6315	4774	4032
2677	5276		6809	3222	5410
3425	3442			3240	3629
2299	6774			2416	3381
2959	12400			3679	4438
3293	5865			3224	4750
3915	7616			3211	3610
7480	4185				4432
7280	6179				4901
6029	5658				5160
4720.41	7498				4110
6783.91					3307
9976.4					5236
9569.85					2131
4003.97					3562
6443.72
7549.47
7970.95
8501.73
8740.4
7434.59
5598
3964.55
9616
9850
