# Supplementary material for: Cell crowding activates pro-invasive mechanotransduction pathway in high-grade DCIS via TRPV4 inhibition and cell volume reduction
Source: eLife. 2025 Apr 21;13:RP100490. doi: 10.7554/eLife.100490 (PMC12011371; doi:10.7554/eLife.100490)
Supplement: Figure 5—source data 2. [file elife-100490-fig5-data2.xlsx]

## Sheet: Sheet1
Numerical data for Figure 5B - for cell volume values in OC DCIS.com cells
ctrl	GSK1L	GSK1H	GSK2L	GSK2H	PEG
2236	2400	3374	1452	2542	1970
1104	2491	3143	1591	2398	2678
1623	3527	3725	1788	2512	1456
3260	2754	4694	1960	1691	2144
2592	2332	3109	1979	1395	1897
2242	2790	2101	2320	1469	1769
2790	2238	4657	2502	1509	1476
3572	2457	4013	3963	1894	1468
3633	2614	2693	1787	1962
1602	1789	2603	2555
2974	2939	3177	1380
1421	4092	4200	3024
3334	4079	3564	1758
4243	4246	4587	2116
1977	4179	4827	1657
2533		4076	1402
2663		4850	1781
2614		4381	2531
2024		3418	2907
3311.7		3553	3151
2467.17		2804	2762
2732.36		2306	2552
1554.85			2285
4774.02			1347
1097.28			1259
2027.91			2573
3071.62			1449
1366.82			1556
4413.55			3297
3540.37			2802
3027.35			2530
2310.27			2039
1794.06			2992
1861.78			2797
2795			2874
3628			2311
1296
2342
2856
1194
797
1335
1565
