# Supplementary material for: Cell crowding activates pro-invasive mechanotransduction pathway in high-grade DCIS via TRPV4 inhibition and cell volume reduction
Source: eLife. 2025 Apr 21;13:RP100490. doi: 10.7554/eLife.100490 (PMC12011371; doi:10.7554/eLife.100490)
Supplement: Figure 5—source data 3. [file elife-100490-fig5-data3.xlsx]

## Sheet: Sheet1
Numerical data for Figure 5C - for correlating between % PM TRPV4 and cell volume
	% PM TRPV4	Cell volume
DCIS ND	14	4575
DCIS ND GSK1 0.05 pM	17	6753
DCIS ND GSK1 0.2 pM	11	6601
DCIS ND GSK2 0.2 nM	53	5483
DCIS ND GSK2 1nM	62	3471
ND PEG 2%	59	4033
DCIS OC	83	2181
DCIS OC GSK1 0.05 pM	52	2995
DCIS OC GSK1 0.05 pM	47	3630
DCIS OC GSK2 0.2 nM	49	2251
DCIS OC GSK2 1nM	51	1930
PEG 2%	82	1857
