# Supplementary material for: Cell crowding activates pro-invasive mechanotransduction pathway in high-grade DCIS via TRPV4 inhibition and cell volume reduction
Source: eLife. 2025 Apr 21;13:RP100490. doi: 10.7554/eLife.100490 (PMC12011371; doi:10.7554/eLife.100490)
Supplement: Figure 5—source data 4. [file elife-100490-fig5-data4.xlsx]

## Sheet: Sheet1
Numerical data for Figure 5D - for invasive cell fractions in ND DCIS.com cells
ctrl	GSK1L	GSK1H	GSK2L	GSK2H	PEG
37.17	17.2695	10.9736	22.8297	25.8768	59.81
32.33	14.8841	14.7475	21.2212	29.4352	58.49
34.69	15.8787	8.92039	21.7806	27.7961	58.04
27.35	15.364	10.3693	23.4868	29.6133	60.79
33	32.41	28.12	41.32	50.76	49.59
27.71	29.9	27.69	41.3	58.43	49.12
33.02	30.52	25.22	38.58	56.73	52.98
32.57	28.53	28.3	38.11	58.29	55.45
39.56	26.63	25.29	43.72	56.94	56.01
36.46	27.64	25.31	45.69	54.2	55.5
32.66	32.34	21.34	39.52	59.75	53.55
38.5	30.66	24.05	45.71	70.94	52.6
40.47	35.45	19.04	52.3	57.75	66.22
39.75	33.25	28.91	46.42	67.64	56.82
31.6	33.63	28.38	51.6	71.62	65.77
36.26	31.68	24.63	59.83	71.92	58.63
18.53	30.97	21.08	64.68	67.95	63.12
20.79	36.12	26.89	63.64	70.9	51.47
17.01	32.53	23.31	60.85	65.44	58.94
17.98	33.93	21.82	53.41		56.37
23.46
