# Supplementary material for: Cell crowding activates pro-invasive mechanotransduction pathway in high-grade DCIS via TRPV4 inhibition and cell volume reduction
Source: eLife. 2025 Apr 21;13:RP100490. doi: 10.7554/eLife.100490 (PMC12011371; doi:10.7554/eLife.100490)
Supplement: Figure 5—source data 5. [file elife-100490-fig5-data5.xlsx]

## Sheet: Sheet1
Numerical data for Figure 5E - for invasive cell fractions in OC DCIS.com cells
ctrl	GSK1L	GSK1H	GSK2L	GSK2H	PEG
61.21	67.84	36.42	67.62	75.33	78.7
65.63	65.23	47.44	65.49	81.59	90.84
67.59	63.37	39.71	62.16	70.61	83.03
72.81	56.06	36.07	68.53	80.2	76.04
64.01	63.36	42.19	77.84	81.53	74.14
73.97	61.96	51.07	72.52	82.35	85.55
71.21	70.23	50.12	74.2	88.34	87.47
74.05	55.87	53.09	74.29	81.66	78.46
74.01	42.89	50	65.35	78.43	77.53
69.41	49.6	52.5	74.44	80.87	82.02
67.04	39.47	55.98	74.03	84.66	81.14
68.34	51.82	54.62	72.61	81.73	74.78
71.09	69.2	54.53	76.63	81.54	84.62
75.52	65.39	58.27	81.97	81.55	81.8
64.38	62.44	59.83	78.01	77.87	81.14
73.31	60.07	57.78	77.89	81.82	79.7
59.81	65.8	55.58	76.53	84.05	78.15
58.49	60.28	54.4	80.22	88.29	81.93
58.04	60.32	58.25	80.48	86.53	82.67
60.79	61.17	56.62	71.1	88.88	87.34
					80.08
					86.06
					88.67
