# Supplementary material for: Cell crowding activates pro-invasive mechanotransduction pathway in high-grade DCIS via TRPV4 inhibition and cell volume reduction
Source: eLife. 2025 Apr 21;13:RP100490. doi: 10.7554/eLife.100490 (PMC12011371; doi:10.7554/eLife.100490)
Supplement: Figure 5—source data 6. [file elife-100490-fig5-data6.xlsx]

## Sheet: Sheet1
Numerical data for Figure 5F - for correlating between % PM TRPV4 and invasive cell fraction
	% PM TRPV4	%Invasive cell fraction
DCIS ND	14	30.99
DCIS ND GSK1 0.05 pM	17	28.48
DCIS ND GSK1 0.2 pM	11	24.22
DCIS ND GSK2 0.2 nM	53	43.8
DCIS ND GSK2 1nM	62	55.37
ND PEG 2%	59	56.96
DCIS OC	83	67.54
DCIS OC GSK1 0.05 pM	52	59.62
DCIS OC GSK1 0.05 pM	47	51.22
DCIS OC GSK2 0.2 nM	49	72.31
DCIS OC GSK2 1nM	51	80.12
PEG 2%	82	81.82
