# Supplementary material for: Cell crowding activates pro-invasive mechanotransduction pathway in high-grade DCIS via TRPV4 inhibition and cell volume reduction
Source: eLife. 2025 Apr 21;13:RP100490. doi: 10.7554/eLife.100490 (PMC12011371; doi:10.7554/eLife.100490)
Supplement: Figure 5—source data 7. [file elife-100490-fig5-data7.xlsx]

## Sheet: Sheet1
Numerical data for Figure 5G - for correlating between cell volume and invasive cell fraction
	Cell volume	%Invasive cell fraction
DCIS ND	4575	30.99
DCIS ND GSK1 0.05 pM	6753	28.48
DCIS ND GSK1 0.2 pM	6601	24.22
DCIS ND GSK2 0.2 nM	5483	43.8
DCIS ND GSK2 1nM	3471	55.37
ND PEG 2%	4033	56.96
DCIS OC	2181	67.54
DCIS OC GSK1 0.05 pM	2995	59.62
DCIS OC GSK1 0.05 pM	3630	51.22
DCIS OC GSK2 0.2 nM	2251	72.31
DCIS OC GSK2 1nM	1930	80.12
PEG 2%	1857	81.82
