# Supplementary material for: Cell crowding activates pro-invasive mechanotransduction pathway in high-grade DCIS via TRPV4 inhibition and cell volume reduction
Source: eLife. 2025 Apr 21;13:RP100490. doi: 10.7554/eLife.100490 (PMC12011371; doi:10.7554/eLife.100490)
Supplement: Figure 5—source data 8. [file elife-100490-fig5-data8.xlsx]

## Sheet: Sheet1
Numerical data for Figure 5I - for cell diffusivity (um^2/s) of single ND DCIS.com cells
ctrl	GSK1L	GSK1H	GSK2L	GSK2H	PEG
0.01416	0	0.0129	0.05651	0.0107	0.007
0.0041	0.0012	0.0068	0.00969	0.01069	0.00595
0.000220573	0.001	0.0131	0.00783	0.00388	0.01285
0.00198	0.0012	0.0089	0.00422	0.01047	0.00688
0.00908	0.002	0.0002	0.00221	0.00474	0.0128
0.00469	0.0016	0.0037	0.01618	0.00141	0.00642
0.000351783	0	0.0099	0.02282	0.01249	0.01337
0.00294	0.0008	0.0195	0.01606	0.0083	0.0111
8.87887e-15	0	0.0106	0.0116	0.01073	0.002
0.00366	0.0013	0.0061	0.02244	0.00686	0.01181
0.00971	0.0008	0.0218	0.01604	0.00183	0.01342
0.000412349	0.0025	0.0133	0.00333	0.00794	0.0028
5.55114e-15	0.0011	0.0134	0.01972	0.02177	0.00695
0.00777	0.0053	0.0121	0.01167	0.007	0.01166
5.5513e-15	0.0013	0.0211	0.000420706	0.01205	0.0025
0.00786	0.0001	0.006	0.00368	0.000224159	0.01023
0.01687	0.0001	0.004	0.01121	0.00166	0.00551
0.01268	0.0011	0.0088	0.01292	0.01025	0.01254
0.00035593	0.0004	0.0109	0.01127	0.00627	0.00486
1.86354e-06	0	0.0088	0.01253	0.00303	0.01365
0.000250646	0.0029	0.0002	0.02038	0.00812	0.0084
0.000652472	0.0023	0.0055	0.05288	0.01161	0.01283
0.00149	0.0016	0.0205	0.0121	0.00923	0.00838
2.63947e-05	0.001	0.0011	0.02582	0.00697	0.00522
0.0111	0.0042	0.0066	0.000863085	0.00652	0.00904
0.000549536	0.0013	0.0143	0.01216	0.0071	0.01777
0.00334	0.0005	0.0012	0.00529	0.00723	0.00365
0.000999933	0.0001	0.0138	0.0121	0.01076	0.00385
0.00846	0.0095	0.0135	2.97777e-08	0.01552	0.01271
0.00059005	0.0011	0.0057	0.01059	0.00205	0.01036
5.55116e-15	0.0004	0.0133	0.00487	0.01132	0.00748
4.25073e-10	0.0011	0.0109	0.00724	0.01122	0.01184
0.000356079	0.0015	0.0086	0.00614	0.01231	0.01198
0.00348	0.0024	0.0064	0.01744	0.00529	0.00553
0.00375	0.0095	0.011	0.01059	0.01106	0.0132
1.61713e-07	0.0011	0.0168	0.00942	0.00726	0.00528
0.00442	0.001	0.0121	0.01266	0.00232	0.00111
0.01115	0.0026	0.0001	0.00724	0.00547	0.00259
0.00426	0.0011	0.011	0.01355	0.00426	0.00335
0.04385	0.0014	0.004	0.00708	0.00707	0.00434
0.0053	0.0016	0.0057	0.01074	0.01227	0.00125
0.00448	0.0003	0.0099	0.01697	0.0112	0.00456
0.01168	0.003	0.0095	0.03429	0.00621	0.00199
0.01246	0.0012	0.0089	0.00539	0.01346	0.01542
0.00747	0.0039	0.0121	0.00995	0.01013	0.00977
0.004	0.0043	0.0016	0.00602	0.00748	0.01089
0.000949772	0	0.0241	0.01952	0.01408	0.00504
0.00999	0.0027	0.0102	0.0115	0.00625	0.00469
1.34186e-12	0.0016	0.0202	0.00671	0.0053	0.00284
0.00623	0.0032	0.0126	0.00192	0.00982	0.01301
0.00686	0.0017	0.0323	0.02045	0.01302	0.01477
0.00355	0.001	0.0123	0.01013	0.01027	0.00747
7.05367e-05	0.0024	0.0108	0.01194	0.00378	0.01384
0.000500896	0.0011	0.013	0.01594	0.01126	0.01141
0.00268	0.0002	0.0137	0.00448	0.01038	0.01115
0.01133	0.0018	0.0118	0.04373	0.00734	0.01145
1.57774e-05	0.0011	0.0153	0.00046129	0.05246	0.00931
0.000450099	0.0016	0.0125	0.01274	0.00901	0.00744
0.00873	0.0014	0.0098	0.01353	0.00341	0.01893
0.00277	0.0009	0.0212	0.02814	0.00619	0.01023
0.00334	0.001	0.0067	0.00529	0.01426	0.00666
0.00619	0.0014	0.009	0.00487	3.49773e-06	0.00482
0.01214	0.0026	0.0776	0.0041	0.00532	0.01123
0.00947	0.0078	0.0467	0.01878	0.01977	0.0091
0.00836	0.0021	0.0176	0.01291	0.00972	0.00634
5.55156e-15	0.0041	0.0035	0.02541	0.01027	0.00811
0.00563	0.0004	0.0116	0.01726	0.00871	0.05472
0.00117	0.0014	0.0305	0.00629	0.00754	0.01142
0.00215	0.0044	0.0184	0.02899	0.0133	0.0132
0.00672	0.0038	0.0165	0.00728	0.00816	0.00961
0.00052702	0.0005	0.0089	0.000570808	0.02503	0.01182
1.32509e-14	0.0244	0.0133	0.02245	0.01219	0.03058
0.0011	0.0013	0.0113	0.02009	0.01376	0.00548
0.000288285	0.001	0.006	0.0056	0.000480931	0.00073986
0.000995968	0.0016	0.0117	0.00956	0.00493	0.00244
0.00584	0	0.0132	0.01099	0.01599	0.01269
0.00359	0.0101	0.0104	0.01095	0.0148	0.0093
0.00159	0	0.0163	0.05952	0.01116	0.00154
0.01064	0	0.0078	0.01045	0.00621	0.01129
0.00255	0	0.0073	0.01207	0.01118	0.00475
0.01065	0.0056	0.0416	0.00401	0.01298	0.00032503
0.01045	0.0007	0.0027	0.01535	0.01316	0.00537
0.0028	0.0002	0.0169	5.62892e-06	0.00513	0.01114
0.0074	0.0013	0.0123	0.01363	0.01138	0.01097
0.0098	0.0036	0.0071	0.01187	0.00355	0.00254
0.0125	0.0014	0.0054	0.0034	0.01925	0.00408
0.0134	0.002	0.0208	0.01859	0.00451	0.00272
0.0176	0.0015	0.0159	0.01404	0.01421	0.01126
0.0078	0.0003	0.0087	0.01127	0.01234	0.01508
0.0203	0.0013	0.0219	0.0166	0.0132	0.00344
0.009	0.0002	0.0099	0.00812	0.00562	0.00649
0.0132	0.0024	0.0149	0.01098	0.01186	0.0155
0.0071	0.0042	0.0016	0.00607	0.000774552	0.01137
0.0071	0.0051	0.0061	0.01446	0.00461	0.000928054
0.0076	0.0011	0.0091	0.00645	0.00475	0.0056
0.0097	0.0013	0.0072	0.01539	0.01029	0.0048
0.017	0	0.0094	0.0103	0.01145	0.0059
0.0111	0.0005	0.0196	0.01166	0.01241	0.01198
0.0111	0.0011	0.0116	0.01254	0.01321	0.01213
0.0102	0	0.0131	0.02344	0.00613	0.0135
				0.00659	0.00691
				0.01342	0.01395
					0.0124
					0.00145
