# Supplementary material for: Cell crowding activates pro-invasive mechanotransduction pathway in high-grade DCIS via TRPV4 inhibition and cell volume reduction
Source: eLife. 2025 Apr 21;13:RP100490. doi: 10.7554/eLife.100490 (PMC12011371; doi:10.7554/eLife.100490)
Supplement: Figure 5—source data 9. [file elife-100490-fig5-data9.xlsx]

## Sheet: Sheet1
Numerical data for Figure 5J - for cell velocity (um/s) of single ND DCIS.com cells
ctrl	GSK1L	GSK1H	GSK2L	GSK2H	PEG
2.95019	0.406	3.0478	4.32232	2.77711	2.24537
1.8558	7.1403	2.197	2.82275	2.7544	2.06973
0.42677	6.6341	3.0369	1.93736	1.66948	3.01645
1.32549	7.0531	2.5136	1.73817	2.74514	2.22275
2.92158	1.5316	0.4099	1.25551	1.15612	3.03655
1.83202	4.852	1.6401	1.79509	1.0037	2.13398
0.66865	0.2043	2.0752	4.56147	3.13795	3.09545
1.38362	5.6968	2.6407	3.34054	2.43645	2.82682
0.70306	0.9773	2.7565	2.88565	2.77928	1.21763
1.61156	7.4506	2.1036	3.96897	2.0718	2.91466
3.01122	5.7985	1.5072	2.98953	1.05273	3.10744
0.52484	4.347	3.0873	1.55564	1.2021	1.4197
0.10037	4.378	3.1011	2.50843	2.73187	2.23793
3.07655	2.2225	2.9448	2.90386	2.23931	2.89248
1.01238	7.5419	3.2512	0.59932	2.93873	1.33883
2.28737	0.0271	2.5554	1.63224	0.4145	2.70839
2.7316	0.3384	1.6929	2.82909	1.06732	1.99305
2.79853	6.8356	2.2455	3.02238	2.69786	3.00598
0.68856	4.3523	2.8074	2.83894	2.12078	1.86925
0.49749	0.397	2.5186	2.89715	1.47911	3.13734
0.4577	4.4728	1.1985	3.84476	2.41038	2.4531
1.17497	4.3012	1.9599	4.08683	2.89229	3.03698
0.9995	6.7922	2.782	2.95707	2.5604	2.46284
0.67939	6.5601	2.903	4.30952	2.23156	1.9368
3.18575	4.1395	2.184	0.85663	2.14369	2.55248
0.63367	7.4104	1.1548	2.95914	2.26684	2.94015
1.66585	4.8011	0.3319	1.94094	1.8078	1.62053
0.64885	0.2793	3.0655	2.94976	2.7824	1.66354
2.78113	3.0042	2.7206	1.18916	2.93604	3.02583
0.67801	6.7847	2.0135	2.70877	1.18242	2.71815
0.62989	1.8275	2.8906	1.84717	2.82766	2.31471
0.65236	6.7458	2.8012	2.28314	2.84648	2.91727
0.43968	7.9245	2.3093	1.5016	2.9773	2.88351
1.83063	2.8648	2.1882	2.87056	1.95237	1.99344
1.9066	2.9779	2.8091	2.75872	2.84933	3.07637
0.93815	6.8467	1.9718	2.60471	2.24095	1.94985
1.40339	6.6688	2.986	2.69001	1.29166	0.89353
2.91705	4.9606	0.2775	2.27404	1.415	1.36744
1.50557	6.6993	2.8237	1.40547	2.16836	1.55253
3.2971	1.7045	1.6389	2.25476	2.25745	1.76763
1.92412	7.3852	1.9665	2.77217	2.97288	0.93978
1.80005	0.4488	2.646	3.49746	2.8332	1.7838
2.97391	3.357	2.6029	3.27517	2.13973	1.21597
2.80022	7.0559	2.5278	1.9715	3.11512	2.73288
2.66782	2.5729	2.8765	2.67935	2.7007	2.65096
1.91044	3.6183	1.0804	2.0869	2.33017	2.80037
0.71744	0.2366	2.7729	2.53374	3.18209	1.89782
3.46766	3.8376	2.2552	1.50703	2.1429	1.81973
1.05057	3.7743	2.4432	2.17337	1.92535	1.42578
1.37018	2.8649	3.0152	1.19991	2.66257	3.04055
2.12959	3.238	3.1903	3.60751	3.0613	3.2605
1.90883	4.8748	2.8454	2.71043	2.71382	2.31942
0.37768	4.064	2.7821	2.91414	1.62526	2.92644
0.68727	6.7785	3.0678	3.27939	2.84739	2.86392
1.40258	0.3183	3.1424	1.80169	2.73444	2.8324
2.8516	4.6209	2.9025	5.59557	2.29345	2.87055
0.5791	4.014	2.3501	0.76311	4.21002	2.59085
0.50267	3.8518	3.0045	2.74218	2.54439	2.31678
2.46009	7.8089	2.6606	2.46888	1.56743	3.05653
1.46081	5.8317	3.9166	2.02323	2.11181	2.71298
1.24066	3.5837	2.1991	3.63195	2.91261	2.16957
2.42012	7.7762	2.4816	1.86811	0.64196	1.86166
2.92255	3.3056	4.7353	1.71298	1.96013	2.84356
2.41185	3.0494	3.6147	2.88769	2.27464	1.76073
2.27992	6.8315	3.5675	2.95107	2.6423	2.13454
0.10685	4.8197	1.5945	2.76991	2.71659	2.41349
2.04407	1.9868	2.8905	4.22487	2.50267	4.29589
0.9362	2.7545	2.4143	2.12079	2.33774	2.87006
1.33651	3.55	2.3527	4.12028	3.09312	3.08254
2.81507	4.4027	3.4354	1.193	2.42143	2.61704
1.26615	4.7322	2.5239	3.40056	2.81201	2.91955
0.87325	4.1357	3.0829	4.00146	2.96244	3.26939
1.29348	7.5771	2.8146	3.79562	3.14377	1.98829
0.32775	6.3709	2.0785	2.02292	0.52649	0.72672
0.35334	7.771	2.3171	2.61948	0.61973	0.95341
2.00367	0.2723	3.0761	2.80502	3.40324	3.02318
1.79215	2.8355	2.7289	3.34578	3.46746	2.20116
1.03462	0.2881	2.761	5.14486	2.83699	1.03194
2.53615	0.3661	2.3734	2.75195	2.11805	2.85133
1.11444	0.1204	2.2962	2.28787	2.83728	1.84472
2.78179	3.2886	3.2614	3.15053	3.03499	0.4863
2.7238	4.8043	2.7927	1.29676	3.06796	1.95777
1.5826	1.3205	3.4942	0.97545	1.92079	2.84224
2.3152	1.3225	2.9701	1.24526	2.87441	2.82084
2.647	3.8342	2.2664	2.92251	1.59821	1.35487
3.2305	1.3173	1.7881	0.34177	3.72262	3.68421
3.1399	6.8773	2.2058	2.66905	1.77921	1.40106
3.4585	8.0467	3.3437	3.17228	3.27359	2.84571
1.0248	3.4748	2.4958	1.1407	2.97752	3.29546
3.0975	6.3503	2.7138	3.45824	3.07786	1.57269
2.5474	0.8783	2.6698	0.69483	2.0074	2.17713
2.6504	5.9661	2.353	2.82508	2.89578	2.63169
2.4513	4.7714	1.0684	1.98192	0.76085	2.8282
2.2619	4.5824	2.0873	3.21492	1.82234	0.8215
2.3172	6.698	3.131	2.14715	1.84974	2.00601
2.6443	7.4282	1.592	3.34037	2.7952	1.85566
2.4589	0.2462	2.5901	2.73044	2.88725	1.86322
2.8281	4.7131	3.749	2.22397	2.98663	2.93565
2.7941	5.4081	2.8825	2.95432	3.09682	2.95542
2.7797	0.1851	3.0837	4.09201	1.27084	3.19244
				2.1717	2.22664
				3.10833	3.16929
					2.99053
					1.00813
