# Supplementary material for: Cell crowding activates pro-invasive mechanotransduction pathway in high-grade DCIS via TRPV4 inhibition and cell volume reduction
Source: eLife. 2025 Apr 21;13:RP100490. doi: 10.7554/eLife.100490 (PMC12011371; doi:10.7554/eLife.100490)
Supplement: Figure 5—source data 11. [file elife-100490-fig5-data11.xlsx]

## Sheet: Sheet1
Numerical data for Figure 5L - for correlating between cell D and % PM TRPV4 fraction
	V	D
DCIS ND	4575	0.0087
DCIS ND GSK1 0.05 pM	6753
DCIS ND GSK1 0.2 pM	6601	0.002
DCIS ND GSK2 0.2 nM	5483
DCIS ND GSK2 1nM	3471	0.012
ND PEG 2%	4033	0.014
