# Supplementary material for: Cell crowding activates pro-invasive mechanotransduction pathway in high-grade DCIS via TRPV4 inhibition and cell volume reduction
Source: eLife. 2025 Apr 21;13:RP100490. doi: 10.7554/eLife.100490 (PMC12011371; doi:10.7554/eLife.100490)
Supplement: Figure 5—source data 12. [file elife-100490-fig5-data12.xlsx]

## Sheet: Sheet1
Numerical data for Figure 5M - for correlating between cell D and % PM TRPV4 fraction
	Invasive fraction	D
DCIS ND	30.99	0.0087
DCIS ND GSK1 0.05 pM	28.48
DCIS ND GSK1 0.2 pM	24.22	0.002
DCIS ND GSK2 0.2 nM	43.8
DCIS ND GSK2 1nM	55.37	0.012
ND PEG 2%	56.96	0.014
