# Supplementary material for: Cell crowding activates pro-invasive mechanotransduction pathway in high-grade DCIS via TRPV4 inhibition and cell volume reduction
Source: eLife. 2025 Apr 21;13:RP100490. doi: 10.7554/eLife.100490 (PMC12011371; doi:10.7554/eLife.100490)
Supplement: Figure 6—source data 1. [file elife-100490-fig6-data1.xlsx]

## Sheet: Sheet1
Numerical data for Figure 6B - for % PM TRPV4 comparisons in MCF10CA1a cells
ca1a ND CTRL	ca1a ND GSK1	ca1a ND GSK2	ca1a ND PEG	ca1a OC CTRL
33.225	39.337	58.895	34.633	76.0984
25.4301	40.6212	46.2907	45.9893	74.4939
42.9606	45.2555	70.5677	34.6278	82.4719
45.005	41.1081	72.6744	37.8641	82.0513
16.2129	41.5446	68.2665	58.4211	56.6529
41.4902	42.624	67.6175	60.2849	76.4341
26.3418	17.3752	68.23	49.1021	76.9948
28.5446	33.3333		54.1775	62.2291
35.445	33.3333		70.3005
31.1553			56.2955
