# Supplementary material for: Cell crowding activates pro-invasive mechanotransduction pathway in high-grade DCIS via TRPV4 inhibition and cell volume reduction
Source: eLife. 2025 Apr 21;13:RP100490. doi: 10.7554/eLife.100490 (PMC12011371; doi:10.7554/eLife.100490)
Supplement: Figure 6—source data 2. [file elife-100490-fig6-data2.xlsx]

## Sheet: Sheet1
Numerical data for Figure 6C - for D and v values of single MCF10CA1a cells
ctrl-D	ctrl-v	gsk1-D	gsk1-v	gsk2-D	gsk2-v	peg-D	peg-v
0.01142	2.86384	0.00373	4.11525	0.01067	2.78075	0.00703	2.25135
0.00908	2.30747	0.00151	6.26229	0.01575	2.74312	0.00998	2.68159
0.01209	2.38948	2.69896e-06	0.09801	0.01221	3.2481	0.01129	2.86219
0.01063	2.77303	0.00094738	4.74442	9.19489e-07	3.04124	0.01288	3.05354
0.01411	3.00363	4.13237e-05	0.23791	0.01381	3.13729	0.00701	2.25676
0.00812	2.38048	0.0035	2.59265	0.02054	1.8928	0.00752	2.35148
0.04113	3.65861	0.00153	6.28496	0.01281	3.04086	1.50745e-07	0.26912
0.00263	1.36677	0.00273	2.77265	0.00389	1.41898	0.01058	2.64633
0.01463	3.03531	0.00374	4.91425	0.00156	1.12658	0.01067	2.78235
0.01248	2.99835	0.00211	3.48392	0.10018	5.08851	0.01169	2.91922
0.01295	2.80799	0.0059	3.7496	0.01198	2.93864	0.01054	1.8043
0.0101	2.25147	1.88204e-06	0.08989	0.00825	2.44281	0.01689	2.83753
0.01256	2.6714	0.00171	6.64719	0.02134	3.4532	0.0135	3.11807
0.01354	3.11724	0.00149	5.50707	0.00707	1.22375	0.0037	1.40875
0.00217	1.25762	0.00192	7.04694	0.00561	2.17793	0.01025	2.76222
0.01158	2.83899	0.00191	7.03249	0.02832	3.14948	0.00744	1.43474
0.00997	2.68487	0.0022	4.10223	0.02811	2.95374	0.01165	1.8843
0.03943	3.16331	1.6796e-06	0.19371	0.02015	2.61182	0.01288	2.74695
0.0106	2.74048	7.90923e-07	0.03085	0.01266	1.31416	0.00867	2.52781
0.01531	1.9902	3.91681e-05	0.92847	0.01555	2.91302	0.0093	2.51758
0.00715	2.26178	5.10182e-06	0.04127	0.01621	1.69261	0.01136	2.83599
0.01023	2.72563	0.00317	3.99057	0.01446	2.84773	0.01161	2.87739
0.00509	1.92478	0.000669583	4.14322	0.0133	2.06624	0.00417	1.16829
0.01532	2.9472	0.00174	6.70556	0.01421	2.69503	0.00748	2.08926
0.00988	2.66853	2.17347e-05	0.07394	0.01896	2.62444	0.01552	2.95092
0.00957	2.06631	0.00286	5.15448	0.02091	1.24161	0.00344	1.56441
0.00349	1.59009	0.00212	6.8291	0.00918	2.22064	0.0081	2.44579
0.01332	0.52306	1.72134e-05	0.11157	0.02305	2.87875	0.00517	1.93425
0.01647	2.68949	0.0033	4.93107	0.01312	1.41238	0.01121	2.84709
2.52143e-07	1.76128	8.5455e-06	0.35543	0.02336	2.58583	0.0174	3.05847
0.06771	4.69749	0.000678933	1.96525	0.00543	2.22246	0.01003	1.14442
0.01203	2.85295	0.000977135	2.28823	0.02073	2.88131	0.00842	1.85172
0.0123	2.97347	2.27192e-06	0.17894	0.01219	2.5749	0.00793	2.40277
0.00312	1.50446	0.00232	6.69107	0.01747	2.65476	0.00703	2.14602
0.00918	1.17605	0.000439519	3.36748	0.0134	3.08673	0.00442	1.84924
0.00557	2.00866	0.00129	5.76397	0.01596	2.52337	0.00851	2.15616
0.01329	2.72733	0.00535	4.22828	0.00852	2.74502	0.01249	2.70249
0.00221	1.27579	0.00103	3.546	4.58449e-07	2.15188	0.01354	2.46387
0.01375	2.92357	0.00147	6.17315	0.01794	2.52097	0.01732	3.4933
0.0124	2.98609	0.00349	4.18892	0.02076	3.44922	0.00564	2.0149
0.0047	1.81403	0.00187	5.27758	0.01535	3.23931	0.01175	2.93063
0.00827	2.36973	5.09198e-06	0.13808	0.01526	3.27507	0.01008	2.6546
0.01189	3.0115	0.00185	6.29291	0.01056	2.76401	0.01013	2.624
0.01119	2.81738	0.000276325	2.65662	0.00334	1.49578	0.00641	2.18746
0.01811	2.47904	0.00276	1.90045	0.00697	2.17604	0.02096	3.83632
0.01017	2.68887	0.0021	3.37866	0.0149	3.19296	0.01313	3.20859
0.01197	2.98306	0.00173	6.68847	0.01107	2.72523	0.00829	2.44048
0.01673	2.43061	0.0039	4.96931	2.11921e-07	2.29417	0.00567	2.74158
0.00755	2.25626	0.00175	6.73892	0.01785	3.05821	0.00537	1.98103
0.03059	2.81968	8.78672e-05	1.48401	0.16128	7.42774	0.01024	2.54834
0.01284	3.04281	0.00449	3.71583	0.01393	2.72158	0.00781	1.78501
0.0107	2.82043	0.00192	5.21773	1.37447e-06	2.00734	0.01041	2.72507
0.01125	1.9166	2.98126e-06	0.16703	0.01332	2.96192	0.01042	2.73648
0.00588	2.05921	0.000184815	1.19233	0.00877	2.37385	0.01228	2.90799
0.00187	1.12507	0.00145	4.61051	0.00926	1.0463	0.01206	2.99427
0.00397	1.69664	0.01447	2.65226	0.01739	2.571	0.00685	2.32187
0.00827	2.42829	0.000251394	1.96326	0.01398	2.0725	0.01172	2.92235
0.01571	2.32638	0.000167741	2.01134	0.01493	3.16774	0.0126	2.19953
0.01016	2.6739	0.00108	5.04721	0.000913451	0.8387	0.0139	2.98798
0.01863	1.66191	0.00236	4.93604	0.01021	1.70127	0.01203	3.02694
0.01706	2.71235	0.00481	4.4031	0.00379	3.6185	0.0116	2.9124
0.00322	1.5615	7.32058e-06	0.13052	0.01809	0.87733	0.00838	2.47353
0.00543	1.9276	0.000164048	2.05247	0.00634	1.96692	0.01107	2.82773
0.01178	2.91382	0.0033	4.67854	0.01018	2.73556	0.00803	2.35819
0.01532	2.94249	0.00279	5.75014	0.01069	2.62086	0.0103	2.72784
0.00404	1.42192	0.00126	5.71388	0.0169	2.14162	0.00941	2.56515
0.00722	2.26808	0.00185	6.89944	0.02454	2.85179	0.0133	2.8858
0.01597	2.40551	0.00244	5.12359	0.000367891	0.52648	0.0106	2.80045
0.01087	2.55313	0.00152	6.27256	0.01101	2.81944	0.0085	2.80778
0.00946	2.60178	2.96929e-06	0.07082	0.00854	2.63495	0.00641	2.27078
0.01268	2.11907	0.00125	5.67781	0.00885	2.63032	0.00601	1.96177
0.01187	2.89293	0.00153	6.29062	0.0151	3.30179	0.00229	1.11755
0.01248	2.97	0.00461	3.4572	0.0142	1.67426	0.00223	0.56144
0.0085	2.47464	0.00237	5.42483	0.01173	2.51645	0.005	1.89546
0.01413	2.76864	0.000282772	2.70284	0.0031	1.60395	0.00714	2.20484
0.00821	2.42962	0.000867884	4.74095	0.01027	2.61038	0.00989	2.68942
0.01058	2.77412	0.000924432	4.89477	0.01063	1.93548	0.01244	3.10185
0.01294	3.07446	0.0019	7.0161	0.00655	2.16293	0.00591	2.08954
0.01186	2.91883	0.00087026	0.93696	0.0151	2.96348	0.00514	2.03602
0.00938	2.61104	3.98581e-06	0.25028	0.01453	2.91602	0.00595	2.08716
0.00319	1.45029	5.55166e-15	0.04385	0.00928	2.65724	0.01235	3.03778
0.00248	1.33797	0.00128	5.73639	0.01068	2.37372	0.00535	1.94893
0.01332	2.66272	0.00121	5.58916	0.01092	2.67912	0.00765	2.35252
0.01392	2.45633	5.93731e-06	0.16287	0.01003	2.71108	0.01325	3.02074
0.0082	2.3949	0.00119	3.99949	0.01445	2.83316	0.01136	2.72517
0.01193	2.94842	0.00125	5.69802	0.01383	2.84637	0.01084	2.75662
0.01013	2.66893	0.00362	3.34849	0.00836	2.05553	0.01291	3.05834
0.00899	2.15403	0.00206	5.19813	0.02171	3.57198	0.00321	1.5286
0.00139	1.00135	0.000324406	2.37557	0.01754	2.27801	0.00347	1.58489
0.0062	2.07599	0.00309	2.76281	0.01207	1.03472	0.01212	2.89689
0.01142	1.24223	0.00126	5.71219	0.01631	3.06929	0.00162	0.95688
0.01295	2.2702	6.20911e-05	0.10178	0.01196	2.25605	0.01039	2.76724
0.000372832	0.343	0.00411	3.71484	0.01361	3.09713	0.01475	3.00187
0.00684	2.00556	0.00247	4.74919	0.00662	2.19233	0.00985	2.48114
0.00302	1.4707	0.00125	5.4916	0.01657	3.42155	0.00617	2.15103
0.01087	2.10599	0.000429056	3.33173	0.01664	3.58767	0.00648	1.75544
0.00407	1.73711	5.20653e-05	0.27335	0.01243	2.76023	0.01078	2.65612
0.01153	2.87261	0.00332	4.34194	0.0124	2.24122	0.01128	2.89388
0.00276	1.79326	3.40884e-07	0.2038	0.00508	1.55678	0.0127	2.99061
0.00916	2.57194	0.00193	7.06743	0.01706	2.93476	0.01432	2.89158
0.03237	3.19243	0.00042256	2.2378	0.05878	4.28025	0.00301	1.56134
0.01181	2.91452	0.00136	5.93207	0.0052	1.85882	0.01318	3.09794
0.01117	2.71339	2.50551e-06	0.17935	0.01099	2.2734	0.0125	2.55754
0.01654	2.93986	0.0016	6.44383	0.02029	3.02796	0.01228	2.82577
0.0029	1.30059	0.00226	2.43552	0.0068	0.49724	0.00931	1.22573
0.01021	2.7175	0.000641029	3.47837	0.01107	2.00761	0.01139	2.86128
0.01079	2.62282	0.00103	5.13894	0.00322	0.64357	0.01104	2.60141
0.00862	2.01663	0.000675215	4.18349	0.01059	2.82868	0.01434	2.69299
0.00755	2.34307	0.0014	5.52708	0.00806	2.25586	0.00748	2.29551
0.01199	2.93441	0.000418898	2.64529	0.01174	2.95003	0.01219	2.93245
0.00998	2.3462	0.000981755	4.70581	0.01189	2.95024	0.01289	3.05418
0.01374	2.56424	0.00357	3.20617	0.01039	2.68759	0.01299	3.03199
0.0249	2.617	0.0017	6.62985	0.00922	2.37202	0.000806467	0.30118
0.00518	1.94234	5.27739e-05	1.03639	0.01194	2.89771	0.01247	2.71662
2.15521e-07	0.09766	0.00536	1.53272	3.8312e-06	1.52526	0.01175	2.90978
0.02946	2.72247	0.00018573	1.42659	0.0063	2.16353	0.01133	2.68684
0.00748	2.32111	0.00265	2.68644	0.01238	3.35807	0.0068	2.1332
0.0132	2.13008	0.00185	6.92945	0.0245	2.37314	0.01135	1.47335
0.01896	3.23261	9.11033e-05	1.53446	0.01592	2.7912	0.01573	2.67115
0.00862	2.0865	6.01409e-05	0.4261	0.01219	2.96947	0.00482	1.85286
0.00261	1.27674	0.0016	6.44214	0.02487	2.18809	0.00666	2.1885
0.00536	1.452	0.00136	5.9197	0.01012	3.24794	0.01268	2.50413
0.01013	2.70202	6.33377e-07	0.02502	0.02375	3.77308	0.01003	2.67473
0.00124	1.3981	0.00252	6.16651	0.03638	4.15786	0.01083	2.18953
0.01056	2.94094	5.4715e-05	0.84751	0.01613	3.35364	0.01316	3.1688
0.01424	2.92819	0.00156	2.96219	0.00913	0.81598	0.01264	2.67768
0.01106	2.82913	0.00135	5.90932	0.01233	2.52326	0.01735	3.08182
0.01164	2.88257	6.97369e-07	0.04417	0.01581	2.68942	0.00304	1.51519
0.01179	2.90071	0.000580802	2.76802	0.01008	1.76785	0.00664	2.12742
0.01228	2.98393	0.000161484	1.88109	0.00233	1.23772	0.00608	2.15399
0.00757	2.45519	0.00017388	1.14485	0.01326	1.29697	0.01144	2.71356
0.0127	2.79063	0.00408	3.25441	0.01963	3.79483	0.00808	2.24137
0.00873	2.30693	0.00176	3.06897	0.00996	2.49607	0.0114	2.84772
0.01627	1.82933	0.00261	3.78844	0.01138	3.13439	0.00815	1.35144
0.01286	2.86481	0.000682386	4.1939	0.04103	3.92875	0.00727	1.49718
0.01198	2.93637	0.00158	6.38501	0.0061	2.15883	0.01218	2.64511
0.01673	1.77719	0.00457	4.05734	0.04719	4.53176	0.014	3.18037
0.01009	1.5354	0.00159	2.90107	0.000398666	0.55875	0.0112	2.86206
0.00551	1.98314	0.0015	3.48302	0.0152	2.89743	0.01255	1.97932
0.0112	2.84232	0.000848223	4.68869	0.02104	1.64484	0.00491	1.90525
0.00607	2.09013	0.000434656	1.31227	0.01253	1.4883	0.0131	2.87065
0.00144	1.03034	0.00137	3.74936	0.01531	1.3183	0.01105	2.8755
0.01057	2.76449	0.00189	7.00136	0.00265	1.76148	0.01198	2.85956
0.0025	1.33121	3.53573e-06	0.16094	0.01508	2.85242	0.00752	1.90476
0.01031	2.67624	0.00272	1.97917	0.02922	2.59911	0.00929	2.69495
0.01198	2.93884	0.00142	5.04694	0.01388	3.10313	0.00779	2.35893
0.01158	2.88162	0.00343	4.05844	0.01335	2.9518	0.0138	3.14033
0.00526	1.90937	0.00159	5.00581	0.00215	1.47203	0.01715	3.07214
0.00816	2.21602	0.00176	6.74858	0.00501	1.61883	0.01312	3.07671
0.01232	2.98171	0.000733007	3.55429	0.00352	1.194	0.01236	2.92732
0.01468	1.99478	0.00139	5.74631	0.01478	1.54258	0.00996	2.66777
0.01295	3.02352	0.000447754	3.32383	0.01326	3.10043	0.01343	2.9966
0.01268	2.89836	0.00424	4.71038	0.01385	3.1906	0.00789	2.32475
0.00714	2.25639	0.00013456	1.8326	0.01321	3.96199	0.00311	1.48884
0.00928	2.55325	0.000751839	4.39769	0.0135	3.14237	0.00794	2.17085
0.01207	2.80104	0.00294	5.09021	0.00447	2.47381	0.01202	2.89461
0.00248	1.34188	5.24167e-06	0.21694	0.00327	1.27057	0.0121	2.9401
0.01387	3.34135	6.43736e-06	0.38574	0.00818	2.32818	0.00222	0.76942
0.01113	2.83567	0.00578	3.90043	0.02719	2.69041	0.00656	2.37148
0.00331	1.55449	1.50664e-05	0.03386	0.02979	3.9503	0.0114	2.72684
0.00534	1.78469	0.00514	3.96521	0.01818	2.42913	0.01399	3.12119
0.01938	2.38303	0.00351	4.43081	0.0048	2.23038	0.00503	1.85321
0.01193	3.02318	0.0035	3.71893	0.01483	2.06494	0.01013	1.68992
0.00609	2.09205	1.11886e-05	0.1884	0.00941	2.61453	0.00162	1.0761
0.00421	1.7721	0.00264	4.82006	0.01484	2.38513	0.00765	2.15385
0.00521	1.93195	0.00259	5.62602	0.00867	2.53771	0.00906	2.38929
0.01949	3.08754	5.37228e-05	0.10735	0.0164	3.0783	0.01402	2.99596
0.0141	2.14967	0.00187	3.53796	0.01058	2.76539	0.01509	2.93505
0.00697	1.56639	2.37219e-06	0.15089	0.01504	3.08411	0.01862	3.02845
0.01078	2.25025	0.00273	2.95866	0.00291	0.5134	0.01174	2.80626
0.00871	2.19077	0.000177617	2.01738	0.02657	3.22871	0.01257	3.02582
0.00635	2.46906	0.00196	6.46526	0.01905	2.17648	0.00889	2.58369
0.01223	2.93292	0.00956	3.027	0.01479	3.29177	0.01122	2.82861
0.01282	2.92413	4.30935e-05	0.23174	0.01994	2.88102	0.01098	2.81608
0.00794	2.39935	0.00277	3.27864	0.01303	2.57337	0.00594	1.39445
0.00667	2.19169	0.00119	5.55944	0.002	1.26504	0.00724	2.30229
0.009	2.53871	0.00462	3.78532	0.00621	1.40049	0.00643	1.77965
0.0118	2.91784	0.00179	3.52673	9.17617e-05	0.22563	0.00669	1.8822
0.00308	1.49497	0.00171	6.64754	0.0044	1.76988	0.01197	2.95366
0.06267	4.51693	0.000714747	2.63828	3.47917e-05	1.24349	0.00494	1.86525
0.00597	2.08004	0.000106803	1.5808	0.00307	1.48379	0.00627	2.1305
0.01869	2.94793	0.00502	2.32385	0.01331	2.1628	0.00916	2.44371
0.0133	3.09582	0.000305831	0.50014	0.0066	1.83472
0.01088	2.27444	0.00177	6.77111	5.02263e-06	2.21206
0.05869	4.35076	3.8136e-05	0.21655	0.01138	1.61756
0.02543	3.62319	0.000837244	3.16537	0.01327	3.09094
0.00969	2.51072	0.00156	5.05688	0.01238	0.85871
0.00646	2.17647	0.00162	6.48615	0.02376	3.95384
0.0117	2.86975	4.43135e-06	0.28665	0.0161	2.1821
0.00785	1.16579	5.85908e-05	1.11469	0.01307	1.86418
0.01277	2.4871	0.00256	3.23179	0.01722	2.21351
0.0141	3.19913	0.00347	4.48636	0.00988	2.81705
0.01296	3.05832	0.00185	4.56767	0.00365	1.65901
0.01135	2.85227	0.00511	3.7785	0.01067	2.74209
0.05297	3.40639	0.000568485	3.82477	0.00961	1.91662
0.0078	2.37127	1.41511e-07	0.0082	0.01587	3.48288
0.01226	2.89527	0.00131	3.84199	0.01472	2.97754
0.00433	1.73325	0.00104	5.20126	0.01557	3.39188
0.00924	2.06988	0.00111	5.35695	0.01129	2.88854
0.00844	2.47049	0.000106751	1.54847	1.12341e-08	1.04963
0.01064	1.7165	0.00358	4.63205	0.01122	2.86963
0.01114	2.83706	0.00282	5.87328	0.02402	1.48176
0.00452	1.80377	0.00291	3.53954	0.01647	2.97212
0.0059	2.04234	5.55151e-15	0.13659	0.02028	3.81228
0.0137	1.25992	0.00108	5.29616	0.01697	3.07155
0.01045	2.75507	1.00624e-05	0.29604	0.011	3.32029
0.01202	2.94962	0.00177	6.76952	0.00143	0.89221
0.01095	2.81742	0.00104	5.18208	0.01103	0.82047
0.0166	1.31826	0.00286	4.82301	0.00845	2.49232
0.00502	1.90181	0.000351925	0.53268	0.00451	1.69816
0.01248	3.00176	1.23778e-05	0.16226	0.00994	2.55517
0.00727	2.24234	0.00294	4.72615	0.01723	3.00855
0.00334	1.54715	0.000644425	4.08236	0.04668	3.61254
0.01924	1.49116	0.000292784	2.75105	0.01147	2.87647
0.01027	2.71984	0.000281169	2.67407	0.00558	2.01863
0.01644	2.34345	0.00157	6.38118	0.00808	2.59824
0.01216	2.95672	4.49645e-14	0.16298	0.00272	2.23152
0.01326	2.3443	0.00138	3.83578	0.00596	2.0545
0.02888	4.13081	1.13361e-05	0.09606	0.00585	2.02522
0.00821	1.99723	0.00034362	0.53504	0.01019	2.89786
0.00232	1.34227	5.62987e-06	0.18766	0.0135	3.07863
0.0063	2.12557	0.00851	2.4943	0.02946	3.0363
0.01309	3.07071	0.003	2.24375	0.08522	5.10951
0.00961	2.62437	0.00579	3.30737	0.01203	2.98676
0.00427	1.75533	0.00605	2.06963	0.05486	4.28394
0.00768	2.35349	0.00627	2.93251	0.01698	3.05244
0.00971	2.35736	0.00596	3.16347	0.01804	3.07434
0.02076	2.74748	0.00648	3.29861	0.01179	2.9346
0.00798	2.39732	0.0043	2.83647	0.02909	4.67066
0.02322	1.97111	0.00158	3.81408	0.01037	2.7255
0.00517	1.92481	0.0077	2.34592	0.01507	2.77936
0.01122	2.84106	0.00919	2.57306	0.00401	2.53733
0.00863	1.68068	0.00648	3.51271	0.00431	1.59226
0.00892	2.52112	5.56299e-15	0.39835	0.00903	1.53478
0.00637	1.96531	0.00738	3.26134	0.01913	3.10949
0.00758	2.17629	2.72761e-07	0.06848	0.06554	4.64043
0.17872	6.93707	0.0096	3.01835	0.0044	1.88926
0.0838	4.5269	0.00374	2.3173	0.00973	2.66654
0.01049	2.74982	0.007	3.42976	0.01191	2.92597
0.01696	2.51351	0.00434	3.05761	0.01575	3.13848
0.01052	2.16341	0.00448	2.52973	0.00729	2.29175
0.000507538	0.60506	0.0053	2.02568	0.00468	1.98586
0.01125	2.84695	0.000346753	0.47586	0.00717	1.74378
0.00481	1.8562	0.000124843	1.15836	0.01032	2.44305
0.00641	2.13024	0.00853	2.8661	4.44354e-05	0.44019
0.01295	3.06103	9.24177e-05	1.27692	0.03572	3.03777
0.00559	1.88227	0.00669	3.09967	0.01146	3.20954
0.01212	2.95353	0.00987	2.66846	0.01672	3.46096
0.01268	3.01236	0.00103	1.52697	0.01385	1.48663
0.01202	2.94631	0.01141	2.38754	0.01273	2.77498
0.01109	2.83294	0.00573	1.58472	0.01196	2.89572
0.00735	2.29676	0.00802	1.95848	0.01304	2.93152
0.00886	2.49691	2.10059e-06	0.08526	0.00658	2.21201
0.01168	2.12239	0.00645	1.76433	0.01479	2.8798
0.01216	2.94401	0.01186	3.01296	0.01203	1.76182
0.16426	6.64449	6.37206e-07	0.30073	0.00424	1.72314
0.0116	2.88089	0.00621	3.86329	3.69968e-05	1.55508
0.0105	2.65716	0.000662819	0.5266	0.01717	2.43731
0.01218	2.94441	0.00318	4.26937	0.07275	4.33807
0.00644	1.96797	0.00348	4.18886	0.01924	3.13623
0.00651	2.15229	0.00187	6.52493	0.00507	2.14553
0.0147	2.46585	0.00748	2.15101	0.01594	2.62637
0.01044	2.74916	0.00077047	1.94332	0.00551	1.95904
0.01404	2.55476	0.000259718	1.15848	0.01353	3.17166
0.01225	2.99576	0.0123	2.28687	0.02639	2.40787
0.00606	2.08136	0.000682497	2.51382	0.0023	1.24675
0.01056	2.73061	0.0014	5.56783	0.00137	1.74043
0.01056	2.75358	0.00233	1.14563	0.00942	2.62304
0.01117	2.84033	0.00114	5.03244	0.01478	2.70491
0.00265	1.44931	0.0021	5.54616	0.00738	1.10958
0.02725	2.44033	0.000552173	2.48974	0.01451	3.29569
		0.00603	3.15821	0.02763	4.40557
		2.44933e-06	0.07508	0.00995	1.77746
		0.00162	6.01221	0.00543	2.17058
		0.00198	2.05412	0.01395	3.27866
		2.49515e-07	0.54518	0.0118	2.94388
		0.000265535	1.20687	0.01355	4.03383
		0.000570572	3.53008	0.02988	1.40624
		7.40432e-05	0.27774	0.02183	2.62632
		0.000881742	2.67907	0.01121	2.8453
		0.00208	5.33978	0.00898	2.5813
		1.66707e-05	0.16026	0.01005	2.70867
		0.00405	4.37641	0.0101	1.50575
		0.00664	2.85608	0.00986	1.81273
		0.000687726	0.85212	0.01272	1.68659
		0.00325	2.79429	0.00448	1.77802
		0.00357	4.93818	0.00182	0.94106
		0.0024	4.93579	0.02951	3.03956
		0.00193	6.42422	0.00198	1.22815
		0.00638	2.76301	0.02554	3.56408
		0.00501	2.56706	0.01274	2.86801
		1.66145e-06	0.09618	0.02165	1.19999
		0.000783673	2.99841	0.00491	1.89492
		0.00168	2.97193	0.01774	1.46947
		0.000234484	0.88077	0.00441	1.79043
		0.000257356	1.26593	0.01999	2.29204
		0.000330019	1.35946	0.000147478	0.23738
		2.95318e-13	1.0173	0.01929	2.57154
		0.000447566	1.65179	0.00691	1.29868
		0.00235	6.57256	0.0121	2.92087
		0.0053	2.1948	0.01423	2.83929
		0.000566935	1.29608	0.01146	2.84436
		0.00054583	1.53325	0.01254	1.5001
		0.00695	2.84552	0.0172	2.18139
		0.000346583	0.53246	0.01408	3.39543
		0.00612	2.35092	0.02079	2.60669
		0.00138	5.32897	0.01842	1.22936
		2.78273e-06	0.04639	0.0044	2.04504
		0.000794172	0.78335	1.86899e-07	0.25418
		0.00118	3.85307	0.0113	1.79866
		0.00701	2.88144	0.01237	2.01433
		0.000521187	0.32354	0.02676	3.57131
		0.00173	5.89911	0.00261	1.38165
		0.00221	6.6667	0.00872	2.43802
		0.00195	6.25995	0.01891	3.04335
		0.00229	6.7769	0.02845	4.01395
		8.88306e-06	0.19083	0.000871494	1.13397
		4.07072e-06	0.12292	0.00158	2.5351
		0.00518	4.01528	0.05208	4.51395
		0.00153	4.10273	0.0104	2.64946
		0.00121	1.93848	0.01965	2.99904
		0.00423	2.85558	0.00618	1.49986
		0.00103	4.46319	0.00709	2.24371
		9.43042e-07	1.05615	0.01334	3.11114
		7.27455e-05	1.06301	0.01683	2.86983
		0.00639	2.76381	0.01084	2.62994
		1.01907e-05	0.1785	0.0214	2.99344
		0.00204	6.25839	0.00995	2.42792
		0.00195	4.10302	0.00771	2.35355
		1.05343e-05	0.10655	0.00999	3.00886
		0.00147	3.05348	1.49553e-05	1.67647
		0.00673	2.54179	0.00971	3.42622
		0.000565357	2.20582	0.01188	2.49405
		0.0016	2.9486	0.01532	1.94394
		0.000148287	0.31704	0.01557	2.88713
		0.0025	2.17564	0.00983	2.67524
		1.96823e-05	0.11981	0.01122	2.49035
		0.00338	4.74966	0.01049	2.76001
		0.00251	1.744	0.00539	1.89432
		4.38019e-07	0.15367	0.01206	3.00244
		0.00038204	0.55487	0.02113	3.33412
		0.00113	1.63393	0.01452	1.44052
		0.00134	4.91621	0.00113	3.0626
		1.58159e-05	0.48499	0.00202	1.3917
		0.000639456	0.98253	0.00937	2.8802
		0.0021	4.01766	3.04015e-08	3.24616
		0.000786099	3.27106	0.02112	3.93683
		4.3279e-11	0.22675	0.00995	2.65619
		0.00937	2.12292	0.00262	1.95876
		0.00647	2.76243	0.03134	3.4401
		0.0109	2.78968	0.00778	2.53083
		0.00144	4.02753	0.00364	1.56038
		0.01059	2.08042	0.0012	0.87858
		0.00263	5.20327	0.00721	2.29202
		0.0032	4.78632	0.01001	2.48722
		0.000106399	0.32654	0.00407	1.1671
		0.00693	3.35206	0.01169	2.9022
		0.00126	4.69041	0.02151	2.18108
		0.00123	2.42903	0.00785	1.94355
		0.00153	3.33521	0.01416	3.17749
		0.00552	3.26179	0.0171	2.18113
		0.00637	3.70406	6.08529e-08	1.82142
		0.01829	2.2408	0.01409	3.19224
		1.65208e-05	0.22857	0.00791	0.76735
		0.000617278	3.21818	0.00272	1.40925
		0.00161	5.19487	0.00804	2.65776
		0.00157	5.12894	0.0059	2.48287
		4.82048e-06	0.07282	0.01573	1.55063
		0.000180987	1.71805	0.01163	2.62496
		0.00308	3.50866	0.0179	3.03878
		8.11125e-05	1.09661	0.05589	4.27991
		0.0033	4.47714	0.01818	2.45532
		0.000161953	1.56894	0.01458	1.1893
		0.000342952	2.24085	0.01191	2.53973
		5.41657e-06	0.20789	0.00942	2.25425
		0.00682	2.86169	0.00612	2.13152
		0.00254	6.44245	0.01239	3.29183
		0.00698	2.24281	0.00991	2.26484
		6.15465e-06	0.19974	0.01368	3.14924
		9.97716e-05	0.87657	0.06021	5.97784
		0.00226	6.0638	0.03533	2.85866
		0.000329148	2.31696	0.01084	2.7669
		0.00234	6.13348	0.00401	1.66228
		0.00301	1.6943	0.00625	2.13376
		2.95653e-05	0.19664	0.02423	2.66718
		0.00013942	0.79681	0.01815	1.07991
		0.00151	4.89092	0.01679	1.96215
		4.39366e-06	0.13389	0.00928	1.96025
		0.00164	5.05817	0.00825	2.46633
		0.00286	3.41301	0.02879	1.37227
		0.00138	1.33581	0.01264	2.31369
		0.000683761	2.33989	7.15772e-06	0.869
		0.01166	2.36661	0.00489	1.77136
		0.00453	3.29199	0.01219	3.04557
		0.00321	1.6134	0.01895	3.40253
		0.00185	5.32433	0.01686	3.35442
		0.00269	6.38236	0.01524	3.23398
		0.00364	1.55881	0.02307	3.74247
		0.00253	6.22789	0.01871	1.97469
		0.00221	1.28267	0.00743	2.19898
		0.00187	5.2862	0.01438	2.74873
		3.13619e-05	0.14381	0.01571	3.32527
		1.68379e-05	0.44045	0.01212	2.95707
		0.00318	3.12365	0.00628	1.95816
		0.00388	3.47144	0.02391	4.10265
		5.69929e-05	0.14144	0.0133	2.09277
		0.00282	4.88673	0.01285	3.04631
		0.00285	5.33996	0.01127	2.9223
		2.53617e-06	0.12229	0.00953	2.45327
		0.0061	3.42119	0.01966	3.05688
		0.0012	2.04046	0.01177	2.91402
		0.00189	1.78408	0.00333	1.53111
		0.00237	5.83543	0.01301	2.93429
		0.000148164	1.00664	0.01315	3.05423
		0.00398	4.26204	0.00202	2.16409
		2.02171e-05	0.20465	0.00651	1.9472
		4.2067e-05	0.60436	0.00108	0.73637
		0.00508	1.95265	0.00684	2.19086
		0.00129	4.26666	0.01211	2.97843
		0.00413	4.17973	0.00744	2.91437
		3.3368e-08	0.2764	0.00506	0.58812
		0.000432041	2.43585	0.06088	3.33844
		0.00622	2.99242	0.00424	1.32722
		0.000857442	3.39529	0.00559	2.13451
		0.00541	2.28294	0.00945	2.59045
		0.00582	2.83125	0.01719	2.3963
		0.00267	5.93082	0.00963	2.57313
		0.000355724	1.16753	0.01033	2.70822
		8.31829e-06	0.13406	0.00125	3.01317
		0.00034712	0.50775	0.01271	3.08389
		0.00429	4.39829	0.000906359	0.60397
		0.00479	4.154	0.06046	4.88603
		0.00192	4.95101	0.01075	2.77542
		0.00273	5.94691	0.02545	2.823
		0.00888	2.53153	0.0038	1.52457
		0.000275047	0.83129	0.000349855	0.53442
		0.00187	3.59786	0.0113	3.02515
		0.000315242	1.40753	0.00599	0.83029
		8.84804e-05	0.65162	4.06558e-05	2.03501
		5.56034e-07	0.41165	0.05917	4.0016
		0.00123	1.24568	0.01528	3.03041
		0.00256	5.70152	0.0126	1.47173
		0.00175	4.66505	0.01509	3.2733
		0.00156	4.41197	0.15287	6.41243
		0.00523	3.56569	0.01245	2.99602
		0.00214	5.15169	0.02288	1.54614
		0.00431	4.63846	0.01885	1.87722
		0.00684	2.73806	0.0111	2.83604
		0.00455	2.86656	0.09411	5.13958
		0.00234	3.62397	0.01592	3.6522
		0.00193	4.80782	0.0191	2.77534
		0.000288309	1.83931	0.02543	4.46761
		1.43453e-05	0.19173	0.00184	1.3388
		0.00866	2.53498	0.01072	2.59133
		0.00335	4.30995	0.01692	0.86308
		0.00275	5.73651	0.00135	0.96222
		0.00249	2.55775	0.00593	2.07327
		7.52091e-06	0.28838	0.00279	1.41876
		0.00257	5.4833	0.01363	3.14043
		0.000983254	0.9259	0.00574	2.06577
		0.00202	3.33439	0.0129	2.21173
		0.0059	3.56796	0.0136	3.15155
		0.00204	4.67928	0.00976	2.51998
		0.00296	5.77455	0.00141	2.47068
		0.000882318	3.04422	0.01752	2.30575
		0.00299	1.52408	0.00553	0.9776
		0.00213	4.74214	0.01526	2.92109
		1.83271e-05	0.11282	0.01639	2.434
		0.00229	4.86527	0.00632	2.09814
		1.03529e-05	0.27888	0.01318	2.68337
		0.00307	4.77299	0.00509	1.69216
		0.00328	1.51769	0.0055	1.99492
		0.00129	1.18904	0.01207	2.30099
		0.00435	2.8834	0.000306748	2.195
		0.000516658	2.26513	0.00852	2.44748
		0.000799337	2.41205	2.14568e-05	0.35924
		0.01009	2.66903	0.01662	2.62821
		0.00522	4.25337	0.0116	2.8911
		0.00157	3.05663	0.01118	2.84801
		0.00038844	0.5558	0.01655	3.41683
		1.64689e-06	0.07008	0.02145	1.72248
		0.00297	2.79542	0.01596	3.0803
		0.00268	5.25691	0.01206	3.13154
		0.00191	1.11706	0.00927	2.4626
		0.00287	5.27161	0.00356	1.22095
		0.000352417	0.52547	0.01343	3.12948
		0.0011	2.40205	0.0108	2.79992
		0.000262457	0.4788	0.0122	2.96537
		0.00371	4.39726	0.000874463	0.71341
		0.00034731	0.54129	0.01615	2.89034
		7.90359e-05	0.29748	0.00421	1.99642
		0.0028	5.10596	0.02063	3.54469
		0.00497	1.55076	0.00678	2.22322
		2.9479e-05	0.23249	0.01403	3.10365
		1.01271e-05	0.28265	0.02912	3.37263
		0.00369	3.76466	0.01207	2.35704
		0.000606643	1.58613	0.00864	1.70772
		0.00946	2.61035	0.01146	2.64926
		0.00226	4.29754	0.00625	2.05607
		0.000352743	0.49084	0.02023	0.70342
		0.00266	4.83964	0.01263	3.00736
		0.00309	5.16708	0.00519	2.37496
		0.000354213	1.68279	0.01515	2.12709
		0.00672	3.08828	0.01436	3.12614
		0.00749	3.29275	0.01506	3.03089
		0.00169	3.59305	0.0106	1.39084
		0.00668	2.28951	0.06787	4.33627
		0.00163	3.4188	0.00771	2.38878
		0.00176	3.83926	0.01176	2.90764
		0.00535	4.07795	0.01665	2.93246
		0.0002383	0.47066	0.01418	3.24317
		0.00451	3.32191	0.01451	2.19658
		0.00174	3.65152	0.00913	2.55122
		0.00325	4.99598	0.00389	1.79474
		0.000168881	1.1277	0.00721	0.86285
		0.00384	3.00403	0.01602	3.28442
		0.0027	4.70602	0.01394	3.16049
		0.00208	4.18035	0.01117	2.14276
		0.00295	4.78186	0.00258	2.00397
		0.000263772	1.44461	1.51867e-05	1.79582
		0.00405	3.07256	0.00948	3.09143
		0.00409	3.92649	0.01387	2.04876
		0.000573118	0.69985	0.07688	4.87643
		0.000211945	1.2656	0.02216	1.76685
		0.000263948	0.57658	0.00976	2.67144
		5.84328e-15	0.34732	0.00825	2.43819
		0.0019	3.23832	0.01243	2.92684
		4.69944e-05	0.25248	0.00133	0.97832
		0.00352	5.01194	0.0058	2.17915
		0.00146	3.02978	0.01275	2.4298
		0.00333	4.85836	0.01351	3.15682
		2.12756e-05	0.25306	0.01212	3.39775
		4.73988e-05	0.19974	0.01084	2.80513
		0.0112	2.57416	0.01364	1.57751
		0.00446	3.27063	0.08998	5.18858
		0.00244	4.07846	0.000169326	2.68352
		0.00034596	0.87079	0.03868	5.2741
		0.0002381	1.11581	0.00741	2.20856
		0.00367	2.28651	0.0136	2.57215
		0.00333	4.72987	0.0134	3.09734
		1.52139e-05	0.0907	0.0135	3.02121
		1.67473e-08	0.02491	0.00673	1.88676
		0.00502	4.273	0.0387	3.20994
		0.00451	4.70757	0.00833	2.72306
		0.000280333	0.67437	0.01528	2.24407
		0.00256	3.99753	0.00558	1.82018
		0.00119	2.63662	0.01504	2.69253
		2.56968e-06	0.04133	0.0132	2.49555
		0.00347	4.45981	0.00778	0.61278
		0.000533173	1.22143	0.12743	6.02778
		0.00297	3.33616	0.01254	2.34607
		0.000340784	1.13479	0.00195	1.1854
		0.00374	4.64296	1.12963e-05	2.40226
		3.1094e-05	0.13962	0.01049	2.73421
		0.00385	4.60684	0.01468	0.80528
		0.000346204	0.51211	0.02046	3.1368
		0.00229	3.55587	0.01	2.60499
		3.79395e-05	0.4404	0.02814	2.01948
		0.00412	4.76029	0.01306	3.0903
		0.0015	2.87017	0.01125	1.29283
		0.00377	4.25017	0.00975	2.62382
		0.000667239	1.78606	0.00778	2.43517
		0.00427	3.73139	0.00711	2.07761
		0.01134	2.33378	0.01882	3.03513
		0.00242	3.57178	0.00684	2.24053
		8.5458e-05	0.3911	0.00316	1.46122
		3.56214e-05	0.10914	0.01698	3.64989
		0.00308	3.93866	0.01372	2.48
		0.000536063	1.57139	0.01345	2.19155
		0.00112	2.20162	0.00968	2.66803
		4.05479e-05	0.24364	0.03392	4.33583
		0.00426	4.27861	0.01207	3.04921
		0.00175	2.82616	0.01283	3.01233
		0.00186	2.74833	0.05814	4.64662
		0.00507	4.54183	0.01469	2.94458
		0.00907	2.98713	0.01196	2.70768
		0.00201	2.94552	0.01702	2.07736
		0.00375	4.02165	0.01128	3.1904
		0.00506	4.49507	0.00779	1.06647
		0.000707156	1.6867	0.00364	1.25242
		0.00457	4.42545	0.01317	2.18623
		1.53522e-06	0.06991	0.00951	2.07907
		0.00668	3.58051	0.00793	2.39639
		0.00419	3.98716	0.00863	2.24344
		0.00327	3.3859	0.02211	2.52145
		6.69975e-05	0.12792	0.00991	2.70014
		2.10969e-05	0.15095	0.01751	2.42979
		0.00333	3.33212	0.01663	2.34632
		0.000347406	0.58742	0.02272	2.73911
		0.00453	3.75677	0.02282	0.97094
		0.00239	1.33356	0.0321	2.21604
		0.00423	1.99937	0.0065	2.71949
		0.00435	3.62912	0.01067	2.77721
		0.000119135	0.26201	0.07297	4.31645
		0.00453	3.61345	0.00944	2.58892
		0.00928	2.58364	0.02377	3.8249
		0.00411	3.27708	0.00367	1.53879
		0.00205	1.60613	0.01101	1.93012
		0.00582	3.91588	0.0089	2.42915
		0.00327	2.93475	0.01622	1.69159
		0.00345	2.83583	0.00881	1.79847
		0.00474	3.33982	0.0053	1.97448
		0.0024	1.58166	0.000416796	2.5008
		0.00257	1.21091	0.00389	1.69517
		5.04478e-05	0.29412	0.01032	2.60884
		0.00538	3.40614	0.00631	1.62255
		0.00587	3.13741	0.01876	2.87972
		0.00479	3.21082	0.000161657	3.19298
		0.00597	3.58142	0.01197	2.35657
		0.00205	1.24757	0.02327	2.18617
		0.000351156	1.35569	0.00664	2.1735
		0.00145	1.49444	0.01187	2.92534
		0.0064	3.49984	0.01363	2.43108
		0.00538	3.2161	0.00445	1.92322
		0.00328	2.33157	0.03237	3.42261
		0.00632	3.24129	0.00942	2.57253
		0.000346888	0.50078	0.11262	4.91419
		0.00771	1.91878	0.01234	3.0118
		0.00761	2.69685	0.01506	2.88118
		0.00546	2.10441	0.00266	1.37781
		0.00415	1.41515	0.00878	1.97294
		0.0062	2.44024	0.00959	2.36946
		0.00286	1.6849	0.01111	2.86744
		0.00646	1.97412	0.00495	1.89206
		0.00257	1.27691	0.01473	3.06943
		0.00809	3.12654	0.01381	3.15284
		0.0047	1.84546	0.01136	2.69733
		0.01291	2.42621	0.01506	2.39079
		0.0047	2.12538	0.0131	1.27185
		4.56545e-09	0.14525	0.05672	0.92218
		0.00248	1.37496	0.0104	1.07295
				0.03399	2.91456
				0.05044	5.52812
				0.00547	1.74003
				0.01051	2.80473
				0.01115	2.84348
				0.00989	0.83874
				0.000672984	1.23176
				0.01632	3.37775
				0.01108	2.14454
				0.00599	2.18433
				0.01352	3.19822
				0.02457	2.69541
				0.01305	3.07415
				0.01197	2.95783
				0.01976	1.10781
				0.04078	3.59372
				6.57323e-06	1.03002
				0.01647	2.67761
				0.02774	3.61767
				0.01326	2.96352
				0.01655	2.37914
				0.04861	3.8495
				0.01801	3.4894
				0.01157	3.08115
				0.00282	3.22552
				0.01396	3.14796
				0.00675	2.40472
				0.05442	2.63871
				0.01516	3.01673
				0.00882	2.87537
				0.01182	2.98218
				0.01318	3.24925
				0.02391	1.91971
				0.01829	3.0112
				0.00598	0.97092
				0.00289	1.40194
				0.01337	2.85766
				0.01689	2.58434
				0.00854	2.48529
				0.02178	3.19404
				0.02224	2.52236
				0.00536	0.85753
				0.01284	3.03574
				0.02388	1.60857
				1.03164e-05	2.42052
				0.01006	2.13036
				0.0851	4.76679
				0.00667	2.05174
				0.01185	2.92691
				0.01338	1.51025
				0.01329	3.32495
				0.01515	2.92393
				0.01041	2.51666
				1.89891e-08	1.00134
				0.00757	1.46028
				0.01396	3.28169
				0.01449	3.2316
				0.00972	1.19429
				0.02628	3.42704
				0.0131	2.39754
				0.01764	3.07998
				0.0212	2.66646
				0.02105	2.75893
				0.02512	0.82404
				0.00723	2.415
				0.00783	1.90635
				0.00171	1.57668
				0.02914	2.95276
				0.0097	2.62213
				0.0118	2.7054
				0.00895	2.558
				0.01701	2.97811
				0.00205	1.6811
				0.01199	1.82093
				0.04859	3.80119
				0.0054	2.23154
				0.00984	2.78777
				0.04177	5.46934
				0.0078	0.40965
				0.01721	3.07228
				0.00817	2.40103
				0.02728	1.90005
				0.01053	2.77636
				0.01462	3.47405
				0.00464	1.83384
				0.00676	2.53674
				0.00295	3.01591
				0.01204	3.08953
				0.01098	2.88439
				0.02982	3.15325
				0.02423	2.95092
				0.00742	3.09762
				0.0118	2.93344
				0.01523	3.31572
				0.0096	3.00895
				0.01005	2.6661
				0.01704	2.58995
				0.01552	2.71537
				0.0087	2.71962
				0.01428	2.52629
				0.01197	2.8773
				0.01583	1.59679
				0.01024	2.71481
				0.03844	2.61232
				0.01119	2.93999
				0.01382	2.85615
				0.01249	2.65041
				0.00942	0.37391
				0.0253	1.84061
				0.0173	2.20426
				0.00612	2.06921
				0.01001	2.70901
				0.0044	1.98928
				0.00712	2.22033
				0.01073	2.53658
				0.02098	1.93078
				0.01097	3.42843
				0.01485	2.66999
				0.00703	2.23184
				0.00242	1.31115
				0.01235	3.01693
				0.01086	2.80735
				0.0011	0.90302
				0.02395	3.18925
				0.01644	3.4459
				0.01035	2.76866
				0.01946	2.38553
				0.01599	2.33116
				0.01039	2.58874
				0.01292	2.83522
				0.00913	2.80221
				0.01093	2.65482
				0.0084	2.85784
				0.02586	2.1897
				0.01917	2.11332
				0.01088	2.77628
				0.01135	2.74149
				0.01161	2.91308
				0.000843617	2.55755
				0.01835	2.8311
				0.01393	2.9174
				0.01528	3.4572
				0.03953	4.44997
				0.01033	2.19758
				0.01555	2.49203
				0.02018	3.81411
				0.01238	3.2896
				0.01243	2.97275
				0.00399	1.30098
				0.01496	2.94619
				0.0176	2.70609
