# Supplementary material for: Cell crowding activates pro-invasive mechanotransduction pathway in high-grade DCIS via TRPV4 inhibition and cell volume reduction
Source: eLife. 2025 Apr 21;13:RP100490. doi: 10.7554/eLife.100490 (PMC12011371; doi:10.7554/eLife.100490)
Supplement: Figure 6—source data 3. [file elife-100490-fig6-data3.xlsx]

## Sheet: Sheet1
Numerical data for Figure 6E - for % PM TRPV4 comparisons in MCF10AT1 cells
AT1 ND CTRL	AT1 ND GSK1	AT1 ND GSK2	AT1 ND PEG	AT1 CON CTRL
3.04483	4.80093	3.84634	2.97821	9.02191
2.14129	8.06808	5.53848	2.58644	8.14635
4.06012	9.5202	14.8344	5.15268	12.5822
21.2405	6.34518	7.85796	4.58308	2.7129
18.3001	4.74509	9.01068	5.64495	15.4598
8.07428	6.76579	11.7707	1.68034	7.17183
6.03703	2.35246	6.52512	6.26453	19.7481
13.2736	1.6505	8.39269	5.43453
4.1948	9.2716		6.27759
10.3266
4.74512
