# Supplementary material for: Cell crowding activates pro-invasive mechanotransduction pathway in high-grade DCIS via TRPV4 inhibition and cell volume reduction
Source: eLife. 2025 Apr 21;13:RP100490. doi: 10.7554/eLife.100490 (PMC12011371; doi:10.7554/eLife.100490)
Supplement: Figure 6—source data 4. [file elife-100490-fig6-data4.xlsx]

## Sheet: Sheet1
Numerical data for Figure 6F - for D and v values of single MCF10AT1 cells
ctrl-D	ctrl-v	gsk1-D	gsk1-v	gsk2-D	gsk2-v	peg-D	peg-v
0.00557	1.99524	0.01739	2.80556	0.00164	6.8351	0.01291	3.03901
0.00522	1.94233	0.01254	3.01159	0.0016	6.75631	0.01392	3.17072
0.01064	2.75346	0.01124	2.83699	0.000164875	2.12698	0.01739	3.53126
0.00341	1.57485	0.01108	2.82679	0.000900757	4.68582	0.0266	4.37937
0.02295	2.29369	0.01257	2.99661	0.000751552	4.5801	0.01754	3.52363
0.000356166	0.51254	0.01692	3.4898	0.000770163	4.68558	0.00986	2.68079
0.0184	1.43495	0.00753	2.34479	0.00172	6.99272	0.01092	2.80693
0.00209	1.01584	0.00795	2.37479	0.00165	6.84999	0.01026	2.20707
0.01406	3.17305	0.00629	1.60159	4.03955e-06	0.0747	0.01173	2.90902
0.0086	2.49022	0.01435	3.23557	0.00094554	5.19545	0.01262	2.53006
0.01179	2.20549	0.00933	2.59681	0.00336	3.23462	0.00934	2.59513
0.00030491	1.13587	0.01145	2.85717	0.00175	7.05937	0.01698	2.26779
0.08448	5.07597	0.01239	2.98344	5.60827e-06	0.13536	0.00149	1.05324
0.01328	3.51458	0.00773	2.35397	0.00179	7.14288	0.01131	2.84825
0.00851	2.47107	0.0016	1.08528	0.00549	3.91713	0.01034	2.72917
0.01101	2.666	0.01108	2.82543	0.000246219	2.64597	4.94396e-07	2.33113
0.01417	3.17206	0.01112	2.83397	0.000979471	5.28717	0.01146	2.85495
0.00984	2.68838	0.01366	3.14261	5.19852e-14	0.05486	0.0028	1.4213
0.01416	3.19466	0.00613	2.10445	0.000807354	4.79817	0.01159	2.89593
0.01234	2.99096	0.01109	2.82839	3.36496e-06	0.07546	0.01092	2.80501
0.00921	2.57998	0.04045	5.39362	0.00288	3.77512	0.03561	5.05539
0.00736	2.26641	0.01347	3.12959	0.0012	5.84247	0.0091	2.56906
0.00933	2.23972	0.00587	2.04085	0.00339	5.02043	0.01111	2.92373
0.01139	2.86445	0.01204	2.94775	0.00361	2.30213	0.02211	3.96157
0.01145	2.87496	0.01214	2.94656	0.00324	5.06015	0.0153	3.30967
0.01331	3.10124	0.01272	3.03526	0.00124	5.94154	0.00982	2.65108
0.01031	2.72446	0.01034	2.83911	0.000814219	3.44783	0.01008	2.69647
0.0121	2.95597	0.0052	1.93245	0.00137	6.25053	0.000357924	0.56514
0.00666	2.0227	0.0122	2.95586	0.000885076	5.02373	0.00744	2.32499
0.00733	2.30263	0.01147	2.6016	0.00268	3.1309	0.01413	3.04786
0.01275	3.01612	0.00969	2.60515	0.000733575	4.5753	0.00416	1.69807
0.01125	2.55399	0.01227	2.97259	0.000997076	5.33457	0.01239	2.99733
0.00615	2.10683	0.00502	1.76634	0.000250669	1.08857	0.00821	2.43513
0.0105	2.75392	0.01266	3.02495	0.000875009	4.99749	0.02772	4.48323
0.00558	1.74682	0.00782	2.37082	0.00171	6.97941	0.01138	2.84423
0.01172	2.90786	0.01285	2.92364	0.00144	6.42191	0.0084	3.05606
0.02375	4.12836	0.01172	2.83403	0.00116	5.75844	0.01296	3.06476
0.00476	1.83116	0.01105	2.82138	0.000748208	3.59248	0.000652214	0.72458
0.00872	1.71853	0.01155	2.87024	0.00154	6.6371	0.01003	2.68488
0.01648	3.37157	0.0019	1.14966	0.00161	6.77443	0.00622	2.12719
0.0161	0.871	0.01429	1.41318	0.00104	5.44318	0.01807	3.61725
0.00871	2.50822	0.0095	2.24403	0.00164	2.94163	0.01077	2.78745
0.01879	2.23659	0.00711	2.24393	0.00201	6.47349	0.02058	4.4058
0.01232	2.95867	0.01073	2.78514	0.00173	7.03109	0.00898	2.52914
0.0162	3.39412	0.00804	2.60954	0.00173	7.02831	0.01184	2.92954
0.01417	3.20163	0.02451	3.51617	0.00232	5.48656	0.05326	4.25467
0.00977	3.3688	0.00481	0.99316	0.00458	4.44478	0.00797	2.39399
0.01135	2.59544	0.01081	2.7893	5.58742e-06	0.39377	0.000421016	0.603
0.01561	3.11172	0.00194	1.19867	0.00161	6.75976	0.00178	1.21169
0.00169	0.95625	0.01135	2.84913	0.00131	6.12007	0.0067	2.19218
0.0109	2.53862	0.01406	3.06867	0.00167	6.89774	0.00745	2.31799
0.00915	2.59105	0.0151	3.29041	0.00115	5.74187	0.01215	2.94806
6.78137e-06	0.22747	0.00537	1.97247	0.00284	4.12589	0.01729	3.51494
0.01074	2.78474	0.01591	1.69154	0.00179	7.14455	0.01867	3.16486
0.01352	3.1199	0.00599	2.02969	0.00159	6.73506	0.01291	3.05133
0.00764	2.34224	0.00908	2.38912	0.00165	6.85551	0.00642	2.12751
0.00669	2.19749	0.00918	2.5923	0.00738	2.2154	0.01325	3.06081
0.01354	3.1296	0.00993	2.67722	0.00125	5.97738	0.00619	2.14544
0.00747	2.31951	0.0189	1.78355	0.00141	6.33839	0.01285	2.87927
0.00774	2.35863	0.01183	2.90635	0.00161	6.78582	0.01699	3.53319
0.02495	2.97022	0.01693	2.70266	0.00277	5.09552	0.01218	2.95886
0.02615	1.91785	0.0234	2.45944	0.00496	4.49543	0.00348	1.58754
0.01452	2.45935	0.02568	4.30165	7.0698e-06	0.11489	0.01882	3.68574
0.01262	3.01723	0.00706	2.26197	0.00157	6.68872	0.00834	2.45513
0.01049	2.64817	0.00661	2.1891	0.00309	4.63932	0.0309	3.62354
0.00806	2.40975	0.00681	2.24449	0.0011	5.59914	0.01134	2.85937
0.01063	2.75101	0.01739	3.55579	0.000536817	3.82961	0.02361	2.96941
0.01144	2.86112	0.01387	3.1613	0.00209	4.67982	0.01914	2.82442
0.01069	2.77424	0.02685	3.41848	0.000495738	3.74615	0.01565	3.36358
0.01117	2.83743	0.01186	2.92741	0.00182	7.21476	0.00391	1.68011
0.00141	0.93312	0.0055	1.9962	0.00173	7.03137	0.0124	3.00817
0.01206	2.94535	0.00845	2.44957	0.00173	7.02541	0.00464	1.8043
0.01322	3.07491	0.01554	2.95501	0.00155	6.65197	0.02179	3.96682
0.00643	2.02158	0.01009	2.84035	0.000962617	5.23969	0.03185	3.32043
0.02066	3.26573	0.01523	3.28367	0.000882067	5.01908	0.01176	1.38421
0.0135	3.0019	0.00648	2.15458	6.17412e-06	0.14159	0.00997	2.66311
0.0133	3.05751	0.01335	3.11042	0.00136	6.23412	0.00549	1.98898
0.00263	1.33849	0.00953	2.54257	0.00148	6.31065	0.00415	1.72031
0.01496	2.36462	0.00637	1.85792	0.000780248	4.71936	0.0257	3.63732
0.000854949	2.20116	0.01333	3.09976	0.00168	6.91711	0.02436	4.18505
0.01005	1.83049	0.00431	1.46717	0.00176	7.05682	0.01784	2.04631
0.0052	2.18142	0.00271	1.20912	0.00326	3.13214	0.00709	2.12835
0.00986	2.68661	0.00939	2.469	0.00494	4.20264	0.01235	2.85901
0.0114	2.58841	0.02093	3.0514	0.000690503	4.44061	0.01594	3.39364
0.00251	1.30214	0.01531	2.45128	0.00115	5.72083	0.01522	3.31427
0.00454	1.81662	0.01719	3.05097	0.0033	4.67768	0.00709	2.29516
0.00374	1.63997	0.01112	2.83157	0.000271119	2.51161	0.12482	6.01238
0.00574	2.01555	0.01815	3.03515	1.86053e-05	0.18169	0.00898	1.62655
0.00995	2.62526	0.01069	2.77106	0.00116	5.75566	0.01236	2.8854
0.01763	3.10187	0.02017	3.78363	0.00149	6.509	0.02516	3.59856
0.03322	5.21341	0.0053	1.95415	0.00134	6.18755	0.0091	2.56477
0.017	3.50947	0.00941	2.88774	0.000416297	3.42185	0.00162	0.81306
0.00192	1.20308	0.00452	1.788	0.00131	6.10644	0.01863	3.56946
0.00821	1.66682	0.01501	2.73218	0.00116	5.68255	0.01783	3.134
0.0092	2.55852	0.00619	2.0993	1.27075e-05	0.13035	0.01054	3.27146
0.00293	1.46548	0.01041	2.73714	0.00175	7.06029	0.01319	3.05668
0.00953	2.6149	0.01422	2.79473	9.99677e-05	1.67655	0.01155	2.89349
0.01196	2.92106	0.00632	2.11688	0.000888698	5.03752	0.02249	4.56687
0.01071	2.77283	0.01353	2.44827	0.00188	6.60554	0.01366	2.30901
0.00956	2.62669	0.00456	1.82555	0.00048137	3.54632	0.01098	2.82375
0.00529	1.93052	0.01004	3.47004	1.732e-05	0.34536	0.01629	3.41566
0.0106	2.77003	0.01262	3.01443	0.000720249	4.53198	0.01765	2.00603
0.0103	2.73045	0.01112	2.81	0.00121	5.8545	0.01304	3.07657
0.00619	2.11377	0.0106	2.7618	0.000868555	4.97533	0.00663	2.16996
0.01004	2.66753	0.01207	2.92614	0.000583745	4.08172	0.0475	3.78747
0.01078	2.79755	0.00578	2.04667	0.00259	3.92049	0.01018	1.32483
0.01079	2.79144	0.00853	2.30837	2.54395e-06	0.25219	0.01016	1.19958
0.00656	2.14539	0.01111	2.82147	0.00109	5.36758	0.01042	2.7306
0.01647	3.03287	0.01443	2.74178	0.00174	7.04722	0.00212	2.93513
0.01069	2.73995	0.01648	3.40583	4.45006e-05	0.51804	0.00273	1.428
0.01108	2.80363	0.00885	0.997	0.00253	6.69286	0.00749	2.27289
0.00899	2.84543	0.01156	3.36598	0.00166	6.87729	0.0026	1.36474
0.02074	3.88224	0.000537694	0.58514	0.00167	6.90304	0.00379	1.65727
0.0125	3.11473	0.02016	2.81231	0.00159	6.74752	0.000475339	0.56413
0.01477	2.55132	0.01244	2.85822	0.00258	4.71652	0.00582	2.06763
0.01436	3.19996	0.01435	2.61967	0.00137	6.25194	0.0128	2.87378
0.00224	1.27443	0.00587	2.04108	6.02734e-06	0.08817	0.02833	4.52477
0.00941	2.40642	0.01197	4.02752	0.000568332	4.0244	0.00562	3.48636
0.01559	3.07419	0.01088	2.79794	0.000399387	0.52984	0.10498	6.37436
0.0167	2.93853	0.0083	2.47264	0.01055	2.57805	0.01198	1.30364
0.00957	2.30144	0.01955	3.25075	0.00135	5.60047	0.00987	2.676
0.01166	2.89361	0.00373	1.52268	0.00361	2.46073	0.01302	3.05924
0.01253	3.00415	0.00654	2.18086	0.00176	7.08672	0.00685	2.16389
0.01979	3.77273	0.00513	1.91936	0.000227027	2.54628	0.00047313	0.5809
0.01693	3.00604	0.00777	2.2534	0.00162	6.80487	0.00999	2.68437
0.02613	3.83088	0.01155	2.89184	0.00176	7.08819	0.00659	2.17157
0.0023	1.30112	0.0084	2.43353	3.0863e-06	0.09405	0.0633	4.07738
0.00696	2.23291	0.01295	2.54407	0.000451787	3.38495	0.00137	0.96097
0.01334	2.922	0.00256	1.22187	0.00153	6.61142	0.01295	3.90688
0.01046	3.23279	0.00843	2.07201	0.00142	5.49131	0.00577	2.03773
		0.01391	3.10866	2.12156e-06	0.10603	0.0074	2.32025
		0.01353	3.16624	0.00139	6.29034	0.00291	1.34629
		0.01125	2.74067	0.00165	6.82462	0.03094	3.9726
		0.0066	2.18117	0.00126	5.99281	0.00415	2.44057
		0.00692	2.2301	0.000538888	0.59659	0.01452	3.21966
		0.02703	4.41992	0.00102	5.39219	0.00536	1.97344
		0.01327	3.08827	0.000592473	4.11347	0.00835	2.43431
		0.00594	2.07354	0.000838248	4.86821	0.01226	2.91783
		0.04888	5.92661	0.00174	7.04609	0.01173	2.09155
		0.00429	1.77491	0.00157	6.6894	1.0464e-09	1.41872
		0.01069	2.78455	0.000173196	1.69753	0.02331	4.24805
		0.01176	2.90899	0.00624	2.73586	0.01035	3.61508
		0.01641	3.19975	0.00155	6.64682	0.01009	2.67064
		0.00633	2.10733	0.00546	2.9025	0.00753	3.5052
		0.00402	1.70263	0.0034	5.1111	0.00022382	2.35265
		0.00808	3.11106	0.00163	6.81395	0.00262	1.39569
		0.00179	1.07687	0.000660669	4.33592	0.01171	3.36913
		0.01621	3.4147	0.00242	6.03549	0.14016	6.04298
		0.00348	1.64482	0.00143	6.39124	0.00897	2.54184
		0.00932	2.59008	0.00337	4.56084	0.01244	3.01316
		0.0104	2.74006	0.00175	7.0181	0.01709	3.49048
		0.01297	3.05113	0.00164	6.833	0.01229	2.92654
		0.0123	3.61818	0.02136	2.07888	0.02009	3.80583
		0.02805	4.41145	0.00128	6.00886	0.02397	1.14965
		0.00938	2.59958	9.29075e-07	0.08894	0.00615	2.00985
		0.01145	2.79139	0.000647145	4.27638	0.000158888	0.37628
		0.0057	1.98343	5.27215e-06	0.10166	0.01288	3.05216
		0.00785	2.72892	0.00368	1.61793	0.01451	3.03372
		0.01296	3.05629	0.00394	4.4224	0.00665	2.18777
		0.00521	0.67406	8.92789e-13	0.10492	0.0213	4.01251
		0.00674	3.04764	1.29516e-05	0.18615	0.00804	2.3532
				1.47588e-06	0.09786	0.00819	2.43451
				1.99773e-06	0.11986	0.02328	4.08781
				0.00174	7.03256	0.01205	2.97143
				0.00173	6.44321	0.000645807	0.72065
				0.00244	3.74728	0.00703	2.75255
				5.57114e-15	0.03616	0.00749	2.3079
				9.81499e-06	0.20327	0.01645	2.85252
				0.00162	6.79099	0.00838	2.44709
				0.000627312	4.23046	0.01001	2.71131
				4.39571e-06	0.20576	0.01752	2.45503
				1.34642e-05	0.35293	0.03766	4.53104
				0.000506429	3.80302	0.00108	3.06871
				0.000174463	2.23141	0.00299	1.46632
				0.00158	6.72753	0.01131	2.85789
				0.00387	3.19402	0.0076	2.32712
				0.00172	6.9956	0.01298	3.04738
				0.000650048	0.7351	0.03637	2.58849
				0.00344	3.27339	0.01389	3.16066
				0.00144	5.19926	0.00652	2.17506
				0.00149	6.51849	0.01299	3.05904
				0.00123	4.69758	0.01211	2.96869
				0.00296	4.20353	0.02835	3.49758
				0.00196	4.947	0.03231	2.35657
				0.00181	7.18282	0.01127	2.81614
				0.0015	6.54848	0.0144	3.4221
				3.95102e-05	0.5511	0.00194	1.22977
				0.00891	2.20556	0.01637	2.95378
				0.00122	5.9083	0.01007	2.97717
				0.0026	4.10071	0.01045	3.39333
				0.00395	1.69481	0.01839	2.60516
				0.00162	6.79109	0.00433	1.66373
				0.00114	5.67949	0.00871	2.49387
				0.00113	2.19004	0.01311	3.2531
				2.6503e-05	0.45737	0.006	2.09628
				0.000133308	0.12687	0.01996	2.92
				0.00111	5.62789	0.02334	4.10506
				0.000471473	0.5791	0.01104	2.82136
				0.00173	7.02695	0.01144	2.54893
				2.47901e-06	0.21657	0.01305	1.01107
				0.00165	6.86169	1.69533e-06	1.58789
				0.000555266	3.97973	0.00728	2.19536
				0.00149	6.50939	0.00859	2.49783
				5.56642e-15	0.0422	0.01133	2.84732
				0.00205	3.8385	0.0083	2.12121
				0.01083	2.27983	0.00457	1.82162
				0.00123	5.93377	0.01707	3.51736
				0.00166	6.87285	0.00458	1.81165
				0.00134	6.18086	0.0167	2.45917
				0.00118	5.79679
				2.30009e-05	0.13098
				2.37446e-05	0.15276
				3.69094e-05	0.24885
				3.10336e-06	0.06636
				0.0081	3.74839
				0.00695	3.16107
				0.00695	3.41752
				1.07809e-05	0.12957
				1.95384e-05	0.59658
				0.00553	4.14772
				0.000440827	3.48431
				1.49071e-06	0.13355
				5.75634e-07	0.06511
				0.00313	3.10524
				0.000608557	0.64328
				0.000589622	4.0408
				0.000331662	1.5216
				1.51382e-05	0.0441
				1.00659e-06	0.05848
				0.00104	0.9808
				0.000647408	0.55769
				6.84973e-05	0.27953
				1.76023e-05	0.20359
				0.00219	5.06246
				0.000813292	4.67241
				0.00172	1.33688
				6.49338e-06	0.12
				1.24941e-08	1.59596
				0.00108	5.3909
				2.27374e-07	0.07824
				0.00232	0.52385
				4.82031e-07	0.03323
				7.13872e-05	0.19197
				0.000281471	2.50681
				0.00463	2.93673
				0.000230309	2.46172
				0.00176	6.78377
				0.000347576	0.51204
				0.00137	6.04406
				0.00448	2.31906
				0.0014	6.05474
				2.96842e-07	0.03728
				2.05343e-05	0.1971
				0.00146	6.11765
				0.00361	3.88367
				9.84978e-06	0.10699
				0.00621	2.1088
				9.04318e-05	0.14115
				2.77148e-05	0.14821
				4.04331e-05	0.16936
				0.00153	6.10651
				0.000829851	4.49712
				0.00101	0.85401
				4.9312e-06	0.05043
				0.000106434	0.27176
				0.000106611	1.52273
				0.00656	2.50868
				0.00315	1.73672
				5.55289e-15	0.06785
				0.00205	6.19345
				0.000104368	4.12574
				9.89603e-06	0.30222
				2.91741e-05	0.10413
				0.01033	2.22644
				1.30564e-06	0.1523
				0.000162148	0.26732
				0.01047	5.62791
				0.000234658	0.89648
				5.91804e-06	0.16449
				0.00271	2.53897
				5.55205e-15	0.08836
				1.00704e-13	0.07136
				0.00325	1.87341
				0.00698	3.42453
				1.69438e-05	0.45269
				6.62334e-06	0.04651
				7.05214e-06	0.191
				0.00282	5.58136
				0.0048	3.55302
				0.00542	1.97329
				0.00202	6.70298
				0.00192	5.06786
				0.000279108	0.82624
				0.00305	5.5653
				0.00832	3.15737
				0.0022	4.04688
				1.83807e-05	0.18793
				0.00918	2.09964
				0.00983	2.65776
				8.24993e-05	0.53279
				0.01482	1.95135
				0.00333	4.81421
				0.00583	2.89558
				0.00216	6.81107
				0.00145	5.58868
				0.00135	5.34896
				0.01	2.68351
				0.00611	3.60523
				7.33341e-06	0.27526
				7.97639e-06	0.09416
				6.86877e-05	1.1517
				2.84877e-06	0.00735
				0.000329192	0.89914
				0.000601748	3.527
				0.00649	3.48728
				4.50121e-13	0.20107
				7.35526e-05	0.0822
				0.00209	3.74223
				0.01046	2.41231
				9.12574e-05	0.13184
				4.73991e-06	0.19211
				0.00152	4.31801
				0.000147172	0.34244
				0.00222	6.73088
				9.46309e-05	0.22091
				0.000414626	3.59602
				0.00512	1.98181
				1.09991e-06	0.07111
				7.7674e-06	0.13023
				1.17902e-06	0.10976
				0.01599	3.20104
				4.48179e-09	0.05227
				2.9725e-05	0.12276
				0.00494	3.26423
				0.00643	2.6229
				0.00615	2.27193
				0.00887	1.62455
				2.26071e-06	0.18366
				0.00444	3.99042
				0.000161751	1.24191
				0.00683	3.13603
				1.25359e-05	0.42413
				0.00108	1.51835
				0.00181	5.73431
				2.11574e-06	0.05071
				0.000103093	0.29492
				4.3217e-06	0.21523
				0.000817004	0.75113
				9.81095e-09	0.12874
				0.000295919	1.73643
				0.00402	3.45485
				0.00216	6.06457
				5.33056e-07	0.08832
				0.00318	1.74637
				0.00182	5.56863
				5.6945e-05	0.69516
				5.99963e-05	0.48909
				4.37473e-06	0.05901
				0.02362	4.22578
				7.79938e-05	1.08622
				1.37426e-06	0.04643
				0.00548	1.98776
				0.00452	1.79945
				1.07081e-06	0.03435
				0.00179	5.29024
				0.00195	5.4762
				0.000346433	0.52408
				0.00232	5.97259
				3.55866e-05	0.50747
				0.000169464	1.17204
				1.86811e-06	0.04776
				0.0113	2.32313
				0.00466	2.09883
				0.00036096	3.63883
				0.00319	1.75029
				0.00232	4.06639
				0.00387	2.53937
				0.00725	3.00969
				0.000166722	0.36115
				0.00894	2.53874
				5.59433e-06	0.16189
				0.0083	3.65658
				0.00765	1.91214
				0.00161	4.8056
				3.02236e-06	0.0704
				0.00262	1.85787
				0.00468	2.01882
				0.00188	3.07663
				3.42587e-05	0.17174
				1.80226e-05	0.12912
				0.00187	5.13567
				0.00321	2.93096
				3.13354e-05	0.11734
				0.00217	4.01372
				1.9207e-05	0.04251
				7.80137e-12	2.43615
				0.00389	2.36144
				0.00184	5.01267
				5.40492e-05	0.16678
				0.00266	3.08823
				0.000382899	1.49926
				8.85588e-06	0.09347
				0.00232	5.52985
				2.88131e-06	0.12487
				0.00259	5.84182
				0.00309	2.65381
				0.0051	2.61008
				0.00116	3.34821
				0.00724	1.86303
				0.00178	1.12042
				4.405e-05	0.17537
				5.93842e-06	0.08656
				0.00156	4.18048
				0.01012	2.69954
				0.000376583	1.90951
				0.00348	5.08906
				0.01024	2.22069
				0.00253	5.37614
				0.00358	2.32936
				0.00689	2.80256
				0.000428338	0.56178
				0.00243	2.02156
				0.00115	3.31158
				0.00555	3.64851
				0.00485	2.81042
				0.00736	2.30321
				0.0052	2.89291
				0.0062	3.65901
				9.24523e-09	0.07495
				0.000995226	3.20424
				0.00455	1.47622
				0.00479	2.38759
				2.6107e-05	0.11682
				0.00603	3.18163
				0.00287	4.97795
				0.00194	4.15246
				0.00425	3.90827
				0.00441	2.12736
				0.00363	1.60452
				0.00183	4.13582
				0.00042436	2.78561
				7.1629e-11	0.37272
				2.56136e-05	0.1874
				0.000633862	0.65218
				0.00547	3.74089
				9.37773e-06	0.07091
				0.000346852	0.50457
				0.00299	5.22252
				5.55225e-15	0.11151
				0.0058	3.10382
				5.69098e-05	0.215
				0.00366	3.27518
				0.00201	3.99181
				0.00266	3.98226
				8.71175e-05	0.2802
				0.0036	3.21907
				0.000371954	1.05677
				0.00109	0.9615
				5.84328e-15	1.15795
				0.00309	4.93638
				0.00244	4.32204
				5.80678e-05	0.64632
				0.00265	2.76335
				0.01216	2.41491
				7.82038e-05	0.22821
				1.72452e-05	0.18126
				0.00391	1.36449
				2.05181e-05	0.14101
				4.60537e-06	0.06952
				0.00275	4.43999
				0.00309	4.62845
				0.00223	3.9153
				0.00229	3.91426
				6.46449e-09	0.11844
				0.002	3.60296
				0.000315035	0.37894
				0.000491861	0.59277
				0.00179	2.26459
				0.00468	2.1177
				0.00732	3.10535
				0.00378	4.85699
				0.00256	3.91537
				0.0087	2.04704
				0.00275	3.50943
				0.00332	4.44256
				0.01473	3.22438
				2.08378e-06	0.01274
				0.00212	3.55902
				0.00494	2.867
				7.98214e-06	0.19079
				0.00247	3.76887
				0.00362	3.60687
				0.00352	4.35632
				0.0011	1.9206
				0.00873	2.12474
				5.51649e-06	0.04468
				0.00147	2.31014
				0.00424	4.72827
				0.01516	3.06686
				0.00036486	2.12055
				0.00412	4.63048
				0.01102	2.2993
				0.0021	1.87653
				0.00149	2.75459
				0.00475	4.55116
				0.00391	4.04215
				0.00364	3.93494
				0.00362	4.04927
				0.00381	4.16909
				0.00224	3.197
				0.00266	3.19796
				0.00686	2.44054
				2.56525e-05	0.24602
				0.00332	3.2798
				0.00339	3.44854
				0.00505	4.25964
				3.42804e-06	0.34126
				0.00518	2.24568
				0.00323	3.29873
				0.0103	2.22311
				0.0083	1.98776
				0.000186864	0.37225
				3.0779e-05	0.122
				0.00516	2.88732
				0.01532	3.43053
				0.00663	3.33578
				0.00291	2.23839
				0.00518	1.92795
				0.00552	4.14825
				0.00529	4.21492
				0.00346	3.11621
				0.0057	4.01003
				0.00415	3.11295
				0.00107	1.75063
				0.00219	1.91808
				1.05668e-14	0.28437
				5.05564e-08	0.12199
				6.62075e-06	0.09601
				0.00348	2.67987
				0.00782	2.7381
				0.01458	2.25149
				3.56589e-08	0.09521
				0.0101	2.19489
				0.01001	2.1913
				0.00212	0.99225
				0.00588	3.3381
				0.00765	1.91605
				0.00638	2.625
				0.00812	1.97126
				0.00416	1.40662
				0.00659	2.98852
				0.00768	3.31599
				4.31065e-07	3.4288
				0.0041	2.41925
				0.00351	2.241
				0.00327	1.66514
				0.00804	3.07456
				0.00676	3.12102
				0.00454	2.28751
				0.01036	2.22966
				0.00786	2.74432
				0.00819	1.90975
				0.00034554	0.53343
				0.00405	2.20139
				0.00521	2.49653
				0.00599	2.09873
				0.00189	1.4935
				0.00853	2.78675
				3.0835e-06	0.62208
				0.00455	2.0885
				0.00585	2.3947
				3.82013e-06	0.08528
				0.00844	2.0119
				0.00935	2.11855
				0.00811	1.97396
				0.00963	2.18817
				0.00536	1.95621
				0.01524	2.03307
				0.01051	2.74704
				0.01084	2.78324
				0.0103	2.7206
				0.00923	2.5767
