# Supplementary material for: Cell crowding activates pro-invasive mechanotransduction pathway in high-grade DCIS via TRPV4 inhibition and cell volume reduction
Source: eLife. 2025 Apr 21;13:RP100490. doi: 10.7554/eLife.100490 (PMC12011371; doi:10.7554/eLife.100490)
Supplement: Figure 6—source data 5. [file elife-100490-fig6-data5.xlsx]

## Sheet: Sheet1
Numerical data for Figure 6H - for % PM TRPV4 comparisons in MDA-MB-231 cells
231ctrl	231gsk1	231gsk2v	231pegD	231Con
13.8609	8.28729	5.40906	18.9189	48.5
11.0368	4.67836	6.11621	15.2763	19.8
6.19074	3.81211	9.80861	6.21139	14.7
3.6541	0.512821	0.309119	5.63429	4.7
2.51419	3.44828	8.48861	12.0567	39.2
4.62351	8.99471	16.2055	17.5299	5.2
13.9489		0.923788	3.10559	8.6
15.6379		2.39808	4.22535	3.4
		5.41612	3.61664	15.6
			8.1761	18.7
