# Supplementary material for: Cell crowding activates pro-invasive mechanotransduction pathway in high-grade DCIS via TRPV4 inhibition and cell volume reduction
Source: eLife. 2025 Apr 21;13:RP100490. doi: 10.7554/eLife.100490 (PMC12011371; doi:10.7554/eLife.100490)
Supplement: Figure 6—source data 6. [file elife-100490-fig6-data6.xlsx]

## Sheet: Sheet1
Numerical data for Figure 6I - for D and v values of single Mda-MB-231 cells
ctrl-D	ctrl-v	gsk1-D	gsk1-v	gsk2-D	gsk2-v	peg-D	peg-v
0.0127	3.0263	0.0112	2.8286	0.0113	2.8565	0.01699	2.98211
0.013	3.0363	0.0134	3.1079	0.0125	2.9955	0.00206	1.41452
0.0091	2.55	0.0091	2.5628	0.0095	3.0979	0.02559	2.94288
0.0126	3.0121	0.0116	2.8819	0.0089	2.5262	0.13104	5.69303
0.0019	1.1592	0.006	2.0757	0.01	2.677	0.01198	2.23844
0.0117	2.8618	0.0111	2.8324	0.0068	2.2173	0.00948	2.50986
0.012	2.9418			0.0123	2.9774	0.01369	3.08118
0.0124	2.9843			0.0117	2.8896	0.000129012	0.19131
0.0431	5.5606			0.0119	2.9215	0.0122	3.03228
0.0133	3.0946			0.0102	2.6992	0.0231	3.1609
0.0115	2.886			0.0036	1.5863	0.01251	3.01232
0.0051	1.9125			0.0055	1.9823	0.01504	2.49483
0.0078	2.3657			0.0054	1.9718	0.00516	1.90047
0.0184	2.6521			0.0091	2.5399	0.0163	2.99571
0.0039	1.6895			0.0116	2.9077	0.01209	2.95718
0.0057	2.0253			0.0056	2.0034	0.01411	2.45675
0.0121	2.8507			0.009	2.5478	0.00554	1.60024
0.0115	2.883			0.0114	2.8375	0.28403	8.39891
0.0107	2.7221			0.0119	2.8843	0.01245	1.09054
0.01	2.6774			0.0131	3.0741	0.03822	2.83682
0.0162	3.4132			0.0106	2.7658	0.01387	3.08547
0.0062	2.1101					0.01266	3.61903
0.012	2.9377					0.00901	2.84243
0.0117	2.8988					0.01353	1.15088
0.0065	2.1697					0.02851	1.89299
0.0048	1.8711					0.01197	2.82477
0.0059	2.0581					0.01121	2.51673
0.0049	1.8865					0.01319	2.20884
0.0176	3.556					4.24113e-07	2.02326
0.0015	1.0178					0.01498	3.30552
0.0037	1.5707					0.03104	4.0058
0.0088	2.512					0.0079	0.24516
0.005	1.8828					0.00899	2.5657
0.0031	1.4957					0.00583	2.16056
0.0114	2.8534					0.01242	2.95122
0.0213	3.9175					6.91274e-05	1.32916
0.0097	2.6417					0.01321	2.97117
0.0096	2.6146					0.01153	2.8814
0.0068	2.1906					0.01354	3.00332
0.0199	3.0066					0.00775	2.43511
0.0117	2.9004					0.01277	3.04977
0.0054	1.9647					0.00953	2.65603
0.1163	6.0197					0.000349069	0.54067
0.011	2.8017					0.01019	2.73615
0.0114	2.8728					0.05351	3.64347
0.0099	2.6756					0.000970432	1.72549
0.0066	2.1514					0.01074	2.78188
0.0047	1.8414					0.00169	1.13084
0.0101	2.686					0.00209	1.50697
0.0053	1.9496					0.00133	0.63027
0.0106	2.7447					0.01686	1.74331
0.0101	2.7024					0.0147	2.88702
0.0097	2.6437					0.01365	2.87198
0	0.5681					0.00879	0.85176
0.0122	2.9679					0.0067	2.31561
0.0258	4.2977					0.01133	3.13785
0.0109	2.0369					0.02235	2.62629
						0.01251	3.01092
						0.01085	2.70409
						0.01465	3.0144
						0.00684	1.97841
						0.00553	2.02954
						0.01718	2.57875
						0.00609	2.09346
						0.02221	3.90469
						0.00912	1.83358
						0.01475	3.01059
						0.01582	1.62813
						0.02683	3.98073
						0.01301	2.32944
						0.01958	2.93124
						0.01851	3.17783
						0.01273	2.41365
						0.00715	2.24642
						0.0053	1.18449
						0.01036	2.77982
						0.00852	2.67505
						0.01779	3.0637
						0.01925	1.7136
						0.01381	1.53598
						0.01402	3.14543
						0.00871	1.63393
						0.01255	2.81157
						0.0149	3.08182
						0.01309	2.76094
						0.01162	1.97406
						0.0074	1.902
						0.00662	2.20327
						0.02047	2.43488
						0.01022	2.98462
						0.0059	2.11085
						0.0374	4.31578
						0.01722	3.02708
						0.00575	2.05848
						0.0199	3.56337
						0.0116	2.78637
						0.01139	2.34656
						0.00905	2.70856
						0.01315	2.26288
						0.00498	1.81815
						0.0053	2.00364
						0.02178	3.96296
						0.00789	2.34947
						0.00681	2.24365
						0.01079	2.32574
						0.11852	5.7894
						0.01414	3.21934
						0.00869	2.24033
						0.013	2.57538
						0.04205	3.00244
						0.01144	2.76858
						0.01499	2.86403
						0.01331	2.40617
						0.00855	2.49788
						0.00587	2.04042
						0.00785	2.24664
						0.01308	2.95815
						0.01047	2.76859
						0.01454	2.61664
						0.01376	3.01675
						0.01046	2.72781
						0.01075	1.47018
						0.00963	2.23329
						0.00476	1.4136
						0.01328	2.95197
						0.01267	2.09514
						0.02038	2.74674
						0.00734	2.18173
						0.01279	2.99695
						0.01511	3.00346
						0.00347	0.84684
						0.00208	1.2414
						0.01461	3.2365
						0.000117995	1.00672
						0.00954	2.63952
						0.0271	2.90691
						0.01073	3.7301
						0.01652	2.83194
						0.01063	2.79295
						0.01276	3.0194
						0.0215	2.32086
						0.01049	2.65809
						0.000887555	0.80765
						7.48864e-06	3.63209
						0.01345	3.09734
						0.0254	2.35538
						0.0134	1.33264
						0.01124	1.96141
						0.03982	4.48871
						0.01095	2.76207
						0.00765	2.20453
						0.00375	1.66203
						0.01243	2.72674
						0.02278	3.96974
						0.0137	3.18704
						0.00842	2.0534
						0.00541	1.9859
						0.01793	2.18466
						0.000690293	1.55713
						0.005	2.19062
						0.01026	2.73031
						0.00857	2.07528
						0.00274	2.13763
						0.00376	1.62221
						0.02168	3.68726
						0.01734	2.78477
						0.01105	3.02788
						0.01796	2.28604
						0.0138	2.58179
						0.01799	2.60171
						0.01634	2.53625
						0.02808	2.70502
						0.01651	1.64643
						0.01648	3.45403
						0.00341	1.58196
						0.01016	2.46347
						0.01225	2.01682
						0.028	2.13855
						0.00708	2.34294
						0.0106	2.74183
						0.01107	2.85708
						0.00832	2.41469
						0.00302	1.46156
						0.00494	1.62882
						0.00568	2.05222
						0.01558	2.25736
						0.00951	2.25543
						0.01178	2.65321
						0.0183	3.58046
						0.01039	2.73922
						0.00992	1.10264
						0.01393	1.28354
						0.00677	1.87259
						0.01125	2.97331
						0.01173	2.22014
						0.01677	3.05598
						0.00808	2.45286
						0.01012	2.73764
						0.01476	3.24981
						0.01348	3.63038
						0.01102	1.6983
						0.0064	2.09948
						0.01064	2.78712
						0.01879	2.62824
						0.00582	2.00143
						0.0056	1.97407
						0.02116	2.71023
						0.00803	1.50874
						0.01183	1.82612
						0.01302	2.97551
						0.01569	2.04079
						0.01402	3.17103
						0.00386	1.65991
						0.00907	2.56649
						0.01703	3.51272
						0.00953	1.24059
						0.01233	2.99701
						0.00521	1.95565
						0.02189	2.54699
						0.00889	2.56549
						0.02226	1.4256
						0.01154	2.99025
						0.01532	2.90721
						0.00348	1.64237
						0.00635	2.14525
						0.00893	2.50863
						0.01129	2.71352
						0.00841	2.91121
						0.01089	2.79062
						0.01181	2.91646
						0.00596	2.20359
						9.65019e-07	1.02827
						0.01968	2.36788
						0.02156	2.47643
						0.00755	1.69767
						0.01833	1.84208
						0.01076	2.7795
						0.02911	2.45784
						0.01203	2.91117
						0.01206	2.91305
						0.01313	2.16766
						0.01633	2.50997
						0.02706	2.9119
						0.01002	2.67581
						0.00777	2.28591
						0.01459	3.13119
						0.01285	2.90209
						0.01433	3.22028
						0.01391	3.07032
						0.03281	3.70091
						0.00774	1.65694
						0.03269	4.06468
						0.01432	3.46903
						0.01069	2.63053
						0.01246	2.9349
						0.000815181	0.78514
						0.01666	3.4662
						0.00433	1.13251
						0.00954	2.0879
						0.0116	2.78815
						0.01291	3.01628
						0.00732	2.24022
						0.01792	2.62386
						0.00865	1.49544
						0.02233	3.34322
						0.02023	1.45629
						0.01208	2.91574
						0.01598	2.91251
						0.01029	2.73426
						0.01436	3.03412
						0.00599	2.34654
						0.02203	3.42754
						0.016	2.94249
						0.01313	2.34697
						0.00263	2.33205
						0.02038	3.76753
						0.02214	1.82117
						0.01046	2.0097
						0.01236	2.64904
						0.01764	1.87523
						0.01256	2.90717
						0.01014	2.73195
						0.01053	2.80062
						0.02094	1.57045
						0.01503	2.63181
						0.00749	2.26395
						0.01065	3.06908
						0.00232	1.32482
						0.01348	3.12679
						0.00992	2.68552
						0.03488	4.73112
						0.01085	2.80773
						0.01537	1.75466
						0.00661	2.18991
						0.02198	2.50187
						0.02437	3.04981
						0.001	0.89234
						0.00592	1.17079
						0.00754	2.89856
						0.05441	3.39624
						0.01097	2.88105
						0.01067	2.79021
						0.01202	2.30617
						0.00373	1.97451
						0.0102	2.70964
						0.00476	1.87105
						0.01233	3.00952
						0.01428	2.54595
						0.02293	2.90867
						0.00597	2.00815
						0.00841	2.35873
						0.01092	2.80975
						0.01061	2.72362
						0.02038	2.58821
						0.02029	3.81126
						0.01401	2.90031
						0.000388117	1.31877
						0.01055	2.88531
						0.01417	2.99339
						0.01378	3.1731
						0.01708	3.02962
						0.00878	2.50576
						0.00945	2.69736
						0.00952	2.56114
						0.01342	2.11055
						0.03472	2.99265
						0.00854	2.87526
						0.01377	1.44336
						0.00542	1.93994
						0.00318	1.38072
						0.00958	2.63658
						0.01155	2.57278
						0.00751	2.08435
						0.01138	2.8693
						0.01138	3.15448
						0.0127	3.25754
						0.01808	3.03832
						0.00785	2.34313
						0.01152	2.80458
						0.01633	1.61632
						0.01526	1.12272
						0.01575	2.88985
						8.97828e-07	0.5975
						0.01306	1.28432
						0.00934	2.60827
						0.04939	3.30908
						0.01566	2.43097
						0.01878	1.70229
						0.01661	2.88066
						0.01263	3.08169
						0.0106	2.52623
						0.00992	2.68342
						0.01258	3.00929
						0.00389	1.57832
						0.01539	2.70017
						0.01708	2.94071
						0.00612	2.02395
						0.01205	2.15107
						0.01279	3.0478
						0.13189	5.6822
						0.01085	2.96649
						0.00493	0.72939
						0.01008	1.77021
						0.00378	2.34872
						0.00133	0.76806
						0.02084	3.87602
						0.02279	1.88106
						0.01005	2.68511
						0.01395	2.88592
						0.00806	1.24387
						0.01215	2.58089
						0.01332	2.49707
						0.01208	1.46169
						0.01377	3.12761
						0.01442	3.06638
						0.01166	2.26665
						0.01922	1.88132
						0.02153	2.83148
						0.01356	2.75661
						0.00136	2.11649
						0.000261064	0.84252
						0.00825	2.64646
						0.01272	3.52068
						0.01051	2.18293
						0.0075	2.02918
						0.00169	1.67952
						0.00556	2.03086
						0.01372	3.13111
						0.00888	2.89109
						0.01332	3.1001
						0.01209	2.96199
						0.00764	2.01575
						0.01427	4.2031
						0.01136	2.0496
						0.00982	2.31533
						0.000911566	1.07213
						0.02091	3.14319
						0.00415	1.71163
						0.01417	2.32766
						0.00285	1.43031
						0.00446	1.84943
						0.00664	2.21904
						0.00518	1.94002
						0.018	1.53697
						0.00871	2.52349
						0.01532	2.33155
						0.01767	2.41684
						1.87483e-05	2.5244
						0.02342	2.75877
						0.01584	2.74126
						0.00653	2.44774
						0.0114	2.34871
						0.02199	2.3294
						0.01145	2.87477
						0.00659	2.19067
						0.02051	2.45783
						0.01401	3.12922
						0.01178	2.93659
						0.00424	1.9002
						0.0128	3.04831
						0.00907	2.55972
						0.00345	1.59234
						0.0031	1.9186
						0.01032	2.73402
						0.01396	2.84769
						0.00919	2.04458
						0.01535	3.29268
						0.00364	1.43252
						0.01038	3.20729
						0.012	2.94267
						0.01175	3.16352
						0.01227	2.91373
						0.01476	2.68981
						0.0099	1.19467
						0.01292	2.85314
						0.01065	2.84652
						0.01404	3.19558
						0.000194575	0.51431
						0.01969	1.70149
						0.0123	2.4033
						0.01092	3.04937
						0.01471	2.19022
