# Supplementary material for: Cell crowding activates pro-invasive mechanotransduction pathway in high-grade DCIS via TRPV4 inhibition and cell volume reduction
Source: eLife. 2025 Apr 21;13:RP100490. doi: 10.7554/eLife.100490 (PMC12011371; doi:10.7554/eLife.100490)
Supplement: Figure 6—source data 7. [file elife-100490-fig6-data7.xlsx]

## Sheet: Sheet1
Numerical data for Figure 6K - for % PM TRPV4 comparisons in ETCC-06 cells
ETCC-006 Control	ETCC-006 GSK 1	ETCC-006 GSK 2	ETCC-006 PEG	ETCC-006 OC
5.07246	6.68176	13.5554	3.37771	10.9807
2.56459	11.3744	9.36718	5.42848	13.043
9.9377	2.66195	13.0716	7.37644	6.6463
5.34998	1.70704	16.5851	4.8554	7.30447
4.12164	2.79029	8.48602	4.8554	5.70188
6.62613	3.42821	7.48015		8.14827
11.747	6.76445	5.71925		7.76155
12.5854	19.4361	14.0835		11.3827
14.2273	9.88237	15.6834		6.66273
	4.16733	8.13416		11.3835
4.74512
8.75373
0.561722
