# Supplementary material for: Cell crowding activates pro-invasive mechanotransduction pathway in high-grade DCIS via TRPV4 inhibition and cell volume reduction
Source: eLife. 2025 Apr 21;13:RP100490. doi: 10.7554/eLife.100490 (PMC12011371; doi:10.7554/eLife.100490)
Supplement: Figure 6—source data 8. [file elife-100490-fig6-data8.xlsx]

## Sheet: Sheet1
Numerical data for Figure 6L - for D and v values of single ETCC06 cells
ctrl-D	ctrl-v	gsk1-D	gsk1-v	gsk2-D	gsk2-v	peg-D	peg-v
0.01106	2.81764	0.01635	3.0717	0.00603	1.70237	0.01118	2.83003
0.0126	3.00009	0.00717	1.67948	0.01103	2.81654	0.01213	2.31521
0.00405	1.29637	0.01796	3.83146	0.10579	5.46879	0.01179	2.91815
0.02036	3.83278	0.01044	2.76825	0.02861	2.16154	0.00010885	2.35739
4.17499e-05	0.29539	0.01232	2.98512	0.01267	2.92716	0.01185	2.86861
0.01016	2.758	0.01443	4.00601	0.02451	3.15974	0.01055	2.80328
0.02257	4.03538	0.01567	3.45919	0.00117	0.91309	0.00625	2.11668
0.01204	2.91194	0.01144	2.87615	0.00981	0.717	0.01197	2.9352
0.01063	2.7439	0.00217	1.04054	0.000830094	0.75702	0.01144	2.87531
0.01095	2.74302	0.02804	2.47013	0.01277	2.91181	0.01079	2.78636
0.01264	3.01454	0.02674	4.7144	0.01989	2.36175	0.00425	1.75986
0.01074	2.77338	0.03724	2.93482	0.01601	3.39379	0.00876	1.96436
0.00187	1.17761	0.01001	2.7194	0.00264	1.37034	0.00987	2.23155
0.01864	3.67338	0.0185	2.93652	0.00447	1.84592	0.00192	1.12887
0.01218	2.96217	0.02692	1.83239	0.0158	2.04876	0.00983	2.78614
0.0124	2.97972	0.01209	1.77926	0.00947	2.60664	0.01141	2.84501
0.0132	3.11642	0.02956	3.13091	0.00982	2.56467	0.01214	2.88754
0.01098	2.81651	0.00936	1.93435	0.02016	1.43396	0.01714	3.52072
0.01207	2.94989	0.000347117	1.70384	0.00979	2.5397	0.00675	2.17425
0.00516	1.94268	0.0409	3.77619	0.01157	2.87237	0.00225	1.25878
0.00307	1.45044	0.0293	4.81053	0.01189	2.87077	0.0117	2.92028
0.00394	1.60709	0.01096	2.81992	0.03067	2.95512	0.00224	1.28725
0.01147	2.79696	0.01319	3.28282	0.03271	2.15724	0.02078	3.92511
0.01157	2.8846	0.02	3.69413	0.01111	2.81875	0.0085	2.66733
0.01015	3.37387	0.0118	2.85571			0.00903	2.2269
0.00652	2.16234	0.01523	2.55717			0.01553	2.41557
0.01054	2.75894	0.00957	3.1258			0.01234	2.97434
0.00969	2.6431	0.002	3.36665			0.01448	2.88897
0.01187	2.88678	0.0207	3.14803			0.01155	1.10558
0.01061	2.7619	0.01236	2.37698			0.01425	3.06391
0.00808	2.40583	0.03467	5.01823			0.00309	1.49501
0.0068	1.88827	0.00237	3.082			0.00436	1.75584
0.01308	3.08285	0.0081	3.51154			0.01137	2.8558
0.01123	2.83914	0.02397	4.58287			0.01144	2.88849
0.01596	3.39843	0.0153	1.44667			0.00767	2.33622
0.01807	2.68339	0.01215	3.72691			0.01019	2.72515
0.00585	2.02781	0.01164	2.92154			0.01383	3.17023
0.01077	2.81403	0.0124	3.47983			0.01186	2.91255
0.0111	2.8173	0.00762	2.14084			0.00551	1.98945
0.01342	2.61299	0.00909	2.60563			0.01277	3.02786
0.00479	1.83887	0.03586	4.37935			0.02482	2.81059
0.00532	2.08675	0.02573	4.16909			0.01309	3.08121
0.0113	2.8464	0.02644	2.87184			0.0054	1.97885
0.01227	2.94746	0.01668	3.46921			0.01318	3.1283
0.00336	1.58148	0.02656	1.07678			0.01079	2.78316
0.01194	2.96912	0.01365	3.76811			0.01071	2.75711
0.01245	3.0022	0.0132	2.90598			0.00772	2.36718
0.00655	2.19568	0.00783	2.38327			0.00955	2.62306
0.00774	2.35002	0.00774	2.3823			0.01331	3.11891
0.01297	2.40609	0.01357	3.12125			0.01438	3.2774
0.01317	3.07464	0.03478	4.89593			0.0116	2.87697
0.01517	2.20473	0.01802	0.39791			0.00344	1.56946
0.00501	1.9006	0.01101	3.59574			0.00877	2.4996
0.01034	2.69852	0.01053	2.71848			0.00511	2.03657
0.01166	2.89265	0.01082	3.3141			0.00633	2.14583
0.02504	3.45227	0.01653	3.85381			0.01274	3.03682
0.00364	1.63355	0.00231	3.20861			0.01139	2.84784
0.0124	3.00294	0.00802	2.35513			0.02179	3.96038
0.026	8.70273	0.01999	3.17877			0.00644	2.15129
0.01105	2.81986	0.03073	2.484			4.80806e-05	0.24531
0.01556	4.18553	0.03214	3.42029			0.00708	2.49382
0.01187	2.88919	0.01691	1.13692			0.00964	2.62945
0.01354	3.06644	0.03242	5.67078			0.0025	1.41809
0.00998	2.68616	0.00818	2.82384			0.0074	2.28221
0.02839	3.63488	0.01618	2.25264			0.01247	3.03174
		0.00858	3.01584			0.00312	1.5095
						0.01011	2.68409
						0.0103	2.72535
						0.01197	2.92319
						0.00048868	0.62097
						0.01313	2.71587
						0.01216	2.94952
						0.01174	2.9163
						0.00216	1.31706
						0.0023	1.24792
						0.00977	2.64079
						0.01319	3.08708
						0.01117	2.84544
						0.00979	2.6597
						0.0119	2.91841
						0.01201	2.93951
						0.01051	2.75708
						0.01151	2.42681
						0.00102	0.91323
						0.01014	2.71125
						0.01435	3.17819
						0.01257	3.01816
						0.01172	2.90045
						0.01528	3.87413
						0.01939	3.75261
						0.00676	2.12274
						0.00234	1.25798
						0.02725	2.31854
						0.01425	3.61795
						0.02709	2.24212
						0.01332	3.06482
						0.01017	2.69393
						0.0039	2.11191
						0.01035	2.69692
