# Supplementary material for: Cell crowding activates pro-invasive mechanotransduction pathway in high-grade DCIS via TRPV4 inhibition and cell volume reduction
Source: eLife. 2025 Apr 21;13:RP100490. doi: 10.7554/eLife.100490 (PMC12011371; doi:10.7554/eLife.100490)
Supplement: Figure 6—source data 9. [file elife-100490-fig6-data9.xlsx]

## Sheet: Sheet1
Numerical data for Figure 6N - for % PM TRPV4 comparisons in ETCC-10 cells
ETCC 10 ND CTRL	ETCC 10 ND 0.3 Osm/L PEG 300	ETCC 10 ND GSK1	ETCC 10 ND GSK2	ETCC 10 OC CTRL
4.6302	9.63021	6.87227	1.95846	10.4382
7.9438	8.15297	12.4139	8.77061	5.1675
7.33839	2.34748	7.98052	8.32308	9.67664
9.36353	1.54436	2.44476	6.58498	0.861895
2.4174	1.3846	1.94957	5.10403	2.89081
			4.98357	3.1924
			5.44144
