# Supplementary material for: Cell crowding activates pro-invasive mechanotransduction pathway in high-grade DCIS via TRPV4 inhibition and cell volume reduction
Source: eLife. 2025 Apr 21;13:RP100490. doi: 10.7554/eLife.100490 (PMC12011371; doi:10.7554/eLife.100490)
Supplement: Figure 6—source data 10. [file elife-100490-fig6-data10.xlsx]

## Sheet: Sheet1
Numerical data for Figure 6O - for D and v values of single ETCC010 cells
ctrl-D	ctrl-v	gsk1-D	gsk1-v	gsk2-D	gsk2-v	peg-D	peg-v
0.0075	2.3057	0.03724	4.2138	0.00804	2.40097	0.0104	2.739
0.001	0.8549	0.00875	2.59032	0.01097	2.80856	0.0121	2.9302
0.156	6.3037	0.00555	1.73441	0.01221	2.97179	0.0088	2.518
0.011	2.8175	0.0116	2.98135	0.00141	0.98404	0.0122	2.9671
0.0135	2.9774	0.02138	3.05906	0.00352	1.5947	0.0017	1.0958
0.0054	1.9631	0.04385	4.82216	0.02067	3.85188	0.0137	3
0.0099	2.6706	0.02818	3.99376	0.01153	2.87582	0.0013	0.9601
0.0252	3.5495	0.00908	2.5078	0.00643	2.1612	0.0118	2.8293
0.0114	2.8586	0.01526	3.57284	0.05894	4.45326	0.0121	2.9469
0.0078	2.3388	0.02856	1.76925	0.0045	1.7038	0.0074	2.3157
0.0298	4.6406	0.01407	1.54087	0.01064	2.76804	0.0127	3.0159
0.0122	2.9635	0.02052	2.97926	0.00573	2.03713	0.0053	1.9654
0.0126	2.9985	0.01797	1.2118	0.01135	2.85211	0.01	2.6469
0.0095	2.5901	0.00281	0.56647	0.00704	2.24688	0.0093	2.589
0.0018	1.1521	0.00649	2.62321	0.01368	3.13887	0.0046	1.2258
0.0073	2.5152	0.00215	2.19264	0.00877	2.5122	0.0105	2.7404
0.0132	2.2591	0.01335	3.35636	0.01336	3.04867	0.0116	2.8894
0.0137	3.139	0.01018	1.74888	0.00766	2.33712	0.0096	2.6298
0.0095	0.9773	0.0163	3.09985	0.01214	2.96164	0.0107	2.7776
0.0063	2.1355	0.01366	1.08331	0.00549	1.99264	0.0056	2.0047
0.0016	1.0775	0.02247	3.62204	0.01117	2.8236	0.0111	2.8238
0.0016	1.0656	0.02804	4.8181	0.00393	1.69176	0.0021	1.2053
0.0106	2.7594	0.01237	2.52272	0.0104	2.74855	0.0117	2.9073
0.0067	2.1983	0.0073	1.79633	0.00156	1.0632	0.011	2.8195
0.0106	2.773	6.14627e-06	1.36772	0.01423	3.19755	0.0123	2.9758
0	1.378	0.00521	3.11934	0.0098	2.65227	0.012	2.9411
0.0008	0.7074	7.4e-05	1.35629	0.00313	1.47703	0.0053	1.9392
0.0119	2.9259	0.00077568	3.31553	0.00978	2.65314	0.012	2.9424
0.0069	2.1508	0.01308	3.08285	0.01213	2.94825	0.0019	1.1771
0.0124	2.9839	0.01546	3.53315	0.01156	2.88381	0.0131	3.0749
0.0115	2.8664	0.01434	3.18539	0.00645	2.15604	0.0082	2.459
0.0137	3.1577	1.56343e-06	2.8688	0.0072	2.27782	0.0026	1.3807
0.0027	1.4121	0.01522	3.3041	0.01201	2.93506	0.0051	1.9168
0.0057	2.0269	0.01739	4.05778	0.01279	3.03519	0.0032	1.5145
0.0143	3.847	0.00763	0.49522	0.01164	2.84291	0.006	2.0751
0.0163	2.9326	0.01366	2.70413	0.00592	2.04946	0.0073	2.2896
0.0035	1.5698	0.01676	3.43788	0.01713	3.51571	0.0098	2.6417
0.0172	2.9356	0.03727	5.02394	0.01084	2.79356	0.0129	3.0409
0.0006	0.6502	0.01349	3.28309	0.01347	3.11391	0.0133	3.1013
0.0032	1.5107	6.66534e-08	0.99312	0.01277	3.03148	0.012	2.9504
0.0081	2.3932	0.00607	2.11761	0.01311	3.00381	0.0012	0.88
0.0138	3.1507	0.03065	0.87266	0.00745	2.31152	0.0126	3.0068
0.0078	2.3374	3.15526e-05	1.3695	0.01173	2.90611	0.0073	3.0287
0.0135	3.1065	0.00149	2.31396	0.01162	2.89223	0.0111	2.8192
0.0084	2.4562	0.01174	2.92069	0.00792	2.41231	0.0096	2.6348
0.0118	2.9025	0.000101742	1.21781	0.01386	2.98491	0.0067	2.1677
0.0072	2.2916	0.00221	4.02751	0.01169	2.8824	0.0077	2.3561
0.011	2.4828	0.10376	5.3658	0.01395	3.18346	0.0102	2.714
0.0133	3.0994	0.01339	3.08362	0.00082707	0.64969	0.0075	2.3173
0.0113	2.8422	0.01247	2.97573	0.00115	0.88647	0.0065	2.1434
0.011	2.8175	0.01363	0.9525	0.01428	3.20793	0.012	2.9135
0.0032	1.5037	0.04383	5.32958	0.01857	3.6601	0.0111	2.8359
0.0181	3.605	0.00566	2.00132	0.00716	2.25164	0.0056	2.015
0.0133	3.0731	0.01672	3.4493	0.000983242	2.94484	0.0045	1.7816
0.013	3.0657	0.00896	0.85163	0.00707	2.26091	0.0088	2.5206
0.0116	2.8782	0.00298	1.5637	0.01218	2.96176	0.009	2.5491
0.0084	2.4631	0.01392	1.39606	0.01117	2.84106	0.0156	3.3472
0.0214	0.2497	0.01097	2.84462	0.022	3.98451	0.0119	2.9566
0.0111	2.7813	0.01239	3.8063	0.00826	2.43323	0.0132	3.1348
0.0041	1.6971	0.01083	2.63355	0.00872	2.51189	0.0191	3.6986
0.0169	3.1019	0.01209	3.38351	0.00252	2.58608	0.0124	2.9888
0.0112	2.8391	0.01673	3.54651	0.0136	3.12905	0.0254	4.2518
0.0177	1.7838	0.000420266	0.19384	0.00728	2.28368	0.0138	3.1446
0.0158	2.6451	0.00745	2.95341	0.01297	2.82409	0.0044	1.7679
0.0067	2.1958	0.01134	2.34027	0.00814	2.42382	0.0033	1.5348
0.0066	2.1752	0.00942	2.57155	0.01223	2.98012	0.0147	2.3739
0.0056	2.0158	0.01962	2.94046	0.01411	3.18449	0.0054	1.5762
0.0114	2.872	0.03258	2.09869	0.00862	2.47628	0.0033	1.4822
0.0074	2.3194	0.000621431	0.54274	0.01031	2.69753	0.0113	2.8568
0.0133	3.0927	0.02619	4.11183	0.00472	1.84319	0.0027	1.7341
0.0112	2.8237	0.03629	2.73615	0.01131	2.84043	0.0114	2.8707
0.0102	2.6913	0.01909	3.95858	0.01048	2.74284
0.0078	2.2172	0.07776	3.42773	0.01245	2.99018
0.0127	2.9989	0.01756	2.36022
0.0124	2.9791	8.22576e-06	4.12866
0.0083	2.4429	0.02166	3.93504
0.0072	1.704	0.01302	3.72028
0.0262	3.1614	0.02235	1.56076
0.0045	1.0893	0.00679	2.27964
0.017	3.4787	0.00765	2.42433
0.0022	1.2393	0.0149	3.23589
0.0091	2.5678	0.01915	3.45339
0.01	2.6956	0.02221	1.42698
0.014	3.1726	0.02479	3.80228
0.0053	1.9491	0.00802	1.1497
0.0117	2.9114	0.02362	4.07653
0.0112	1.6634	0.00879	2.55831
0.0009	0.7959	0.01331	3.14329
0.0139	3.1548	0.01205	2.54333
0.0116	2.8919	0.01263	0.93852
0.004	1.7313	0.01568	3.42338
0.0156	3.349	0.00848	2.01399
0.0131	3.0769	0.01091	2.71967
0.0112	2.843	0.00496	2.26495
0.0131	3.0716	5.00503e-06	4.55804
0.0085	2.473	0.01553	1.73417
0.0125	3.0018	0.01322	1.97573
0.027	4.4095	0.000118873	2.36347
0.0069	2.1711	0.0131	3.08712
0.0087	2.4905	0.00767	2.35381
0.0114	2.8623	0.0095	2.61402
0.0133	3.1429	0.01719	3.52658
0.0135	3.1799	0.02479	4.60518
0.002	1.1922	0.01493	3.22361
0.0212	3.867	0.00852	0.37925
0.0132	3.0789	0.01296	3.03898
0.0126	3.0121	0.01136	2.89459
0.0144	3.2317	0.00522	1.66642
0.0034	1.5244	3.83287e-06	1.79377
0.0099	2.6753	0.00588	1.95315
0.01	2.6738	0.01974	3.7534
0	0.1156	0.00809	0.39855
0.0193	3.7345	0.00633	1.99021
0.003	2.0309	0.01429	3.18692
0.0155	3.3346	0.00968	2.63917
0.0136	3.1462	0.000464397	0.41453
0.0081	2.4251	0.01666	2.42373
0.0081	2.4128	0.03397	4.01695
0.0223	2.5277	0.01322	3.14758
0.0083	2.4499	0.01671	1.70085
0.0047	1.8034	0.00745	1.58824
0.0068	2.1704	0.01794	2.72117
0.0172	3.516	0.01118	2.83471
0.0113	2.8246	0.00808	2.37606
0.0121	2.9506	0.02341	1.90208
0.0032	2.5001	0.01447	3.19666
0.0131	2.776	0.00156	0.27137
0	0.2682	0.021	3.92697
0.0094	2.6112	0.0064	2.07279
0.0125	3.0142	0.01548	1.70032
0.0062	2.3568	0.01191	3.21452
0.0045	1.7798	0.01684	1.16445
0.0109	2.788	0.00554	1.96744
0.0117	2.8933	0.02084	1.70483
0.0227	2.2892	0.02273	2.42068
0.0157	3.3642	0.00756	2.36664
0.0533	3.8032	0.0276	3.95231
0.0089	2.4713	0.00258	2.4132
0.0093	2.5866	0.01875	3.6375
0.0112	2.8514	0.00516	1.92944
0.0113	2.8476	0.01231	2.80546
0.0116	2.8772	0.00711	2.29331
0.0114	2.8625	0.00261	3.02364
0.0237	4.1351	0.00698	1.12397
0.0129	3.0485	0.0111	3.25385
0.0065	1.6245	0.02569	4.19078
0.0013	0.9223	3.26958e-07	2.02262
0.0137	3.1649	0.02987	2.63713
0.0164	3.4435	0.01356	3.01981
0.0101	2.8449	0.02027	3.77862
0.0169	2.8578	0.00526	1.34339
0.0081	0.1197	0.01287	3.03105
0.0048	1.8535	0.01309	3.06055
0.0023	1.301	0.00736	2.20561
0.0108	2.7826	0.01417	2.844
0.0097	2.6382	0.00958	2.62449
0.0064	2.1711	0.0054	1.17649
0.0124	2.9864	0.01303	3.09618
0.021	3.8909	0.01755	2.33508
0.0042	1.707	0.00568	2.00124
0.0021	1.2603	0.0015	1.0425
0.0083	2.4359	0.01036	2.7386
0.0113	2.8147	0.01337	3.10252
0.002	1.2223	0.01126	2.8516
0.02	3.2595	0.01568	2.96914
0.0141	3.1893	0.00051074	0.63011
0.002	2.3131	0.00254	1.36011
0.0167	3.4604	0.00572	2.046
0.0125	3.0676	0.01201	2.94863
0	0.123	0.02269	2.40232
0.0101	2.7045	0.01497	1.16208
0.0118	2.8962	0.01696	3.49373
0.0115	3.0026	0.01351	3.12117
0.0112	2.8406	0.00428	1.75022
0.0053	1.9258	0.01085	2.77761
0.0166	3.4657	0.00677	2.13578
0.0164	3.4423	0.000370681	0.54389
0.0082	2.3641	0.02095	3.81851
0.0239	3.1079	0.03393	4.56626
0.0029	1.2851	0.01122	0.15334
0.0093	2.5844	0.00070419	0.91716
0.0176	3.939	0.0128	2.99931
0.0041	1.7214	0.0133	3.10481
0.0141	3.1834	0.01268	3.02166
0.0226	4.0372	0.0116	0.65246
0.0153	3.3254	0.00478	1.83482
0.0122	3.1397	0.01454	3.00138
0.01	2.1257	0.01546	2.91384
0.0055	1.9773	0.0133	3.15888
0.0128	3.0166	0.02088	3.40274
0.0101	2.719	0.01703	4.05329
0.0212	1.7732	0.01801	3.64847
0.0047	1.8364	0.02998	4.44936
0.0147	2.5519	0.01872	2.42285
0.0149	3.2767	0.01344	2.50709
0.0091	1.7764	0.01238	2.9856
0.0112	2.8463	0.00862	0.89361
0.0017	2.4667	0.0037	3.20025
0.0089	2.4988	0.0112	2.79069
0.0023	1.2758	0.01789	0.88503
0.0066	2.1871	0.09476	5.1932
0.0061	2.0938	0.03678	5.67429
0.0059	2.0594	0.01009	3.08053
0.012	2.9404	0.01267	3.02207
0.0116	2.8992	0.00546	1.41451
0.0081	2.4123	0.00835	2.7539
0.0131	3.091	0.0138	3.26122
0.0059	2.0605	0.01063	2.67912
0.0089	2.536	0.01296	3.28134
0.0109	2.7976	0.000386611	1.88938
0.0124	2.4883	0.00285	1.60271
0.0064	2.1485	0.00858	3.51339
0.0113	2.8428	0.02336	3.68603
0.0131	3.0784	0.00901	2.2424
0.0002	0.3652	0.01031	2.12514
0.0193	2.4635	0.02302	2.10182
0.0042	1.7675	0.01914	0.61793
0	0.2539	0.000268373	1.30457
0.0001	0.4975	0.00172	1.81868
0.0041	1.7171	0.00401	1.51782
0.0067	2.1987	0.00858	3.65344
0	0.8091	0.01396	3.17076
0.0055	1.9948	0.01109	3.44502
0.0078	2.214	0.00978	1.36191
0.0134	3.1147	0.00183	1.67938
0.0113	2.8907	0.02404	3.6363
0.0126	3.0177	0.00109	2.57779
0.0101	2.6789	0.00929	2.75551
0.0009	0.8036	0.01844	2.74902
0.0101	2.705	3.56399e-06	0.89721
0.0129	2.3953	0.01733	3.5322
0.0114	2.8674	0.02037	4.17367
0.002	1.3954	0.02754	2.26283
0.0011	2.0233	0.02394	2.56144
0.0211	2.4936	0.01142	1.1417
0.0113	2.847	0.01805	3.64583
0.015	3.2772	0.03797	3.18894
0.0063	2.4717	0.02028	3.01575
0.0099	2.6622	0.00807	1.2046
0.0003	2.0802	1.49805e-05	2.39317
0.0048	1.8671	0.01299	1.79521
0.0118	2.9233	0.02224	2.91032
0	1.5967	0.00959	1.24214
0.0056	1.992	0.04409	5.01785
0.0127	3.1307	0.02302	1.80791
0.0106	3.994	0.02632	1.98974
0.0124	2.99	0.01591	2.59606
0.0122	2.9851	0.03516	2.47512
0.0177	3.1962	0.01566	1.13473
0.0053	1.9724	0.03475	4.96318
0.025	4.2489	0.02193	3.61395
0.0138	3.1417	0.0172	3.25553
0.0024	2.4641	0.00783	2.12523
0.0368	3.3717	0.06416	3.02256
0.0057	2.0295	0.05089	6.07205
0.0187	3.1047	0.01207	2.84944
0.0138	3.1452	0.01966	3.62925
0.0016	1.0702	0.02279	4.06171
0.0019	1.2059	0.02219	3.96129
0.0056	2.0133	0.02152	3.53376
0.0004	0.923	0.0292	2.71794
0.0155	3.1096	0.04213	3.74968
0.0238	2.1023	0.02777	4.71369
0.0089	2.5201	0.00226	3.01161
0.018	2.6868	0.0131	3.07379
0.0113	2.847	0.00718	3.45548
0.0006	2.6893	0.01608	3.32275
0.0148	3.2659	0.01695	3.48432
0.0105	2.7433	0.01031	2.7426
0.0161	2.9948	0.01366	1.47665
0.0125	2.9885	0.00738	1.99063
0.107	5.7	0.01127	2.7793
0.009	1.2647	0.01522	3.4624
0.0057	2.0261	0.01305	3.1828
0.0055	1.9883	0.02315	2.53627
0.0392	3.5231	0.00459	1.87222
0.0057	1.9879	0.00453	1.81372
0.0111	2.8278	0.00359	1.731
0.0026	2.0467	0.00406	2.0539
0.0107	2.7674	0.01887	2.64873
0.0023	1.2923	0.000722645	1.16759
0.0003	0.4853	0.00977	3.0764
0.0352	3.3362	0.01421	3.24146
0.0104	2.7559	0.01393	3.86211
0.0071	2.1981	0.011	2.58365
0.0163	3.4421	0.01828	2.52134
0.0112	3.0208	0.01056	0.30591
0	1.7776	0.00849	2.47357
0.0136	3.1115	0.01419	3.55741
0.0125	2.9858	0.0116	2.75181
0.0103	2.7159	0.000285771	0.55157
0.0125	2.9974	0.01156	2.90052
0	0.3232	0.00265	2.75694
0.0086	2.9569	0.02776	2.43875
0.0552	6.3044	0.01538	3.31317
0.0132	2.6997	0.00456	1.83897
0.0128	3.0385	0.01699	2.42558
0.015	3.2824	0.01045	3.05228
0.0101	2.6879	0.01377	3.49877
0.0383	4.0511	0.01315	3.08048
0.0125	2.9938	0.01177	3.59416
0.0102	1.7474	0.00865	2.48718
0.0173	3.3589	0.00118	0.92544
0.0123	2.9398	0.01075	3.45758
0.0044	2.146	0.00717	2.27587
0.0078	2.3426	0.01181	2.90939
0.0128	3.0357	0.00135	0.97244
0.014	3.1717	0.02104	3.87436
0.0207	2.6122	0.01107	2.8237
0.008	2.39	0.01231	2.95409
0.0041	1.7273	0.01459	2.82741
0.0106	2.7703	0.00731	2.96475
0.012	2.9445	0.02122	3.6629
0.0179	4.4676	0.01331	3.13145
0.0087	2.4895	0.02137	4.2265
0.0119	2.9214	0.02761	3.86317
0.0063	2.129	0.01092	2.81843
		0.01325	2.36966
		0.00983	2.65585
		0.0452	5.7058
		0.000388753	1.81497
		0.00883	3.73716
		0.01174	3.73717
		1.42605e-05	0.66233
		0.01309	2.757
		0.0011	2.4721
		0.013	1.99771
		0.000142841	0.65468
		0.00746	3.10018
		0.03762	5.21063
		0.01298	3.01571
		0.0062	2.00911
		0.02837	2.8445
		0.01006	2.82208
		0.01749	3.50012
		0.01435	3.07505
		0.00527	1.74819
		0.00744	1.87196
		0.03565	2.36292
		0.01658	1.74786
		0.00342	0.9069
		0.01356	3.15088
		0.00241	1.30569
		0.00206	1.06285
		0.03217	3.11745
		0.01012	1.33421
		0.07241	4.78447
		0.02258	1.76705
		0.00522	1.45068
		0.03413	3.62762
		0.05636	4.89234
		0.01171	1.33348
		6.81363e-05	1.22197
		0.01308	2.97146
		0.02895	4.18756
		0.03176	3.9801
		0.01245	2.96244
		0.00593	1.32111
		0.00451	1.30706
		0.07027	4.68036
		0.00147	1.01056
		0.01652	3.43815
		0.01369	3.15001
		0.0012	2.90534
		0.0246	4.61155
		0.02548	3.95397
		0.0074	3.15307
		0.02405	3.68329
		0.000590445	1.80061
		0.01634	3.24473
		0.02688	4.23177
		0.03312	3.44078
		3.8519e-05	1.30549
		0.00622	1.47082
		0.000614585	1.96659
		0.03665	2.53479
		0.01072	2.68191
		0.01527	2.46621
		0.06684	4.50992
		0.0062	2.12291
		0.01659	2.9241
		0.00513	2.19148
		0.00836	2.45149
		0.01681	3.75683
		0.03263	5.03666
		0.000491594	1.16547
		0.000380838	0.53669
		0.01219	3.23485
		0.000302399	3.14394
		0.02391	3.87034
		0.01444	3.38873
		0.01649	3.31044
		0.00387	0.91757
		0.01812	3.81748
		0.0093	1.1274
		0.00621	2.51741
		0.05188	4.68044
		0.01483	3.17585
		6.78814e-07	3.342
		0.0046	1.74824
		0.00713	2.34089
		0.01279	1.84591
		0.00996	2.69387
		3.08974e-06	1.916
		0.05934	4.50834
		0.01726	3.15801
		0.01509	3.61472
		0.02111	4.36428
		0.00069479	0.75478
		0.00286	1.36685
		0.00423	1.73713
		0.01054	2.72918
		0.02103	3.12862
		0.01975	3.51404
		0.01286	3.15536
		0.0209	4.56994
		0.01463	3.26242
		0.01685	3.46754
		0.00627	2.15118
		0.02494	2.8041
		0.01257	2.98782
		0.0141	0.39438
		0.01282	1.89175
		0.02058	2.1839
		0.02617	1.82405
		0.00859	2.19033
		0.01237	1.90899
		0.02407	4.1244
		0.01703	2.40038
		0.02198	3.95587
		0.0189	1.79284
		0.01431	2.01063
		0.00449	1.69573
		0.00801	3.13273
		0.01109	2.98493
		2.38243e-06	3.36367
		0.0143	2.13207
		0.01237	1.62804
		0.01003	2.9206
		0.00375	1.65317
		0.03584	3.09184
		0.01921	2.90036
		0.01018	3.20553
		0.00845	2.47456
		0.01538	3.33506
		0.04519	3.11666
		0.02644	2.84891
		3.04312e-05	3.01441
		0.000808724	0.64892
		0.02115	1.62467
		0.02325	2.35687
		0.00356	1.78395
		0.02205	3.99392
		0.00957	3.0348
		0.0117	2.90097
		0.0143	3.19576
		0.02817	3.14504
		0.00794	3.7558
		0.01494	3.32023
		0.09964	4.91725
		0.05506	4.77435
		0.02083	1.29637
		0.0179	3.97708
		0.01178	2.90707
		0.01418	1.30565
		0.01656	3.49427
		0.01656	3.8454
		0.00137	0.66688
		0.00494	2.57333
		0.04762	3.41398
		0.03478	4.83151
		0.036	5.34367
		0.006	1.75331
		0.01038	2.74151
		0.000860926	0.82544
		0.03989	5.52378
		0.00728	2.22367
		0.01021	1.04743
		0.02237	2.37869
		0.01374	3.77172
		0.01089	2.88693
		0.01377	3.34673
		0.01063	3.37204
		0.04023	5.32761
		0.03102	4.7319
		0.03962	5.45618
		0.02477	3.0835
		0.01429	3.24256
		0.0049	1.78258
		0.05373	5.4687
		0.02781	2.6981
		0.00866	1.64649
		0.00141	1.11626
		0.04735	3.59121
		0.02622	3.99012
		0.02119	2.34512
		0.01896	2.24087
		0.02673	2.5439
		0.02115	3.44093
		0.00728	0.23804
		0.00828	3.16944
		0.000843047	0.75259
		0.00966	2.86023
		2.73807e-05	0.37228
		0.00962	2.62234
		0.00753	2.33125
		0.0018	0.51113
		0.06382	3.99232
		0.01232	1.90358
		0.0019	2.38417
		0.02122	2.8055
		0.0216	2.79834
		0.00272	1.67377
		0.19931	7.57595
		0.014	3.29575
		0.00849	2.31538
		0.01111	3.469
		0.0086	1.19055
		0.00553	1.98558
		0.02074	3.72508
		0.00566	1.74169
		0.00835	2.89037
		0.00427	1.7498
		0.01767	3.22811
		0.03597	5.72137
		0.01285	3.03746
		0.00124	3.1831
		0.01536	3.68099
		0.02244	1.07604
		0.01398	3.12995
		0.00365	0.85603
		0.01786	3.05356
		0.05055	4.90325
		0.00799	0.48935
		0.0161	3.03982
		0.02429	3.22322
		0.02231	2.70823
		0.00746	1.78721
		0.0236	0.85473
		0.00175	2.77076
		3.53571e-05	2.42635
		0.0125	3.77744
		0.00415	2.28111
		0.000736141	2.72911
		0.01513	4.01042
		0.01411	2.78076
		0.01112	1.88947
		0.02278	3.22653
		0.00817	2.23893
		0.02203	2.94101
		0.01465	1.05826
		0.01291	3.05969
		0.01916	1.57998
		0.00534	0.74671
		0.02423	4.15979
		0.01218	2.19748
		0.01974	2.98549
		0.04444	4.99845
		0.01336	3.69056
		0.01191	2.89143
		0.00599	1.95649
		0.02416	4.16109
		0.02177	4.15991
		0.01584	3.12878
		0.01291	2.28106
		0.00352	1.78502
		0.000520794	2.57065
		0.01184	3.3506
		0.01502	2.70181
		0.01463	3.17598
		0.01056	2.45953
		0.00661	2.19273
		0.0141	2.10763
		0.0632	4.84991
		4.59949e-06	2.40703
		4.18599e-08	2.81593
		0.01014	3.25486
		0.0289	3.5627
		0.01467	3.1037
		0.000353239	0.56974
		0.01157	2.89556
		0.01904	2.45063
		0.01996	1.47916
		0.01159	2.93594
		0.01634	2.74563
		0.00263	1.17375
		0.02197	3.2546
		0.00643	1.8646
		0.01195	2.96484
		0.02558	2.89359
		0.01415	3.18412
		0.01275	0.3864
		0.00506	1.93049
		0.01421	3.54995
		0.00859	2.5164
		0.00237	3.20579
		0.00254	1.50015
		0.02705	3.37028
		4.44138e-09	1.91109
		0.01379	3.98205
		0.00384	0.62174
		0.0141	3.5484
		0.01008	2.51194
		0.02846	3.74465
		0.00019973	0.91187
		0.01911	2.06604
		0.00775	1.68211
		0.00445	1.68711
		0.0205	2.82795
		0.00304	1.53194
		0.03897	5.04828
		0.0101	3.46017
		0.01209	2.96577
		0.00386	3.25801
		0.000956353	0.44046
		0.014	3.17124
		0.00784	2.36195
		0.03136	3.79516
		0.01262	2.14675
		0.01791	3.14033
		0.01702	1.86359
		0.0296	2.56481
		0.02526	3.76933
		0.00942	1.75057
		0.01187	2.77845
		0.02495	3.49164
		0.00495	2.57488
		0.02251	3.99874
		0.00517	1.94963
		0.01136	3.08783
		6.38659e-05	2.5248
		0.02468	4.67341
		0.0224	2.64488
		0.10272	4.69336
		0.02673	4.36962
		0.00512	1.8866
		0.01295	3.06179
		0.00482	1.87643
		0.02772	3.23018
		0.01605	2.89318
		0.01967	4.0434
		0.00463	0.14122
		0.01583	2.17285
		0.000965572	1.84712
		0.01719	3.56453
		0.01535	3.12134
		0.00965	3.05774
		0.03013	4.00939
		0.02697	3.59737
		0.01813	3.86314
		0.00816	2.36742
		0.000469443	2.88902
		0.01376	2.16521
		2.37307e-11	0.77074
		0.0106	2.80513
		0.00138	1.56131
		0.00311	2.214
		0.00442	1.87518
		0.01908	2.23687
		4.58957e-12	0.35105
		0.04154	4.41731
		0.00026032	0.22863
		0.01654	3.46657
		0.00412	1.72839
		0.01052	2.5173
		0.000511398	1.9856
		0.00706	2.67325
		0.02765	3.70816
		7.48747e-06	2.02191
		0.01774	3.32931
		1.58382e-07	0.09299
		0.000213964	0.43936
		0.00872	2.50105
		0.00616	2.07975
		3.09168e-09	1.88884
		0.00229	1.97419
		3.34553e-05	3.05435
		0.01079	2.57176
		0.00842	2.43389
		0.00992	2.25116
		0.01368	3.32959
		0.03922	5.33431
		0.01494	1.97371
		0.00843	2.46319
		0.02329	3.68563
		0.00194	1.19095
		0.01846	3.65613
		0.01239	2.96514
		0.01451	3.24235
		0.02912	4.46683
		0.01615	0.94117
		3.81804e-07	0.73243
		0.00756	2.33573
		0.01332	3.11942
		3.9782e-05	1.70139
		0.0049	1.85376
		6.14708e-12	0.38045
		0.0178	3.58696
		0.02161	3.95043
		0.02733	1.12788
		0.0135	2.98985
		0.01179	0.50994
		0.02796	1.49033
		0.02143	3.63466
		0.01194	2.92177
		0.000373271	1.42122
		0.01297	3.50355
		0.00901	2.51736
		0.00809	2.25741
		0.01861	3.68914
		0.03147	3.24642
		0.011	2.62276
		0.00672	2.35625
		0.00701	2.07566
		0.01325	3.11121
		0.01548	3.35086
		0.00647	3.49967
		0.01039	2.13949
		0.00365	1.15287
		0.01602	2.85546
		0.01472	1.16371
		0.00562	2.19094
		0.01685	3.38296
		2.00538e-05	2.38386
		0.02091	2.23421
		0.01813	0.97397
		0.00522	2.93507
		0.00805	2.38892
		0.02134	3.91708
		0.02556	3.23166
		0.00862	2.02327
		0.01574	3.21372
		0.01346	0.66727
		0.01935	2.84988
		0.15973	6.98223
		0.00635	2.54794
		0.01259	2.54632
		0.000383846	2.10586
		0.01518	3.35924
		0.00124	1.3767
		0.02423	3.42492
		0.000170709	2.90165
		0.01552	3.86973
		3.13464e-08	0.42478
		0.00999	2.53585
		0.01538	3.38723
		0.00988	2.78168
		0.00772	2.38261
		0.01455	3.223
		0.000147302	2.54028
		0.01501	3.34055
		0.07291	3.56483
		0.01233	3.62303
		0.01924	2.49385
		0.04711	5.83574
		0.01247	2.68951
		0.01409	2.75756
		0.0064	1.86692
		0.000694658	2.72938
		0.03227	1.63154
		0.00821	2.30421
		0.01743	1.67612
		0.04888	3.61988
		0.00369	2.63848
		0.06503	5.37247
		0.02999	2.84745
		0.01055	3.57565
		0.01619	3.41495
		0.01237	2.99032
		0.00753	2.63832
		0.01251	3.6772
		0.00197	0.99155
		0.01333	3.49272
		0.01115	1.66285
		0.03137	2.12544
		0.02751	2.99305
		0.01295	3.35
		7.92886e-06	1.50823
		0.0043	2.91836
		1.75153e-06	2.51641
		0.01456	2.46675
		0.00154	1.14113
		4.00186e-05	3.28176
		0.00445	1.77235
		0.00922	3.53376
		0.0376	5.28327
		0.00849	2.45069
		0.00672	1.63323
		0.04864	4.20571
		0.02312	2.33824
		0.01125	3.00631
		0.01633	3.35872
		0.01289	3.10555
		0.00514	1.8121
		0.01612	2.98986
		0.00321	3.37665
		0.01337	0.48086
		0.01116	2.74709
		0.01075	3.31546
		0.00355	2.79744
		0.01137	2.83907
		0.01982	3.51456
		0.00474	1.83187
		0.00571	2.02716
		0.0117	2.89448
		0.01996	2.68357
		0.0267	4.22404
		0.02252	1.59493
		0.00469	0.96577
		0.00642	2.85391
		0.10066	4.43609
		0.01252	3.32391
		0.01196	2.61259
		0.01364	3.22428
		0.03522	4.29155
		0.00245	0.72696
		0.00703	0.92789
		0.04089	4.29858
		0.07909	5.39386
		0.000684431	1.35667
		0.01872	4.06011
		0.01954	4.00179
		0.01073	2.79667
		0.00604	2.95013
		0.04731	3.77744
		0.0098	2.63172
		0.01244	2.90432
		0.01119	2.84206
		0.02284	4.78446
		0.00202	2.31852
		0.01674	3.91791
		0.03124	5.08076
		0.0452	4.74147
		0.0109	2.49366
		0.01021	1.41975
		0.00388	1.65932
		0.000726423	1.40307
		0.00142	1.96521
		0.01572	2.24082
		0.03146	3.79829
		0.00835	3.70804
		0.01365	3.04899
		0.023	1.5366
		0.01498	3.06994
		0.07069	3.98588
		0.01407	3.23234
		0.01253	2.92146
		0.12711	5.90012
		0.01216	2.98808
		0.02124	2.86745
		0.01847	3.35567
		0.0158	2.42365
		0.000533028	1.73581
		0.01691	3.31496
		0.01803	2.26233
		0.01248	2.90681
		0.04661	3.4877
		0.000105998	1.97347
		0.01036	1.5204
		0.01462	2.74824
		0.01775	3.04555
		0.00642	0.3515
		0.00863	2.70492
		0.00607	1.89328
		0.00813	2.22472
		0.02314	3.83458
		0.04537	5.07474
		0.00614	2.11369
		0.0018	1.11994
		0.01468	3.30126
		0.0012	2.29067
		0.00733	1.17105
		0.03092	1.54629
		0.01905	3.32092
		0.00377	1.91874
		0.01723	1.33464
		0.03328	3.23911
		0.02007	1.75841
		0.01196	3.03126
		0.01021	2.79172
		0.01185	2.90921
		0.02495	2.76369
		0.01254	2.26255
		0.01093	2.7489
		0.01373	3.16353
		0.01365	3.18355
		0.01019	2.35189
		0.02667	2.31321
		0.00753	1.56563
		0.01527	3.29567
		0.00956	2.84286
		2.88794e-05	2.21148
		0.00692	2.21565
		0.0012	0.97093
		0.000166628	3.43899
		0.02186	3.24933
		0.01147	3.86746
		3.438e-05	0.83517
		0.000156121	0.35563
		0.01134	2.85707
		0.04442	4.4596
		0.07723	5.13504
		0.00253	1.33508
		0.03455	5.34541
		0.03792	4.89531
		0.02593	3.177
		0.00043705	2.60276
		0.01821	3.32153
		0.03096	2.31998
		0.01446	3.72254
		0.04235	3.25671
		0.01523	2.74165
		0.00911	2.25242
		0.00605	3.56801
		0.04168	3.44874
		0.0211	3.16301
		0.00595	2.03581
		0.01588	3.34615
		0.00624	2.78068
		0.02663	3.28904
		5.6779e-05	2.07142
		0.000347153	1.55059
		0.0133	3.00983
		0.00187	1.34141
		0.02082	1.76098
		0.01197	3.36813
		0.01254	3.0214
		0.01915	3.0687
		0.01776	3.61853
		0.01275	2.98856
		0.01294	3.03109
		0.02241	4.02504
		0.02508	4.24784
		0.01075	2.82989
		0.0121	1.55724
		0.00456	1.81497
		0.0215	3.11384
		0.01529	3.34636
		0.01826	3.6175
		0.01106	2.48297
		0.01009	2.70777
		0.01317	2.89747
		0.04028	5.19983
		0.00125	2.48831
		4.83257e-12	2.13447
		0.02053	1.98295
		0.0095	2.10078
		0.03235	3.8147
		0.04358	3.03323
		0.00824	3.67954
		0.01465	1.34096
		0.01146	2.81524
		0.00763	1.45997
		0.01175	2.3803
		0.00548	1.98139
		0.025	0.86061
		0.000222672	0.48857
		0.01469	3.11959
		0.01475	3.26705
		0.02002	2.49506
		0.01397	3.16838
		0.00987	1.06112
		0.0115	2.88914
		0.03368	2.00337
		0.11089	5.85119
		0.0261	1.79741
		0.00522	2.30633
		0.00888	2.84807
		0.01363	3.01258
		0.052	5.04289
		0.03234	4.48602
		0.00453	1.90076
		0.02032	1.50424
		0.03051	4.10239
		0.02088	3.40215
		0.02135	0.90612
		0.000963473	3.01678
		0.01195	2.94517
		3.11702e-07	1.83579
		0.00357	1.67656
		0.00232	2.47445
		0.02448	3.67584
		0.0921	5.79003
		0.01715	2.86847
		0.01877	3.98176
		0.01194	3.04941
		0.03225	4.01169
		0.02202	2.81705
		0.021	2.86345
		2.45409e-13	1.68808
		0.02366	3.42942
		0.00126	1.98456
		0.01826	2.88635
		0.02043	3.85895
		0.01551	3.11442
		0.01301	3.06048
		0.01743	3.31657
		0.0084	3.40575
		0.05167	2.20651
		0.01464	2.67988
		0.02201	0.62665
		0.02392	1.91171
		0.01298	3.06358
		0.02051	2.31745
		0.00481	1.84512
		0.01016	3.87331
		0.00268	1.41001
		0.000162899	0.36594
		0.01	2.68981
		0.01599	3.01822
		0.00431	1.77431
		0.0168	3.53275
		0.00647	2.14145
		0.02371	2.62534
		0.0122	2.75346
		0.01217	2.52392
		0.00487	2.18064
		0.03741	5.38744
		0.01196	3.35328
		0.01143	2.7674
		0.00381	1.86806
		0.0241	3.41576
		0.09931	5.88909
		0.01387	3.61768
		0.0089	3.11408
		0.03677	4.02438
		0.02239	4.00907
		2.08056e-05	0.1827
		0.00841	2.50126
		0.00232	1.61292
		0.02303	1.07598
		0.01163	2.92034
		0.01638	3.44075
		0.01846	2.321
		0.01587	3.38995
		0.00801	2.35144
		0.00259	1.78129
		0.00901	2.55419
		0.02408	4.57593
		0.01186	3.48263
		0.0193	3.19697
		0.00789	2.93132
		0.00321	1.85661
		0.01894	0.36799
		0.01067	2.77859
		0.04429	3.99679
		0.03146	2.90965
		0.01622	3.41415
		0.00898	2.52445
		0.02085	3.91605
		0.00112	1.77519
		0.02875	2.42202
		0.00476	3.46623
		0.01477	3.49929
		0.03724	2.41502
		0.01327	3.08552
		0.02395	2.56232
		0.000763835	1.32672
		0.00933	3.05575
		0.04278	3.87709
		0.01327	3.85796
		0.0126	2.96346
		0.01104	2.46438
		1.17502e-06	2.15227
		0.0468	4.83281
		0.09964	5.47455
		0.03045	4.24649
		0.00596	1.21083
		0.01681	3.31068
		0.01067	1.79129
		0.0192	3.82089
		0.01389	2.4164
		0.00794	2.70043
		0.02176	3.99521
		0.01222	4.533
		6.51728e-06	0.36357
		0.02452	1.93205
		0.00276	2.88242
		0.01487	3.79534
		0.01943	3.74041
		0.01126	2.84537
		0.00873	2.81652
		0.01681	3.4939
		0.01183	2.93138
		0.01395	3.05669
		0.00632	2.11521
		0.0177	3.59873
		0.0247	2.9011
		0.02631	2.63094
		0.01	2.67177
		0.02641	2.66204
		0.01081	3.1877
		0.01782	3.58504
		0.01408	4.21534
		0.01143	2.94782
		0.0155	2.85829
		0.01824	3.93484
		0.00836	1.81871
		6.93769e-07	1.55016
		0.000637415	0.52865
		0.01675	3.38477
		0.00723	3.50146
		0.01971	2.49416
		0.04195	5.3163
		0.01896	2.82487
		0.01173	1.90812
		0.01566	3.61193
		0.0051	1.9431
		0.01233	3.48097
		0.01967	0.81746
		0.01145	2.83978
		0.01701	0.99854
		0.00153	2.71615
		0.0106	1.86902
		0.00238	2.38457
		0.01552	3.40359
		0.01228	2.40319
		0.01066	0.13472
		0.01774	3.03554
		0.0292	3.02474
		0.02636	2.28763
		0.02396	3.87006
		0.01065	0.84704
		0.01911	3.10849
		0.01628	3.96888
		0.0053	3.32784
		0.01407	3.25998
		0.01432	1.18521
		0.01354	3.29058
		0.01907	2.8582
		0.03742	5.26207
		0.01493	4.04911
		0.01828	3.0169
		0.04889	4.6607
		0.01264	2.98091
		0.005	2.91858
