# Supplementary material for: Cell crowding activates pro-invasive mechanotransduction pathway in high-grade DCIS via TRPV4 inhibition and cell volume reduction
Source: eLife. 2025 Apr 21;13:RP100490. doi: 10.7554/eLife.100490 (PMC12011371; doi:10.7554/eLife.100490)
Supplement: Figure 6—source data 11. [file elife-100490-fig6-data11.xlsx]

## Sheet: Sheet1
Numerical data for Figure 6P-Q - for correlating cell D vs % PM TRPV4 in various cells
	mean %PM TRPV4	D-ETCC6 (mean, SD, #)			D-ETCC10 (mean, SD, #)			D-AT1 (mean, SD, #)			D-DCIS.com (mean, SD, #)			D-CA1a (mean, SD, #)			D-231 (mean, SD, #)
etcc6ctrl	5.4	0.011	0.00543	65
etcc6gsk1	5.5	0.02	0.01	66
etcc6gsk2	8	0.02	0.02	24
etcc6peg	5.2	0.01	0.005	100
etcc10ctrl	5.6				0.011	0.012	317
etcc10gsk1	6				0.009	0.0044	71
etcc10gsk2	5.4				0.0159	0.016	1136
etcc10peg	8				0.01047	0.007235	73
at1ctrl	6.8							0.0114	0.008572	130
at1gsk1	6.2							0.01125	0.006348	160
at1gsk2	12							0.002611	0.003243	582
at1peg	8.9							0.014	0.01609	209
dcisctrl	13.6										0.0102	0.005121	100
dcisgsk1	12.4										0.002051	0.003015	100
dcisgsk2	54.6										0.01256	0.01007	100
dcispeg	71.4										0.01327	0.01072	100
ca1actrl	37.53													0.01276	0.01665	271
ca1agsk1	30													0.002422	0.002592	631
ca1agsk2	50													0.01465	0.01511	782
ca1apeg	79													0.009713	0.003727	182
231ctrl	5.4																0.01222	0.0155	57
231gsk1	5.3																0.0104	0.002554	6
231gsk2	6																0.009614	0.002738	21
231peg	6																0.01378	0.01761	442
