# Supplementary material for: Cell crowding activates pro-invasive mechanotransduction pathway in high-grade DCIS via TRPV4 inhibition and cell volume reduction
Source: eLife. 2025 Apr 21;13:RP100490. doi: 10.7554/eLife.100490 (PMC12011371; doi:10.7554/eLife.100490)
Supplement: Figure 6—source data 12. [file elife-100490-fig6-data12.xlsx]

## Sheet: Sheet1
Numerical data for Figure 6R-S - for correlating D-peg/D-ctrl or D-GSK2/D-GSK1 vs % PM TRPV4-peg/% PM TRPV4-ctrl in various cells
	% PM TRPV4	Dpeg74/Dctl	Dgsk2/Dctrl	Dgsk2/Dgsk1
ETCC06	0.962963	0.909091	0.64	1.06
ETCC010	1.42857	0.909091	0	0.625
MCF10AT1	1.30882	0.87	0.23	0.23
MDA-MB-231	1.11111	0.8	0.8	0.96
MCF10DCIS.com	5.25	1.30392	1.4	6
MCF10CA1a	2.73	1.16	1.15	8.82
